# Supplementary material
Source: publisher figshare collection journal article supplement (https://springernature.figshare.com/ndownloader/files/14640173)
Supplement: Supplementary file 1 [file 14640173]

jcf7180002375735_pilon	maker	exon	110188	110376	.	+	.	ID=DT18735-RB:exon:3504;Parent=DT18735-RB;
jcf7180002375735_pilon	maker	exon	111895	112653	.	+	.	ID=DT18735-RB:exon:3505;Parent=DT18735-RB;
jcf7180002375735_pilon	maker	exon	123055	123187	.	+	.	ID=DT18735-RB:exon:3506;Parent=DT18735-RB;
jcf7180002375735_pilon	maker	exon	123272	124785	.	+	.	ID=DT18735-RB:exon:3507;Parent=DT18735-RB;
jcf7180002375735_pilon	maker	exon	124868	125450	.	+	.	ID=DT18735-RB:exon:3508;Parent=DT18735-RB;
jcf7180002375735_pilon	maker	exon	125538	125723	.	+	.	ID=DT18735-RB:exon:3509;Parent=DT18735-RB;
jcf7180002375735_pilon	maker	exon	125808	125914	.	+	.	ID=DT18735-RB:exon:3510;Parent=DT18735-RB;
jcf7180002375735_pilon	maker	exon	126770	131660	.	+	.	ID=DT18735-RB:exon:3511;Parent=DT18735-RB;
jcf7180002375735_pilon	maker	exon	108618	108624	.	+	.	ID=DT18735-RA:exon:3512;Parent=DT18735-RA;
jcf7180002375735_pilon	maker	exon	108799	108871	.	+	.	ID=DT18735-RA:exon:3513;Parent=DT18735-RA;
jcf7180002375735_pilon	maker	exon	111895	111996	.	+	.	ID=DT18735-RA:exon:3514;Parent=DT18735-RA;
jcf7180002375735_pilon	maker	exon	112084	112186	.	+	.	ID=DT18735-RA:exon:3515;Parent=DT18735-RA;
jcf7180002375735_pilon	maker	exon	44613	44836	.	+	.	ID=DT18729-RB:exon:3516;Parent=DT18729-RB,DT18729-RA;
jcf7180002375735_pilon	maker	exon	48600	48819	.	+	.	ID=DT18729-RB:exon:3517;Parent=DT18729-RB;
jcf7180002375735_pilon	maker	exon	48896	49073	.	+	.	ID=DT18729-RB:exon:3518;Parent=DT18729-RB,DT18729-RA;
jcf7180002375735_pilon	maker	exon	49714	49822	.	+	.	ID=DT18729-RB:exon:3519;Parent=DT18729-RB,DT18729-RA;
jcf7180002375735_pilon	maker	exon	50753	50854	.	+	.	ID=DT18729-RB:exon:3520;Parent=DT18729-RB,DT18729-RA;
jcf7180002375735_pilon	maker	exon	50937	51029	.	+	.	ID=DT18729-RB:exon:3521;Parent=DT18729-RB,DT18729-RA;
jcf7180002375735_pilon	maker	exon	51110	51295	.	+	.	ID=DT18729-RB:exon:3522;Parent=DT18729-RB;
jcf7180002375735_pilon	maker	exon	52360	52449	.	+	.	ID=DT18729-RB:exon:3523;Parent=DT18729-RB,DT18729-RA;
jcf7180002375735_pilon	maker	exon	52541	52649	.	+	.	ID=DT18729-RB:exon:3524;Parent=DT18729-RB,DT18729-RA;
jcf7180002375735_pilon	maker	exon	52736	52891	.	+	.	ID=DT18729-RB:exon:3525;Parent=DT18729-RB,DT18729-RA;
jcf7180002375735_pilon	maker	exon	53681	54151	.	+	.	ID=DT18729-RB:exon:3526;Parent=DT18729-RB,DT18729-RA;
jcf7180002375735_pilon	maker	exon	48602	48819	.	+	.	ID=DT18729-RA:exon:3527;Parent=DT18729-RA;
jcf7180002375735_pilon	maker	exon	51128	51295	.	+	.	ID=DT18729-RA:exon:3528;Parent=DT18729-RA;
jcf7180002375735_pilon	maker	exon	201730	201888	.	+	.	ID=DT18740-RA:exon:3529;Parent=DT18740-RA;
jcf7180002375735_pilon	maker	exon	202284	202391	.	+	.	ID=DT18740-RA:exon:3530;Parent=DT18740-RA;
jcf7180002375735_pilon	maker	exon	205671	205797	.	+	.	ID=DT18740-RA:exon:3531;Parent=DT18740-RA;
jcf7180002375735_pilon	maker	exon	207332	207493	.	+	.	ID=DT18740-RA:exon:3532;Parent=DT18740-RA;
jcf7180002375735_pilon	maker	exon	209376	209570	.	+	.	ID=DT18740-RA:exon:3533;Parent=DT18740-RA;
jcf7180002375735_pilon	maker	exon	219275	219387	.	+	.	ID=DT18740-RA:exon:3534;Parent=DT18740-RA;
jcf7180002375735_pilon	maker	exon	222617	222695	.	+	.	ID=DT18740-RA:exon:3535;Parent=DT18740-RA;
jcf7180002375735_pilon	maker	exon	222770	223129	.	+	.	ID=DT18740-RA:exon:3536;Parent=DT18740-RA;
jcf7180002375735_pilon	maker	exon	145938	145958	.	+	.	ID=DT18737-RF:exon:3537;Parent=DT18737-RF;
jcf7180002375735_pilon	maker	exon	146086	146205	.	+	.	ID=DT18737-RF:exon:3538;Parent=DT18737-RF;
jcf7180002375735_pilon	maker	exon	150303	150340	.	+	.	ID=DT18737-RF:exon:3539;Parent=DT18737-RF,DT18737-RC,DT18737-RD,DT18737-RE,DT18737-RB,DT18737-RA;
jcf7180002375735_pilon	maker	exon	150462	150555	.	+	.	ID=DT18737-RF:exon:3540;Parent=DT18737-RF,DT18737-RC,DT18737-RD,DT18737-RE,DT18737-RB,DT18737-RA;
jcf7180002375735_pilon	maker	exon	150666	150823	.	+	.	ID=DT18737-RF:exon:3541;Parent=DT18737-RF,DT18737-RC,DT18737-RD,DT18737-RE,DT18737-RB,DT18737-RA;
jcf7180002375735_pilon	maker	exon	152969	153143	.	+	.	ID=DT18737-RF:exon:3542;Parent=DT18737-RF,DT18737-RC,DT18737-RD,DT18737-RE,DT18737-RB,DT18737-RA;
jcf7180002375735_pilon	maker	exon	153274	153450	.	+	.	ID=DT18737-RF:exon:3543;Parent=DT18737-RF,DT18737-RC,DT18737-RD,DT18737-RE,DT18737-RB,DT18737-RA;
jcf7180002375735_pilon	maker	exon	153557	153699	.	+	.	ID=DT18737-RF:exon:3544;Parent=DT18737-RF,DT18737-RC,DT18737-RD;
jcf7180002375735_pilon	maker	exon	153775	153920	.	+	.	ID=DT18737-RF:exon:3545;Parent=DT18737-RF,DT18737-RC,DT18737-RD;
jcf7180002375735_pilon	maker	exon	153991	154141	.	+	.	ID=DT18737-RF:exon:3546;Parent=DT18737-RF,DT18737-RC,DT18737-RD,DT18737-RE,DT18737-RB,DT18737-RA;
jcf7180002375735_pilon	maker	exon	156210	156351	.	+	.	ID=DT18737-RF:exon:3547;Parent=DT18737-RF,DT18737-RC,DT18737-RD,DT18737-RE,DT18737-RB,DT18737-RA;
jcf7180002375735_pilon	maker	exon	158238	158242	.	+	.	ID=DT18737-RF:exon:3548;Parent=DT18737-RF,DT18737-RC,DT18737-RD,DT18737-RE,DT18737-RB,DT18737-RA;
jcf7180002375735_pilon	maker	exon	158353	158512	.	+	.	ID=DT18737-RF:exon:3549;Parent=DT18737-RF,DT18737-RC,DT18737-RD,DT18737-RE,DT18737-RB,DT18737-RA;
jcf7180002375735_pilon	maker	exon	159583	159752	.	+	.	ID=DT18737-RF:exon:3550;Parent=DT18737-RF,DT18737-RC,DT18737-RD,DT18737-RE,DT18737-RB,DT18737-RA;
jcf7180002375735_pilon	maker	exon	162094	162268	.	+	.	ID=DT18737-RF:exon:3551;Parent=DT18737-RF,DT18737-RC,DT18737-RD,DT18737-RE,DT18737-RB,DT18737-RA;
jcf7180002375735_pilon	maker	exon	162335	162628	.	+	.	ID=DT18737-RF:exon:3552;Parent=DT18737-RF,DT18737-RC,DT18737-RD,DT18737-RE,DT18737-RB,DT18737-RA;
jcf7180002375735_pilon	maker	exon	162725	162905	.	+	.	ID=DT18737-RF:exon:3553;Parent=DT18737-RF,DT18737-RC,DT18737-RE;
jcf7180002375735_pilon	maker	exon	162984	163102	.	+	.	ID=DT18737-RF:exon:3554;Parent=DT18737-RF,DT18737-RC,DT18737-RE;
jcf7180002375735_pilon	maker	exon	163216	163346	.	+	.	ID=DT18737-RF:exon:3555;Parent=DT18737-RF,DT18737-RC,DT18737-RD,DT18737-RE,DT18737-RB,DT18737-RA;
jcf7180002375735_pilon	maker	exon	165902	166019	.	+	.	ID=DT18737-RF:exon:3556;Parent=DT18737-RF,DT18737-RC,DT18737-RD,DT18737-RE,DT18737-RB,DT18737-RA;
jcf7180002375735_pilon	maker	exon	166177	166269	.	+	.	ID=DT18737-RF:exon:3557;Parent=DT18737-RF,DT18737-RC,DT18737-RD,DT18737-RE,DT18737-RB,DT18737-RA;
jcf7180002375735_pilon	maker	exon	167474	167602	.	+	.	ID=DT18737-RF:exon:3558;Parent=DT18737-RF,DT18737-RC,DT18737-RD,DT18737-RE,DT18737-RB,DT18737-RA;
jcf7180002375735_pilon	maker	exon	167814	167838	.	+	.	ID=DT18737-RF:exon:3559;Parent=DT18737-RF,DT18737-RC,DT18737-RD,DT18737-RE,DT18737-RB,DT18737-RA;
jcf7180002375735_pilon	maker	exon	168925	169103	.	+	.	ID=DT18737-RF:exon:3560;Parent=DT18737-RF,DT18737-RC,DT18737-RD,DT18737-RE,DT18737-RB,DT18737-RA;
jcf7180002375735_pilon	maker	exon	170315	170397	.	+	.	ID=DT18737-RF:exon:3561;Parent=DT18737-RF,DT18737-RC,DT18737-RD,DT18737-RE,DT18737-RB,DT18737-RA;
jcf7180002375735_pilon	maker	exon	172131	172420	.	+	.	ID=DT18737-RF:exon:3562;Parent=DT18737-RF,DT18737-RC,DT18737-RD,DT18737-RE,DT18737-RB,DT18737-RA;
jcf7180002375735_pilon	maker	exon	173710	175148	.	+	.	ID=DT18737-RF:exon:3563;Parent=DT18737-RF,DT18737-RC,DT18737-RD,DT18737-RE,DT18737-RB;
jcf7180002375735_pilon	maker	exon	176355	176823	.	+	.	ID=DT18737-RF:exon:3564;Parent=DT18737-RF,DT18737-RC,DT18737-RD,DT18737-RE,DT18737-RB;
jcf7180002375735_pilon	maker	exon	145801	146205	.	+	.	ID=DT18737-RC:exon:3565;Parent=DT18737-RC,DT18737-RD,DT18737-RE,DT18737-RB,DT18737-RA;
jcf7180002375735_pilon	maker	exon	162725	163102	.	+	.	ID=DT18737-RD:exon:3566;Parent=DT18737-RD,DT18737-RB,DT18737-RA;
jcf7180002375735_pilon	maker	exon	153557	153920	.	+	.	ID=DT18737-RE:exon:3567;Parent=DT18737-RE,DT18737-RB,DT18737-RA;
jcf7180002375735_pilon	maker	exon	173710	175272	.	+	.	ID=DT18737-RA:exon:3568;Parent=DT18737-RA;
jcf7180002375735_pilon	maker	exon	32589	32808	.	+	.	ID=DT18728-RA:exon:3569;Parent=DT18728-RA;
jcf7180002375735_pilon	maker	exon	32938	33102	.	+	.	ID=DT18728-RA:exon:3570;Parent=DT18728-RA;
jcf7180002375735_pilon	maker	exon	36759	37567	.	+	.	ID=DT18728-RA:exon:3571;Parent=DT18728-RA;
jcf7180002375735_pilon	maker	exon	79645	80070	.	+	.	ID=DT18732-RA:exon:3572;Parent=DT18732-RA;
jcf7180002375735_pilon	maker	exon	80483	80492	.	+	.	ID=DT18732-RA:exon:3573;Parent=DT18732-RA;
jcf7180002375735_pilon	maker	exon	81910	82014	.	+	.	ID=DT18732-RA:exon:3574;Parent=DT18732-RA;
jcf7180002375735_pilon	maker	exon	82095	82232	.	+	.	ID=DT18732-RA:exon:3575;Parent=DT18732-RA;
jcf7180002375735_pilon	maker	exon	82317	82478	.	+	.	ID=DT18732-RA:exon:3576;Parent=DT18732-RA;
jcf7180002375735_pilon	maker	exon	83552	83660	.	+	.	ID=DT18732-RA:exon:3577;Parent=DT18732-RA;
jcf7180002375735_pilon	maker	exon	83726	83853	.	+	.	ID=DT18732-RA:exon:3578;Parent=DT18732-RA;
jcf7180002375735_pilon	maker	exon	83933	84094	.	+	.	ID=DT18732-RA:exon:3579;Parent=DT18732-RA;
jcf7180002375735_pilon	maker	exon	225795	226470	.	+	.	ID=DT18741-RA:exon:3580;Parent=DT18741-RA;
jcf7180002375735_pilon	maker	exon	234142	235438	.	+	.	ID=DT18741-RA:exon:3581;Parent=DT18741-RA;
jcf7180002375735_pilon	maker	exon	132959	133074	.	+	.	ID=DT18736-RA:exon:3582;Parent=DT18736-RA;
jcf7180002375735_pilon	maker	exon	133236	133359	.	+	.	ID=DT18736-RA:exon:3583;Parent=DT18736-RA;
jcf7180002375735_pilon	maker	exon	135219	135324	.	+	.	ID=DT18736-RA:exon:3584;Parent=DT18736-RA;
jcf7180002375735_pilon	maker	exon	135420	135561	.	+	.	ID=DT18736-RA:exon:3585;Parent=DT18736-RA;
jcf7180002375735_pilon	maker	exon	136957	137095	.	+	.	ID=DT18736-RA:exon:3586;Parent=DT18736-RA;
jcf7180002375735_pilon	maker	exon	138753	138869	.	+	.	ID=DT18736-RA:exon:3587;Parent=DT18736-RA;
jcf7180002375735_pilon	maker	exon	139928	140152	.	+	.	ID=DT18736-RA:exon:3588;Parent=DT18736-RA;
jcf7180002375735_pilon	maker	exon	236213	236217	.	+	.	ID=DT18742-RA:exon:3589;Parent=DT18742-RA;
jcf7180002375735_pilon	maker	exon	245193	245229	.	+	.	ID=DT18742-RA:exon:3590;Parent=DT18742-RA;
jcf7180002375735_pilon	maker	exon	250611	250723	.	+	.	ID=DT18742-RA:exon:3591;Parent=DT18742-RA;
jcf7180002375735_pilon	maker	exon	257586	257697	.	+	.	ID=DT18742-RA:exon:3592;Parent=DT18742-RA;
jcf7180002375735_pilon	maker	exon	257886	257980	.	+	.	ID=DT18742-RA:exon:3593;Parent=DT18742-RA;
jcf7180002375735_pilon	maker	exon	263420	263541	.	+	.	ID=DT18742-RA:exon:3594;Parent=DT18742-RA,DT18742-RC;
jcf7180002375735_pilon	maker	exon	270088	270557	.	+	.	ID=DT18742-RA:exon:3595;Parent=DT18742-RA,DT18742-RC;
jcf7180002375735_pilon	maker	exon	248460	248463	.	+	.	ID=DT18742-RB:exon:3596;Parent=DT18742-RB;
jcf7180002375735_pilon	maker	exon	249962	250047	.	+	.	ID=DT18742-RB:exon:3597;Parent=DT18742-RB;
jcf7180002375735_pilon	maker	exon	250611	250727	.	+	.	ID=DT18742-RB:exon:3598;Parent=DT18742-RB;
jcf7180002375735_pilon	maker	exon	263358	263365	.	+	.	ID=DT18742-RC:exon:3599;Parent=DT18742-RC;
jcf7180002375735_pilon	maker	exon	95886	96009	.	-	.	ID=DT18733-RA:exon:3604;Parent=DT18733-RA;
jcf7180002375735_pilon	maker	exon	94855	95601	.	-	.	ID=DT18733-RB:exon:3603;Parent=DT18733-RB,DT18733-RA;
jcf7180002375735_pilon	maker	exon	95680	95802	.	-	.	ID=DT18733-RB:exon:3602;Parent=DT18733-RB,DT18733-RA;
jcf7180002375735_pilon	maker	exon	95886	95995	.	-	.	ID=DT18733-RB:exon:3601;Parent=DT18733-RB;
jcf7180002375735_pilon	maker	exon	99130	99305	.	-	.	ID=DT18733-RB:exon:3600;Parent=DT18733-RB;
jcf7180002375735_pilon	maker	exon	172943	175164	.	-	.	ID=DT18738-RB:exon:3614;Parent=DT18738-RB;
jcf7180002375735_pilon	maker	exon	176374	176823	.	-	.	ID=DT18738-RB:exon:3613;Parent=DT18738-RB;
jcf7180002375735_pilon	maker	exon	173943	173951	.	-	.	ID=DT18738-RA:exon:3612;Parent=DT18738-RA;
jcf7180002375735_pilon	maker	exon	172209	172374	.	-	.	ID=DT18738-RA:exon:3611;Parent=DT18738-RA;
jcf7180002375735_pilon	maker	exon	167665	167808	.	-	.	ID=DT18738-RA:exon:3610;Parent=DT18738-RA;
jcf7180002375735_pilon	maker	exon	162746	163116	.	-	.	ID=DT18738-RA:exon:3609;Parent=DT18738-RA;
jcf7180002375735_pilon	maker	exon	162101	162286	.	-	.	ID=DT18738-RA:exon:3608;Parent=DT18738-RA;
jcf7180002375735_pilon	maker	exon	159673	159770	.	-	.	ID=DT18738-RA:exon:3607;Parent=DT18738-RA;
jcf7180002375735_pilon	maker	exon	156223	156319	.	-	.	ID=DT18738-RA:exon:3606;Parent=DT18738-RA;
jcf7180002375735_pilon	maker	exon	153337	153471	.	-	.	ID=DT18738-RA:exon:3605;Parent=DT18738-RA;
jcf7180002375735_pilon	maker	exon	290980	291178	.	-	.	ID=DT18744-RC:exon:3629;Parent=DT18744-RC;
jcf7180002375735_pilon	maker	exon	281653	282528	.	-	.	ID=DT18744-RA:exon:3628;Parent=DT18744-RA;
jcf7180002375735_pilon	maker	exon	281653	281838	.	-	.	ID=DT18744-RB:exon:3627;Parent=DT18744-RB,DT18744-RC;
jcf7180002375735_pilon	maker	exon	281882	282528	.	-	.	ID=DT18744-RB:exon:3626;Parent=DT18744-RB,DT18744-RC;
jcf7180002375735_pilon	maker	exon	285041	285124	.	-	.	ID=DT18744-RB:exon:3625;Parent=DT18744-RB,DT18744-RA,DT18744-RC;
jcf7180002375735_pilon	maker	exon	285195	285319	.	-	.	ID=DT18744-RB:exon:3624;Parent=DT18744-RB,DT18744-RA,DT18744-RC;
jcf7180002375735_pilon	maker	exon	285396	285553	.	-	.	ID=DT18744-RB:exon:3623;Parent=DT18744-RB,DT18744-RA,DT18744-RC;
jcf7180002375735_pilon	maker	exon	285634	285788	.	-	.	ID=DT18744-RB:exon:3622;Parent=DT18744-RB,DT18744-RA,DT18744-RC;
jcf7180002375735_pilon	maker	exon	288607	288747	.	-	.	ID=DT18744-RB:exon:3621;Parent=DT18744-RB,DT18744-RA,DT18744-RC;
jcf7180002375735_pilon	maker	exon	290053	290141	.	-	.	ID=DT18744-RB:exon:3620;Parent=DT18744-RB,DT18744-RA,DT18744-RC;
jcf7180002375735_pilon	maker	exon	290234	290356	.	-	.	ID=DT18744-RB:exon:3619;Parent=DT18744-RB,DT18744-RA,DT18744-RC;
jcf7180002375735_pilon	maker	exon	290980	291447	.	-	.	ID=DT18744-RB:exon:3618;Parent=DT18744-RB,DT18744-RA;
jcf7180002375735_pilon	maker	exon	291528	291597	.	-	.	ID=DT18744-RB:exon:3617;Parent=DT18744-RB,DT18744-RA;
jcf7180002375735_pilon	maker	exon	292224	293237	.	-	.	ID=DT18744-RB:exon:3616;Parent=DT18744-RB,DT18744-RA,DT18744-RC;
jcf7180002375735_pilon	maker	exon	293311	293507	.	-	.	ID=DT18744-RB:exon:3615;Parent=DT18744-RB,DT18744-RA,DT18744-RC;
jcf7180002375735_pilon	maker	exon	57259	57291	.	-	.	ID=DT18730-RA:exon:3635;Parent=DT18730-RA;
jcf7180002375735_pilon	maker	exon	58267	60372	.	-	.	ID=DT18730-RC:exon:3634;Parent=DT18730-RC;
jcf7180002375735_pilon	maker	exon	56768	57174	.	-	.	ID=DT18730-RB:exon:3633;Parent=DT18730-RB,DT18730-RA;
jcf7180002375735_pilon	maker	exon	59813	60372	.	-	.	ID=DT18730-RB:exon:3632;Parent=DT18730-RB;
jcf7180002375735_pilon	maker	exon	60448	60472	.	-	.	ID=DT18730-RB:exon:3631;Parent=DT18730-RB,DT18730-RC;
jcf7180002375735_pilon	maker	exon	63234	64205	.	-	.	ID=DT18730-RB:exon:3630;Parent=DT18730-RB,DT18730-RC;
jcf7180002375735_pilon	maker	exon	68483	69109	.	-	.	ID=DT18731-RA:exon:3639;Parent=DT18731-RA;
jcf7180002375735_pilon	maker	exon	71988	72099	.	-	.	ID=DT18731-RA:exon:3638;Parent=DT18731-RA;
jcf7180002375735_pilon	maker	exon	75029	75170	.	-	.	ID=DT18731-RA:exon:3637;Parent=DT18731-RA;
jcf7180002375735_pilon	maker	exon	75367	75649	.	-	.	ID=DT18731-RA:exon:3636;Parent=DT18731-RA;
jcf7180002375735_pilon	maker	exon	248981	250760	.	-	.	ID=DT18743-RA:exon:3661;Parent=DT18743-RA;
jcf7180002375735_pilon	maker	exon	254478	254583	.	-	.	ID=DT18743-RA:exon:3660;Parent=DT18743-RA;
jcf7180002375735_pilon	maker	exon	255403	255645	.	-	.	ID=DT18743-RA:exon:3659;Parent=DT18743-RA;
jcf7180002375735_pilon	maker	exon	256797	256902	.	-	.	ID=DT18743-RA:exon:3658;Parent=DT18743-RA;
jcf7180002375735_pilon	maker	exon	257120	257262	.	-	.	ID=DT18743-RA:exon:3657;Parent=DT18743-RA;
jcf7180002375735_pilon	maker	exon	257498	257677	.	-	.	ID=DT18743-RA:exon:3656;Parent=DT18743-RA;
jcf7180002375735_pilon	maker	exon	257802	257951	.	-	.	ID=DT18743-RA:exon:3655;Parent=DT18743-RA;
jcf7180002375735_pilon	maker	exon	258080	258164	.	-	.	ID=DT18743-RA:exon:3654;Parent=DT18743-RA;
jcf7180002375735_pilon	maker	exon	260368	260438	.	-	.	ID=DT18743-RA:exon:3653;Parent=DT18743-RA;
jcf7180002375735_pilon	maker	exon	260523	260652	.	-	.	ID=DT18743-RA:exon:3652;Parent=DT18743-RA;
jcf7180002375735_pilon	maker	exon	260741	260772	.	-	.	ID=DT18743-RA:exon:3651;Parent=DT18743-RA;
jcf7180002375735_pilon	maker	exon	260841	261006	.	-	.	ID=DT18743-RA:exon:3650;Parent=DT18743-RA;
jcf7180002375735_pilon	maker	exon	263466	263638	.	-	.	ID=DT18743-RA:exon:3649;Parent=DT18743-RA;
jcf7180002375735_pilon	maker	exon	263810	263960	.	-	.	ID=DT18743-RA:exon:3648;Parent=DT18743-RA;
jcf7180002375735_pilon	maker	exon	266671	266790	.	-	.	ID=DT18743-RA:exon:3647;Parent=DT18743-RA;
jcf7180002375735_pilon	maker	exon	266903	267018	.	-	.	ID=DT18743-RA:exon:3646;Parent=DT18743-RA;
jcf7180002375735_pilon	maker	exon	267098	267281	.	-	.	ID=DT18743-RA:exon:3645;Parent=DT18743-RA;
jcf7180002375735_pilon	maker	exon	267464	267676	.	-	.	ID=DT18743-RA:exon:3644;Parent=DT18743-RA;
jcf7180002375735_pilon	maker	exon	270015	270180	.	-	.	ID=DT18743-RA:exon:3643;Parent=DT18743-RA;
jcf7180002375735_pilon	maker	exon	270285	270570	.	-	.	ID=DT18743-RA:exon:3642;Parent=DT18743-RA;
jcf7180002375735_pilon	maker	exon	273586	274429	.	-	.	ID=DT18743-RA:exon:3641;Parent=DT18743-RA;
jcf7180002375735_pilon	maker	exon	274684	274831	.	-	.	ID=DT18743-RA:exon:3640;Parent=DT18743-RA;
jcf7180002375735_pilon	maker	exon	100808	101039	.	-	.	ID=DT18734-RB:exon:3670;Parent=DT18734-RB;
jcf7180002375735_pilon	maker	exon	99998	100829	.	-	.	ID=DT18734-RA:exon:3669;Parent=DT18734-RA;
jcf7180002375735_pilon	maker	exon	100915	101039	.	-	.	ID=DT18734-RA:exon:3668;Parent=DT18734-RA;
jcf7180002375735_pilon	maker	exon	101140	101221	.	-	.	ID=DT18734-RA:exon:3667;Parent=DT18734-RA,DT18734-RB;
jcf7180002375735_pilon	maker	exon	101304	101482	.	-	.	ID=DT18734-RA:exon:3666;Parent=DT18734-RA,DT18734-RB;
jcf7180002375735_pilon	maker	exon	103207	103324	.	-	.	ID=DT18734-RA:exon:3665;Parent=DT18734-RA,DT18734-RB;
jcf7180002375735_pilon	maker	exon	103405	103548	.	-	.	ID=DT18734-RA:exon:3664;Parent=DT18734-RA,DT18734-RB;
jcf7180002375735_pilon	maker	exon	103614	103673	.	-	.	ID=DT18734-RA:exon:3663;Parent=DT18734-RA,DT18734-RB;
jcf7180002375735_pilon	maker	exon	103932	103983	.	-	.	ID=DT18734-RA:exon:3662;Parent=DT18734-RA,DT18734-RB;
jcf7180002375735_pilon	maker	exon	177437	177722	.	-	.	ID=DT18739-RB:exon:3696;Parent=DT18739-RB,DT18739-RA;
jcf7180002375735_pilon	maker	exon	177796	177909	.	-	.	ID=DT18739-RB:exon:3695;Parent=DT18739-RB,DT18739-RA;
jcf7180002375735_pilon	maker	exon	179896	179943	.	-	.	ID=DT18739-RB:exon:3694;Parent=DT18739-RB,DT18739-RA;
jcf7180002375735_pilon	maker	exon	180570	180614	.	-	.	ID=DT18739-RB:exon:3693;Parent=DT18739-RB,DT18739-RA;
jcf7180002375735_pilon	maker	exon	183907	183967	.	-	.	ID=DT18739-RB:exon:3692;Parent=DT18739-RB,DT18739-RA;
jcf7180002375735_pilon	maker	exon	184991	185097	.	-	.	ID=DT18739-RB:exon:3691;Parent=DT18739-RB,DT18739-RA;
jcf7180002375735_pilon	maker	exon	185173	185238	.	-	.	ID=DT18739-RB:exon:3690;Parent=DT18739-RB,DT18739-RA;
jcf7180002375735_pilon	maker	exon	185319	185371	.	-	.	ID=DT18739-RB:exon:3689;Parent=DT18739-RB,DT18739-RA;
jcf7180002375735_pilon	maker	exon	185451	185566	.	-	.	ID=DT18739-RB:exon:3688;Parent=DT18739-RB,DT18739-RA;
jcf7180002375735_pilon	maker	exon	186825	186984	.	-	.	ID=DT18739-RB:exon:3687;Parent=DT18739-RB,DT18739-RA;
jcf7180002375735_pilon	maker	exon	188497	188605	.	-	.	ID=DT18739-RB:exon:3686;Parent=DT18739-RB,DT18739-RA;
jcf7180002375735_pilon	maker	exon	188680	188866	.	-	.	ID=DT18739-RB:exon:3685;Parent=DT18739-RB,DT18739-RA;
jcf7180002375735_pilon	maker	exon	188945	189031	.	-	.	ID=DT18739-RB:exon:3684;Parent=DT18739-RB,DT18739-RA;
jcf7180002375735_pilon	maker	exon	189334	189433	.	-	.	ID=DT18739-RB:exon:3683;Parent=DT18739-RB,DT18739-RA;
jcf7180002375735_pilon	maker	exon	190632	190759	.	-	.	ID=DT18739-RB:exon:3682;Parent=DT18739-RB,DT18739-RA;
jcf7180002375735_pilon	maker	exon	192095	192326	.	-	.	ID=DT18739-RB:exon:3681;Parent=DT18739-RB,DT18739-RA;
jcf7180002375735_pilon	maker	exon	194585	194699	.	-	.	ID=DT18739-RB:exon:3680;Parent=DT18739-RB,DT18739-RA;
jcf7180002375735_pilon	maker	exon	195120	195228	.	-	.	ID=DT18739-RB:exon:3679;Parent=DT18739-RB,DT18739-RA;
jcf7180002375735_pilon	maker	exon	195293	195383	.	-	.	ID=DT18739-RB:exon:3678;Parent=DT18739-RB,DT18739-RA;
jcf7180002375735_pilon	maker	exon	195465	195534	.	-	.	ID=DT18739-RB:exon:3677;Parent=DT18739-RB,DT18739-RA;
jcf7180002375735_pilon	maker	exon	197686	197749	.	-	.	ID=DT18739-RB:exon:3676;Parent=DT18739-RB,DT18739-RA;
jcf7180002375735_pilon	maker	exon	197836	197889	.	-	.	ID=DT18739-RB:exon:3675;Parent=DT18739-RB,DT18739-RA;
jcf7180002375735_pilon	maker	exon	198104	198163	.	-	.	ID=DT18739-RB:exon:3674;Parent=DT18739-RB;
jcf7180002375735_pilon	maker	exon	199698	199760	.	-	.	ID=DT18739-RB:exon:3673;Parent=DT18739-RB,DT18739-RA;
jcf7180002375735_pilon	maker	exon	199843	199929	.	-	.	ID=DT18739-RB:exon:3672;Parent=DT18739-RB,DT18739-RA;
jcf7180002375735_pilon	maker	exon	201415	201739	.	-	.	ID=DT18739-RB:exon:3671;Parent=DT18739-RB,DT18739-RA;
jcf7180002374548_pilon	maker	exon	91	162	.	+	.	ID=DT34652-RA:exon:540;Parent=DT34652-RA;
jcf7180002374548_pilon	maker	exon	267	338	.	+	.	ID=DT34653-RA:exon:541;Parent=DT34653-RA;
jcf7180002374548_pilon	maker	exon	562	633	.	+	.	ID=DT34654-RA:exon:542;Parent=DT34654-RA;
jcf7180002374548_pilon	maker	exon	866	937	.	+	.	ID=DT34655-RA:exon:543;Parent=DT34655-RA;
jcf7180002374548_pilon	maker	exon	1042	1113	.	+	.	ID=DT34656-RA:exon:544;Parent=DT34656-RA;
jcf7180002374548_pilon	maker	exon	1295	1366	.	+	.	ID=DT34657-RA:exon:545;Parent=DT34657-RA;
jcf7180002374548_pilon	maker	exon	1597	1668	.	+	.	ID=DT34658-RA:exon:546;Parent=DT34658-RA;
jcf7180002374548_pilon	maker	exon	3043	3114	.	+	.	ID=DT34659-RA:exon:547;Parent=DT34659-RA;
jcf7180002374548_pilon	maker	exon	3860	3931	.	+	.	ID=DT34660-RA:exon:548;Parent=DT34660-RA;
jcf7180002374548_pilon	maker	exon	4477	4548	.	+	.	ID=DT34661-RA:exon:549;Parent=DT34661-RA;
jcf7180002374548_pilon	maker	exon	5263	5334	.	+	.	ID=DT34662-RA:exon:550;Parent=DT34662-RA;
jcf7180002374548_pilon	maker	exon	5430	5501	.	+	.	ID=DT34663-RA:exon:551;Parent=DT34663-RA;
jcf7180002374548_pilon	maker	exon	5771	5842	.	+	.	ID=DT34664-RA:exon:552;Parent=DT34664-RA;
jcf7180002374548_pilon	maker	exon	5938	6009	.	+	.	ID=DT34665-RA:exon:553;Parent=DT34665-RA;
jcf7180002375876_pilon	maker	exon	1394	2140	.	+	.	ID=DT05675-RA:exon:2794;Parent=DT05675-RA;
jcf7180002375876_pilon	maker	exon	189188	189404	.	+	.	ID=DT05680-RA:exon:2795;Parent=DT05680-RA;
jcf7180002375876_pilon	maker	exon	190987	192836	.	+	.	ID=DT05680-RA:exon:2796;Parent=DT05680-RA;
jcf7180002375876_pilon	maker	exon	192962	193384	.	+	.	ID=DT05680-RA:exon:2797;Parent=DT05680-RA;
jcf7180002375876_pilon	maker	exon	193460	193546	.	+	.	ID=DT05680-RA:exon:2798;Parent=DT05680-RA;
jcf7180002375876_pilon	maker	exon	197033	197116	.	+	.	ID=DT05680-RA:exon:2799;Parent=DT05680-RA;
jcf7180002375876_pilon	maker	exon	197197	197280	.	+	.	ID=DT05680-RA:exon:2800;Parent=DT05680-RA;
jcf7180002375876_pilon	maker	exon	197371	197454	.	+	.	ID=DT05680-RA:exon:2801;Parent=DT05680-RA;
jcf7180002375876_pilon	maker	exon	197526	199333	.	+	.	ID=DT05680-RA:exon:2802;Parent=DT05680-RA;
jcf7180002375876_pilon	maker	exon	157541	157805	.	+	.	ID=DT05679-RA:exon:2803;Parent=DT05679-RA,DT05679-RB;
jcf7180002375876_pilon	maker	exon	160009	160212	.	+	.	ID=DT05679-RA:exon:2804;Parent=DT05679-RA;
jcf7180002375876_pilon	maker	exon	160282	160397	.	+	.	ID=DT05679-RA:exon:2805;Parent=DT05679-RA,DT05679-RB,DT05679-RC;
jcf7180002375876_pilon	maker	exon	164167	164365	.	+	.	ID=DT05679-RA:exon:2806;Parent=DT05679-RA,DT05679-RB,DT05679-RC;
jcf7180002375876_pilon	maker	exon	164665	164745	.	+	.	ID=DT05679-RA:exon:2807;Parent=DT05679-RA,DT05679-RB,DT05679-RC;
jcf7180002375876_pilon	maker	exon	166312	166491	.	+	.	ID=DT05679-RA:exon:2808;Parent=DT05679-RA,DT05679-RB,DT05679-RC;
jcf7180002375876_pilon	maker	exon	168494	168592	.	+	.	ID=DT05679-RA:exon:2809;Parent=DT05679-RA,DT05679-RB,DT05679-RC;
jcf7180002375876_pilon	maker	exon	168728	168841	.	+	.	ID=DT05679-RA:exon:2810;Parent=DT05679-RA,DT05679-RB,DT05679-RC;
jcf7180002375876_pilon	maker	exon	168951	169022	.	+	.	ID=DT05679-RA:exon:2811;Parent=DT05679-RA,DT05679-RB,DT05679-RC;
jcf7180002375876_pilon	maker	exon	170432	170551	.	+	.	ID=DT05679-RA:exon:2812;Parent=DT05679-RA,DT05679-RB,DT05679-RC;
jcf7180002375876_pilon	maker	exon	170755	170834	.	+	.	ID=DT05679-RA:exon:2813;Parent=DT05679-RA,DT05679-RB,DT05679-RC;
jcf7180002375876_pilon	maker	exon	172487	172592	.	+	.	ID=DT05679-RA:exon:2814;Parent=DT05679-RA,DT05679-RB,DT05679-RC;
jcf7180002375876_pilon	maker	exon	172894	173003	.	+	.	ID=DT05679-RA:exon:2815;Parent=DT05679-RA,DT05679-RB,DT05679-RC;
jcf7180002375876_pilon	maker	exon	173781	173875	.	+	.	ID=DT05679-RA:exon:2816;Parent=DT05679-RA,DT05679-RB,DT05679-RC;
jcf7180002375876_pilon	maker	exon	173959	174005	.	+	.	ID=DT05679-RA:exon:2817;Parent=DT05679-RA,DT05679-RB,DT05679-RC;
jcf7180002375876_pilon	maker	exon	175823	175928	.	+	.	ID=DT05679-RA:exon:2818;Parent=DT05679-RA,DT05679-RB,DT05679-RC;
jcf7180002375876_pilon	maker	exon	176149	176266	.	+	.	ID=DT05679-RA:exon:2819;Parent=DT05679-RA,DT05679-RB,DT05679-RC;
jcf7180002375876_pilon	maker	exon	178413	178526	.	+	.	ID=DT05679-RA:exon:2820;Parent=DT05679-RA,DT05679-RB,DT05679-RC;
jcf7180002375876_pilon	maker	exon	178701	178777	.	+	.	ID=DT05679-RA:exon:2821;Parent=DT05679-RA,DT05679-RB,DT05679-RC;
jcf7180002375876_pilon	maker	exon	178851	179004	.	+	.	ID=DT05679-RA:exon:2822;Parent=DT05679-RA,DT05679-RB,DT05679-RC;
jcf7180002375876_pilon	maker	exon	179079	179238	.	+	.	ID=DT05679-RA:exon:2823;Parent=DT05679-RA,DT05679-RB,DT05679-RC;
jcf7180002375876_pilon	maker	exon	179308	179391	.	+	.	ID=DT05679-RA:exon:2824;Parent=DT05679-RA,DT05679-RB,DT05679-RC;
jcf7180002375876_pilon	maker	exon	180670	180763	.	+	.	ID=DT05679-RA:exon:2825;Parent=DT05679-RA,DT05679-RB,DT05679-RC;
jcf7180002375876_pilon	maker	exon	180846	180901	.	+	.	ID=DT05679-RA:exon:2826;Parent=DT05679-RA,DT05679-RB,DT05679-RC;
jcf7180002375876_pilon	maker	exon	182393	182528	.	+	.	ID=DT05679-RA:exon:2827;Parent=DT05679-RA,DT05679-RB,DT05679-RC;
jcf7180002375876_pilon	maker	exon	182931	183001	.	+	.	ID=DT05679-RA:exon:2828;Parent=DT05679-RA,DT05679-RB,DT05679-RC;
jcf7180002375876_pilon	maker	exon	183820	183917	.	+	.	ID=DT05679-RA:exon:2829;Parent=DT05679-RA,DT05679-RB,DT05679-RC;
jcf7180002375876_pilon	maker	exon	186099	186198	.	+	.	ID=DT05679-RA:exon:2830;Parent=DT05679-RA,DT05679-RB,DT05679-RC;
jcf7180002375876_pilon	maker	exon	186285	187655	.	+	.	ID=DT05679-RA:exon:2831;Parent=DT05679-RA,DT05679-RB,DT05679-RC;
jcf7180002375876_pilon	maker	exon	160057	160212	.	+	.	ID=DT05679-RB:exon:2832;Parent=DT05679-RB,DT05679-RC;
jcf7180002375876_pilon	maker	exon	159882	159932	.	+	.	ID=DT05679-RC:exon:2833;Parent=DT05679-RC;
jcf7180002375876_pilon	maker	exon	201011	201087	.	+	.	ID=DT05681-RD:exon:2834;Parent=DT05681-RD,DT05681-RE,DT05681-RC;
jcf7180002375876_pilon	maker	exon	201117	201299	.	+	.	ID=DT05681-RD:exon:2835;Parent=DT05681-RD,DT05681-RE,DT05681-RC;
jcf7180002375876_pilon	maker	exon	202242	202252	.	+	.	ID=DT05681-RD:exon:2836;Parent=DT05681-RD,DT05681-RE,DT05681-RC;
jcf7180002375876_pilon	maker	exon	202302	202463	.	+	.	ID=DT05681-RD:exon:2837;Parent=DT05681-RD,DT05681-RE,DT05681-RC;
jcf7180002375876_pilon	maker	exon	207075	207303	.	+	.	ID=DT05681-RD:exon:2838;Parent=DT05681-RD,DT05681-RE,DT05681-RA,DT05681-RB;
jcf7180002375876_pilon	maker	exon	207415	207470	.	+	.	ID=DT05681-RD:exon:2839;Parent=DT05681-RD,DT05681-RE,DT05681-RA,DT05681-RB;
jcf7180002375876_pilon	maker	exon	207561	207637	.	+	.	ID=DT05681-RD:exon:2840;Parent=DT05681-RD,DT05681-RE,DT05681-RC,DT05681-RA,DT05681-RB;
jcf7180002375876_pilon	maker	exon	216413	216505	.	+	.	ID=DT05681-RD:exon:2841;Parent=DT05681-RD,DT05681-RE,DT05681-RC,DT05681-RA,DT05681-RB;
jcf7180002375876_pilon	maker	exon	216582	216715	.	+	.	ID=DT05681-RD:exon:2842;Parent=DT05681-RD,DT05681-RE,DT05681-RC,DT05681-RA,DT05681-RB;
jcf7180002375876_pilon	maker	exon	217938	218122	.	+	.	ID=DT05681-RD:exon:2843;Parent=DT05681-RD,DT05681-RE,DT05681-RC,DT05681-RA,DT05681-RB;
jcf7180002375876_pilon	maker	exon	220353	220496	.	+	.	ID=DT05681-RD:exon:2844;Parent=DT05681-RD,DT05681-RE,DT05681-RC,DT05681-RA,DT05681-RB;
jcf7180002375876_pilon	maker	exon	222656	222782	.	+	.	ID=DT05681-RD:exon:2845;Parent=DT05681-RD,DT05681-RE,DT05681-RC,DT05681-RA,DT05681-RB;
jcf7180002375876_pilon	maker	exon	222878	223010	.	+	.	ID=DT05681-RD:exon:2846;Parent=DT05681-RD,DT05681-RE,DT05681-RC,DT05681-RA,DT05681-RB;
jcf7180002375876_pilon	maker	exon	223220	223246	.	+	.	ID=DT05681-RD:exon:2847;Parent=DT05681-RD,DT05681-RE,DT05681-RC,DT05681-RA,DT05681-RB;
jcf7180002375876_pilon	maker	exon	224188	224295	.	+	.	ID=DT05681-RD:exon:2848;Parent=DT05681-RD,DT05681-RE,DT05681-RC,DT05681-RA,DT05681-RB;
jcf7180002375876_pilon	maker	exon	226313	228577	.	+	.	ID=DT05681-RD:exon:2849;Parent=DT05681-RD,DT05681-RC,DT05681-RA;
jcf7180002375876_pilon	maker	exon	228625	230268	.	+	.	ID=DT05681-RD:exon:2850;Parent=DT05681-RD,DT05681-RC,DT05681-RA;
jcf7180002375876_pilon	maker	exon	226313	230660	.	+	.	ID=DT05681-RE:exon:2851;Parent=DT05681-RE,DT05681-RB;
jcf7180002375876_pilon	maker	exon	207075	207254	.	+	.	ID=DT05681-RC:exon:2852;Parent=DT05681-RC;
jcf7180002375876_pilon	maker	exon	200096	200225	.	+	.	ID=DT05681-RA:exon:2853;Parent=DT05681-RA,DT05681-RB;
jcf7180002375876_pilon	maker	exon	202242	202463	.	+	.	ID=DT05681-RA:exon:2854;Parent=DT05681-RA,DT05681-RB;
jcf7180002375876_pilon	maker	exon	121000	121191	.	-	.	ID=DT05678-RA:exon:2903;Parent=DT05678-RA;
jcf7180002375876_pilon	maker	exon	117120	117248	.	-	.	ID=DT05678-RB:exon:2902;Parent=DT05678-RB;
jcf7180002375876_pilon	maker	exon	119852	120039	.	-	.	ID=DT05678-RB:exon:2901;Parent=DT05678-RB;
jcf7180002375876_pilon	maker	exon	120528	120672	.	-	.	ID=DT05678-RB:exon:2900;Parent=DT05678-RB;
jcf7180002375876_pilon	maker	exon	117709	117724	.	-	.	ID=DT05678-RD:exon:2899;Parent=DT05678-RD;
jcf7180002375876_pilon	maker	exon	118758	118823	.	-	.	ID=DT05678-RC:exon:2898;Parent=DT05678-RC;
jcf7180002375876_pilon	maker	exon	109156	109236	.	-	.	ID=DT05678-RE:exon:2897;Parent=DT05678-RE;
jcf7180002375876_pilon	maker	exon	105468	106554	.	-	.	ID=DT05678-RF:exon:2896;Parent=DT05678-RF,DT05678-RE,DT05678-RC,DT05678-RD,DT05678-RB,DT05678-RA;
jcf7180002375876_pilon	maker	exon	106651	106853	.	-	.	ID=DT05678-RF:exon:2895;Parent=DT05678-RF,DT05678-RE,DT05678-RC,DT05678-RD,DT05678-RB,DT05678-RA;
jcf7180002375876_pilon	maker	exon	106927	107066	.	-	.	ID=DT05678-RF:exon:2894;Parent=DT05678-RF,DT05678-RE,DT05678-RC,DT05678-RD,DT05678-RB,DT05678-RA;
jcf7180002375876_pilon	maker	exon	107155	107295	.	-	.	ID=DT05678-RF:exon:2893;Parent=DT05678-RF,DT05678-RE,DT05678-RC,DT05678-RD,DT05678-RB,DT05678-RA;
jcf7180002375876_pilon	maker	exon	108038	108179	.	-	.	ID=DT05678-RF:exon:2892;Parent=DT05678-RF,DT05678-RE,DT05678-RC,DT05678-RD,DT05678-RB,DT05678-RA;
jcf7180002375876_pilon	maker	exon	108264	108503	.	-	.	ID=DT05678-RF:exon:2891;Parent=DT05678-RF,DT05678-RE,DT05678-RC,DT05678-RD,DT05678-RB,DT05678-RA;
jcf7180002375876_pilon	maker	exon	108576	108769	.	-	.	ID=DT05678-RF:exon:2890;Parent=DT05678-RF,DT05678-RE,DT05678-RC,DT05678-RD,DT05678-RB,DT05678-RA;
jcf7180002375876_pilon	maker	exon	108844	109017	.	-	.	ID=DT05678-RF:exon:2889;Parent=DT05678-RF,DT05678-RE,DT05678-RC,DT05678-RD,DT05678-RB,DT05678-RA;
jcf7180002375876_pilon	maker	exon	109123	109236	.	-	.	ID=DT05678-RF:exon:2888;Parent=DT05678-RF,DT05678-RC,DT05678-RD,DT05678-RB,DT05678-RA;
jcf7180002375876_pilon	maker	exon	109324	109452	.	-	.	ID=DT05678-RF:exon:2887;Parent=DT05678-RF,DT05678-RE,DT05678-RC,DT05678-RD,DT05678-RB,DT05678-RA;
jcf7180002375876_pilon	maker	exon	109571	109784	.	-	.	ID=DT05678-RF:exon:2886;Parent=DT05678-RF,DT05678-RE,DT05678-RC,DT05678-RD,DT05678-RB,DT05678-RA;
jcf7180002375876_pilon	maker	exon	109862	110053	.	-	.	ID=DT05678-RF:exon:2885;Parent=DT05678-RF,DT05678-RE,DT05678-RC,DT05678-RD,DT05678-RB,DT05678-RA;
jcf7180002375876_pilon	maker	exon	111362	111522	.	-	.	ID=DT05678-RF:exon:2884;Parent=DT05678-RF,DT05678-RE,DT05678-RC,DT05678-RD,DT05678-RB,DT05678-RA;
jcf7180002375876_pilon	maker	exon	111615	111761	.	-	.	ID=DT05678-RF:exon:2883;Parent=DT05678-RF,DT05678-RE,DT05678-RC,DT05678-RD,DT05678-RB,DT05678-RA;
jcf7180002375876_pilon	maker	exon	111846	111975	.	-	.	ID=DT05678-RF:exon:2882;Parent=DT05678-RF,DT05678-RE,DT05678-RC,DT05678-RD,DT05678-RB,DT05678-RA;
jcf7180002375876_pilon	maker	exon	112138	112307	.	-	.	ID=DT05678-RF:exon:2881;Parent=DT05678-RF,DT05678-RE,DT05678-RC,DT05678-RD,DT05678-RB,DT05678-RA;
jcf7180002375876_pilon	maker	exon	112392	112527	.	-	.	ID=DT05678-RF:exon:2880;Parent=DT05678-RF,DT05678-RE,DT05678-RC,DT05678-RD,DT05678-RB,DT05678-RA;
jcf7180002375876_pilon	maker	exon	112605	112784	.	-	.	ID=DT05678-RF:exon:2879;Parent=DT05678-RF,DT05678-RE,DT05678-RC,DT05678-RD,DT05678-RB,DT05678-RA;
jcf7180002375876_pilon	maker	exon	113927	114174	.	-	.	ID=DT05678-RF:exon:2878;Parent=DT05678-RF,DT05678-RE,DT05678-RC,DT05678-RD,DT05678-RB,DT05678-RA;
jcf7180002375876_pilon	maker	exon	114260	114376	.	-	.	ID=DT05678-RF:exon:2877;Parent=DT05678-RF,DT05678-RE,DT05678-RC,DT05678-RD,DT05678-RB,DT05678-RA;
jcf7180002375876_pilon	maker	exon	114448	114658	.	-	.	ID=DT05678-RF:exon:2876;Parent=DT05678-RF,DT05678-RE,DT05678-RC,DT05678-RD,DT05678-RB,DT05678-RA;
jcf7180002375876_pilon	maker	exon	114739	114885	.	-	.	ID=DT05678-RF:exon:2875;Parent=DT05678-RF,DT05678-RE,DT05678-RC,DT05678-RD,DT05678-RB,DT05678-RA;
jcf7180002375876_pilon	maker	exon	114956	115194	.	-	.	ID=DT05678-RF:exon:2874;Parent=DT05678-RF,DT05678-RE,DT05678-RC,DT05678-RD,DT05678-RB,DT05678-RA;
jcf7180002375876_pilon	maker	exon	115277	115464	.	-	.	ID=DT05678-RF:exon:2873;Parent=DT05678-RF,DT05678-RE,DT05678-RC,DT05678-RD,DT05678-RB,DT05678-RA;
jcf7180002375876_pilon	maker	exon	115932	116124	.	-	.	ID=DT05678-RF:exon:2872;Parent=DT05678-RF,DT05678-RE,DT05678-RC,DT05678-RD,DT05678-RB,DT05678-RA;
jcf7180002375876_pilon	maker	exon	116213	116311	.	-	.	ID=DT05678-RF:exon:2871;Parent=DT05678-RF,DT05678-RE,DT05678-RC,DT05678-RD,DT05678-RB,DT05678-RA;
jcf7180002375876_pilon	maker	exon	116919	116969	.	-	.	ID=DT05678-RF:exon:2870;Parent=DT05678-RF,DT05678-RE,DT05678-RC,DT05678-RD,DT05678-RB,DT05678-RA;
jcf7180002375876_pilon	maker	exon	117042	117248	.	-	.	ID=DT05678-RF:exon:2869;Parent=DT05678-RF,DT05678-RE,DT05678-RC,DT05678-RD,DT05678-RA;
jcf7180002375876_pilon	maker	exon	117320	117516	.	-	.	ID=DT05678-RF:exon:2868;Parent=DT05678-RF,DT05678-RE,DT05678-RC,DT05678-RD,DT05678-RB,DT05678-RA;
jcf7180002375876_pilon	maker	exon	117595	117724	.	-	.	ID=DT05678-RF:exon:2867;Parent=DT05678-RF,DT05678-RE,DT05678-RC,DT05678-RB,DT05678-RA;
jcf7180002375876_pilon	maker	exon	117827	117961	.	-	.	ID=DT05678-RF:exon:2866;Parent=DT05678-RF,DT05678-RE,DT05678-RC,DT05678-RD,DT05678-RB,DT05678-RA;
jcf7180002375876_pilon	maker	exon	118307	118616	.	-	.	ID=DT05678-RF:exon:2865;Parent=DT05678-RF,DT05678-RE,DT05678-RC,DT05678-RD,DT05678-RB,DT05678-RA;
jcf7180002375876_pilon	maker	exon	118704	118823	.	-	.	ID=DT05678-RF:exon:2864;Parent=DT05678-RF,DT05678-RE,DT05678-RD,DT05678-RB,DT05678-RA;
jcf7180002375876_pilon	maker	exon	118916	119106	.	-	.	ID=DT05678-RF:exon:2863;Parent=DT05678-RF,DT05678-RE,DT05678-RC,DT05678-RD,DT05678-RB,DT05678-RA;
jcf7180002375876_pilon	maker	exon	119185	119290	.	-	.	ID=DT05678-RF:exon:2862;Parent=DT05678-RF,DT05678-RE,DT05678-RC,DT05678-RD,DT05678-RB,DT05678-RA;
jcf7180002375876_pilon	maker	exon	119367	119492	.	-	.	ID=DT05678-RF:exon:2861;Parent=DT05678-RF,DT05678-RE,DT05678-RC,DT05678-RD,DT05678-RB,DT05678-RA;
jcf7180002375876_pilon	maker	exon	119564	119776	.	-	.	ID=DT05678-RF:exon:2860;Parent=DT05678-RF,DT05678-RE,DT05678-RC,DT05678-RD,DT05678-RB,DT05678-RA;
jcf7180002375876_pilon	maker	exon	119852	120070	.	-	.	ID=DT05678-RF:exon:2859;Parent=DT05678-RF,DT05678-RE,DT05678-RC,DT05678-RD,DT05678-RA;
jcf7180002375876_pilon	maker	exon	120508	120672	.	-	.	ID=DT05678-RF:exon:2858;Parent=DT05678-RF,DT05678-RE,DT05678-RC,DT05678-RD,DT05678-RA;
jcf7180002375876_pilon	maker	exon	120751	120919	.	-	.	ID=DT05678-RF:exon:2857;Parent=DT05678-RF,DT05678-RE,DT05678-RC,DT05678-RD,DT05678-RB,DT05678-RA;
jcf7180002375876_pilon	maker	exon	121000	121128	.	-	.	ID=DT05678-RF:exon:2856;Parent=DT05678-RF,DT05678-RE,DT05678-RC,DT05678-RD,DT05678-RB;
jcf7180002375876_pilon	maker	exon	121598	121682	.	-	.	ID=DT05678-RF:exon:2855;Parent=DT05678-RF,DT05678-RE,DT05678-RC,DT05678-RD,DT05678-RB;
jcf7180002375876_pilon	maker	exon	61626	61816	.	-	.	ID=DT05677-RA:exon:2935;Parent=DT05677-RA;
jcf7180002375876_pilon	maker	exon	61840	61866	.	-	.	ID=DT05677-RD:exon:2934;Parent=DT05677-RD;
jcf7180002375876_pilon	maker	exon	43794	46106	.	-	.	ID=DT05677-RC:exon:2933;Parent=DT05677-RC;
jcf7180002375876_pilon	maker	exon	43794	45386	.	-	.	ID=DT05677-RB:exon:2932;Parent=DT05677-RB,DT05677-RA;
jcf7180002375876_pilon	maker	exon	45409	46106	.	-	.	ID=DT05677-RB:exon:2931;Parent=DT05677-RB,DT05677-RA;
jcf7180002375876_pilon	maker	exon	46786	48227	.	-	.	ID=DT05677-RB:exon:2930;Parent=DT05677-RB,DT05677-RC,DT05677-RA;
jcf7180002375876_pilon	maker	exon	51287	51374	.	-	.	ID=DT05677-RB:exon:2929;Parent=DT05677-RB,DT05677-RC,DT05677-RA;
jcf7180002375876_pilon	maker	exon	52626	52782	.	-	.	ID=DT05677-RB:exon:2928;Parent=DT05677-RB,DT05677-RC,DT05677-RA;
jcf7180002375876_pilon	maker	exon	53731	53813	.	-	.	ID=DT05677-RB:exon:2927;Parent=DT05677-RB,DT05677-RC,DT05677-RA;
jcf7180002375876_pilon	maker	exon	54171	54266	.	-	.	ID=DT05677-RB:exon:2926;Parent=DT05677-RB,DT05677-RC,DT05677-RA;
jcf7180002375876_pilon	maker	exon	56327	56500	.	-	.	ID=DT05677-RB:exon:2925;Parent=DT05677-RB,DT05677-RC,DT05677-RA;
jcf7180002375876_pilon	maker	exon	56929	57103	.	-	.	ID=DT05677-RB:exon:2924;Parent=DT05677-RB,DT05677-RC,DT05677-RA;
jcf7180002375876_pilon	maker	exon	57409	57554	.	-	.	ID=DT05677-RB:exon:2923;Parent=DT05677-RB,DT05677-RC,DT05677-RA;
jcf7180002375876_pilon	maker	exon	59986	60100	.	-	.	ID=DT05677-RB:exon:2922;Parent=DT05677-RB,DT05677-RC,DT05677-RA;
jcf7180002375876_pilon	maker	exon	60167	60282	.	-	.	ID=DT05677-RB:exon:2921;Parent=DT05677-RB,DT05677-RC,DT05677-RA;
jcf7180002375876_pilon	maker	exon	60363	60501	.	-	.	ID=DT05677-RB:exon:2920;Parent=DT05677-RB,DT05677-RC,DT05677-RA;
jcf7180002375876_pilon	maker	exon	61077	61230	.	-	.	ID=DT05677-RB:exon:2919;Parent=DT05677-RB,DT05677-RC,DT05677-RA;
jcf7180002375876_pilon	maker	exon	61626	61780	.	-	.	ID=DT05677-RB:exon:2918;Parent=DT05677-RB,DT05677-RC;
jcf7180002375876_pilon	maker	exon	63448	63626	.	-	.	ID=DT05677-RB:exon:2917;Parent=DT05677-RB,DT05677-RC,DT05677-RD;
jcf7180002375876_pilon	maker	exon	65307	65615	.	-	.	ID=DT05677-RB:exon:2916;Parent=DT05677-RB,DT05677-RC,DT05677-RD;
jcf7180002375876_pilon	maker	exon	65696	65887	.	-	.	ID=DT05677-RB:exon:2915;Parent=DT05677-RB,DT05677-RC,DT05677-RD;
jcf7180002375876_pilon	maker	exon	67456	67559	.	-	.	ID=DT05677-RB:exon:2914;Parent=DT05677-RB,DT05677-RC,DT05677-RD;
jcf7180002375876_pilon	maker	exon	68579	68711	.	-	.	ID=DT05677-RB:exon:2913;Parent=DT05677-RB,DT05677-RC,DT05677-RD;
jcf7180002375876_pilon	maker	exon	69037	69152	.	-	.	ID=DT05677-RB:exon:2912;Parent=DT05677-RB,DT05677-RC,DT05677-RD;
jcf7180002375876_pilon	maker	exon	69226	69466	.	-	.	ID=DT05677-RB:exon:2911;Parent=DT05677-RB,DT05677-RC,DT05677-RD;
jcf7180002375876_pilon	maker	exon	70892	71083	.	-	.	ID=DT05677-RB:exon:2910;Parent=DT05677-RB,DT05677-RC,DT05677-RD;
jcf7180002375876_pilon	maker	exon	73025	73225	.	-	.	ID=DT05677-RB:exon:2909;Parent=DT05677-RB,DT05677-RC,DT05677-RD;
jcf7180002375876_pilon	maker	exon	73457	73612	.	-	.	ID=DT05677-RB:exon:2908;Parent=DT05677-RB,DT05677-RC,DT05677-RD;
jcf7180002375876_pilon	maker	exon	73969	74129	.	-	.	ID=DT05677-RB:exon:2907;Parent=DT05677-RB,DT05677-RC,DT05677-RD;
jcf7180002375876_pilon	maker	exon	75212	75460	.	-	.	ID=DT05677-RB:exon:2906;Parent=DT05677-RB,DT05677-RC,DT05677-RD;
jcf7180002375876_pilon	maker	exon	76812	77640	.	-	.	ID=DT05677-RB:exon:2905;Parent=DT05677-RB,DT05677-RC,DT05677-RD;
jcf7180002375876_pilon	maker	exon	83188	83425	.	-	.	ID=DT05677-RB:exon:2904;Parent=DT05677-RB,DT05677-RC,DT05677-RD;
jcf7180002375876_pilon	maker	exon	16121	16894	.	-	.	ID=DT05676-RA:exon:2948;Parent=DT05676-RA;
jcf7180002375876_pilon	maker	exon	4041	5185	.	-	.	ID=DT05676-RB:exon:2947;Parent=DT05676-RB,DT05676-RC,DT05676-RA;
jcf7180002375876_pilon	maker	exon	8719	8886	.	-	.	ID=DT05676-RB:exon:2946;Parent=DT05676-RB,DT05676-RC,DT05676-RA;
jcf7180002375876_pilon	maker	exon	8960	9082	.	-	.	ID=DT05676-RB:exon:2945;Parent=DT05676-RB,DT05676-RC,DT05676-RA;
jcf7180002375876_pilon	maker	exon	10184	10239	.	-	.	ID=DT05676-RB:exon:2944;Parent=DT05676-RB,DT05676-RC,DT05676-RA;
jcf7180002375876_pilon	maker	exon	10424	10601	.	-	.	ID=DT05676-RB:exon:2943;Parent=DT05676-RB,DT05676-RC,DT05676-RA;
jcf7180002375876_pilon	maker	exon	12944	13071	.	-	.	ID=DT05676-RB:exon:2942;Parent=DT05676-RB,DT05676-RC,DT05676-RA;
jcf7180002375876_pilon	maker	exon	13159	13310	.	-	.	ID=DT05676-RB:exon:2941;Parent=DT05676-RB,DT05676-RC,DT05676-RA;
jcf7180002375876_pilon	maker	exon	15449	15570	.	-	.	ID=DT05676-RB:exon:2940;Parent=DT05676-RB,DT05676-RC,DT05676-RA;
jcf7180002375876_pilon	maker	exon	15647	15771	.	-	.	ID=DT05676-RB:exon:2939;Parent=DT05676-RB,DT05676-RC,DT05676-RA;
jcf7180002375876_pilon	maker	exon	16121	16250	.	-	.	ID=DT05676-RB:exon:2938;Parent=DT05676-RB,DT05676-RC;
jcf7180002375876_pilon	maker	exon	17894	18066	.	-	.	ID=DT05676-RB:exon:2937;Parent=DT05676-RB;
jcf7180002375876_pilon	maker	exon	19154	19310	.	-	.	ID=DT05676-RB:exon:2936;Parent=DT05676-RB,DT05676-RC;
jcf7180002375876_pilon	maker	exon	732660	732907	.	+	.	ID=DT05691-RB:exon:2949;Parent=DT05691-RB,DT05691-RA;
jcf7180002375876_pilon	maker	exon	733404	733523	.	+	.	ID=DT05691-RB:exon:2950;Parent=DT05691-RB,DT05691-RA;
jcf7180002375876_pilon	maker	exon	734946	735108	.	+	.	ID=DT05691-RB:exon:2951;Parent=DT05691-RB,DT05691-RA;
jcf7180002375876_pilon	maker	exon	736328	736485	.	+	.	ID=DT05691-RB:exon:2952;Parent=DT05691-RB,DT05691-RA;
jcf7180002375876_pilon	maker	exon	737144	737272	.	+	.	ID=DT05691-RB:exon:2953;Parent=DT05691-RB,DT05691-RA;
jcf7180002375876_pilon	maker	exon	737346	737480	.	+	.	ID=DT05691-RB:exon:2954;Parent=DT05691-RB,DT05691-RA;
jcf7180002375876_pilon	maker	exon	738503	738635	.	+	.	ID=DT05691-RB:exon:2955;Parent=DT05691-RB,DT05691-RA;
jcf7180002375876_pilon	maker	exon	738727	738836	.	+	.	ID=DT05691-RB:exon:2956;Parent=DT05691-RB,DT05691-RA;
jcf7180002375876_pilon	maker	exon	738930	739055	.	+	.	ID=DT05691-RB:exon:2957;Parent=DT05691-RB,DT05691-RA;
jcf7180002375876_pilon	maker	exon	740358	740407	.	+	.	ID=DT05691-RB:exon:2958;Parent=DT05691-RB,DT05691-RA;
jcf7180002375876_pilon	maker	exon	741680	741880	.	+	.	ID=DT05691-RB:exon:2959;Parent=DT05691-RB,DT05691-RA;
jcf7180002375876_pilon	maker	exon	743857	743991	.	+	.	ID=DT05691-RB:exon:2960;Parent=DT05691-RB,DT05691-RA;
jcf7180002375876_pilon	maker	exon	744274	744400	.	+	.	ID=DT05691-RB:exon:2961;Parent=DT05691-RB;
jcf7180002375876_pilon	maker	exon	746277	746713	.	+	.	ID=DT05691-RB:exon:2962;Parent=DT05691-RB;
jcf7180002375876_pilon	maker	exon	746734	747481	.	+	.	ID=DT05691-RB:exon:2963;Parent=DT05691-RB,DT05691-RA;
jcf7180002375876_pilon	maker	exon	744274	746713	.	+	.	ID=DT05691-RA:exon:2964;Parent=DT05691-RA;
jcf7180002375876_pilon	maker	exon	631475	631667	.	+	.	ID=DT05687-RA:exon:2965;Parent=DT05687-RA;
jcf7180002375876_pilon	maker	exon	631768	631832	.	+	.	ID=DT05687-RA:exon:2966;Parent=DT05687-RA;
jcf7180002375876_pilon	maker	exon	631943	632065	.	+	.	ID=DT05687-RA:exon:2967;Parent=DT05687-RA;
jcf7180002375876_pilon	maker	exon	634821	634878	.	+	.	ID=DT05687-RA:exon:2968;Parent=DT05687-RA;
jcf7180002375876_pilon	maker	exon	635336	635450	.	+	.	ID=DT05687-RA:exon:2969;Parent=DT05687-RA;
jcf7180002375876_pilon	maker	exon	635552	635656	.	+	.	ID=DT05687-RA:exon:2970;Parent=DT05687-RA;
jcf7180002375876_pilon	maker	exon	637200	637291	.	+	.	ID=DT05687-RA:exon:2971;Parent=DT05687-RA;
jcf7180002375876_pilon	maker	exon	637366	637476	.	+	.	ID=DT05687-RA:exon:2972;Parent=DT05687-RA;
jcf7180002375876_pilon	maker	exon	638794	639549	.	+	.	ID=DT05687-RA:exon:2973;Parent=DT05687-RA;
jcf7180002375876_pilon	maker	exon	232527	232774	.	+	.	ID=DT05682-RA:exon:2974;Parent=DT05682-RA;
jcf7180002375876_pilon	maker	exon	233937	233967	.	+	.	ID=DT05682-RA:exon:2975;Parent=DT05682-RA;
jcf7180002375876_pilon	maker	exon	236047	236192	.	+	.	ID=DT05682-RA:exon:2976;Parent=DT05682-RA;
jcf7180002375876_pilon	maker	exon	236263	236354	.	+	.	ID=DT05682-RA:exon:2977;Parent=DT05682-RA,DT05682-RB,DT05682-RC;
jcf7180002375876_pilon	maker	exon	237089	237096	.	+	.	ID=DT05682-RA:exon:2978;Parent=DT05682-RA,DT05682-RB,DT05682-RC;
jcf7180002375876_pilon	maker	exon	237196	237270	.	+	.	ID=DT05682-RA:exon:2979;Parent=DT05682-RA,DT05682-RB,DT05682-RC;
jcf7180002375876_pilon	maker	exon	237365	237448	.	+	.	ID=DT05682-RA:exon:2980;Parent=DT05682-RA,DT05682-RB,DT05682-RC;
jcf7180002375876_pilon	maker	exon	238822	238899	.	+	.	ID=DT05682-RA:exon:2981;Parent=DT05682-RA,DT05682-RB,DT05682-RC;
jcf7180002375876_pilon	maker	exon	239013	239123	.	+	.	ID=DT05682-RA:exon:2982;Parent=DT05682-RA,DT05682-RB,DT05682-RC;
jcf7180002375876_pilon	maker	exon	239270	239392	.	+	.	ID=DT05682-RA:exon:2983;Parent=DT05682-RA,DT05682-RB,DT05682-RC;
jcf7180002375876_pilon	maker	exon	242432	242497	.	+	.	ID=DT05682-RA:exon:2984;Parent=DT05682-RA,DT05682-RB,DT05682-RC;
jcf7180002375876_pilon	maker	exon	242760	243442	.	+	.	ID=DT05682-RA:exon:2985;Parent=DT05682-RA,DT05682-RC;
jcf7180002375876_pilon	maker	exon	235602	236192	.	+	.	ID=DT05682-RB:exon:2986;Parent=DT05682-RB,DT05682-RC;
jcf7180002375876_pilon	maker	exon	242760	243039	.	+	.	ID=DT05682-RB:exon:2987;Parent=DT05682-RB;
jcf7180002375876_pilon	maker	exon	243062	243442	.	+	.	ID=DT05682-RB:exon:2988;Parent=DT05682-RB;
jcf7180002375876_pilon	maker	exon	642849	642938	.	+	.	ID=DT05689-RA:exon:2989;Parent=DT05689-RA;
jcf7180002375876_pilon	maker	exon	643222	643308	.	+	.	ID=DT05689-RA:exon:2990;Parent=DT05689-RA;
jcf7180002375876_pilon	maker	exon	643692	643770	.	+	.	ID=DT05689-RA:exon:2991;Parent=DT05689-RA;
jcf7180002375876_pilon	maker	exon	644772	644846	.	+	.	ID=DT05689-RA:exon:2992;Parent=DT05689-RA;
jcf7180002375876_pilon	maker	exon	645941	645986	.	+	.	ID=DT05689-RA:exon:2993;Parent=DT05689-RA;
jcf7180002375876_pilon	maker	exon	646099	646243	.	+	.	ID=DT05689-RA:exon:2994;Parent=DT05689-RA;
jcf7180002375876_pilon	maker	exon	646977	647031	.	+	.	ID=DT05689-RA:exon:2995;Parent=DT05689-RA;
jcf7180002375876_pilon	maker	exon	648417	648498	.	+	.	ID=DT05689-RA:exon:2996;Parent=DT05689-RA;
jcf7180002375876_pilon	maker	exon	648796	648927	.	+	.	ID=DT05689-RA:exon:2997;Parent=DT05689-RA;
jcf7180002375876_pilon	maker	exon	649127	649250	.	+	.	ID=DT05689-RA:exon:2998;Parent=DT05689-RA;
jcf7180002375876_pilon	maker	exon	649334	649390	.	+	.	ID=DT05689-RA:exon:2999;Parent=DT05689-RA;
jcf7180002375876_pilon	maker	exon	649474	649557	.	+	.	ID=DT05689-RA:exon:3000;Parent=DT05689-RA;
jcf7180002375876_pilon	maker	exon	358155	361442	.	-	.	ID=DT05686-RA:exon:3001;Parent=DT05686-RA;
jcf7180002375876_pilon	maker	exon	641113	641349	.	-	.	ID=DT05688-RA:exon:3052;Parent=DT05688-RA;
jcf7180002375876_pilon	maker	exon	641560	641608	.	-	.	ID=DT05688-RA:exon:3051;Parent=DT05688-RA;
jcf7180002375876_pilon	maker	exon	642848	642938	.	-	.	ID=DT05688-RA:exon:3050;Parent=DT05688-RA;
jcf7180002375876_pilon	maker	exon	643222	643308	.	-	.	ID=DT05688-RA:exon:3049;Parent=DT05688-RA;
jcf7180002375876_pilon	maker	exon	643692	643770	.	-	.	ID=DT05688-RA:exon:3048;Parent=DT05688-RA;
jcf7180002375876_pilon	maker	exon	644772	644850	.	-	.	ID=DT05688-RA:exon:3047;Parent=DT05688-RA;
jcf7180002375876_pilon	maker	exon	645945	645986	.	-	.	ID=DT05688-RA:exon:3046;Parent=DT05688-RA;
jcf7180002375876_pilon	maker	exon	646099	646241	.	-	.	ID=DT05688-RA:exon:3045;Parent=DT05688-RA;
jcf7180002375876_pilon	maker	exon	646975	647031	.	-	.	ID=DT05688-RA:exon:3044;Parent=DT05688-RA;
jcf7180002375876_pilon	maker	exon	648417	648500	.	-	.	ID=DT05688-RA:exon:3043;Parent=DT05688-RA;
jcf7180002375876_pilon	maker	exon	648796	648922	.	-	.	ID=DT05688-RA:exon:3042;Parent=DT05688-RA;
jcf7180002375876_pilon	maker	exon	649124	649248	.	-	.	ID=DT05688-RA:exon:3041;Parent=DT05688-RA;
jcf7180002375876_pilon	maker	exon	649332	649390	.	-	.	ID=DT05688-RA:exon:3040;Parent=DT05688-RA;
jcf7180002375876_pilon	maker	exon	649474	650581	.	-	.	ID=DT05688-RA:exon:3039;Parent=DT05688-RA;
jcf7180002375876_pilon	maker	exon	651923	652046	.	-	.	ID=DT05688-RA:exon:3038;Parent=DT05688-RA;
jcf7180002375876_pilon	maker	exon	652152	652244	.	-	.	ID=DT05688-RA:exon:3037;Parent=DT05688-RA;
jcf7180002375876_pilon	maker	exon	652315	652469	.	-	.	ID=DT05688-RA:exon:3036;Parent=DT05688-RA;
jcf7180002375876_pilon	maker	exon	652552	652621	.	-	.	ID=DT05688-RA:exon:3035;Parent=DT05688-RA;
jcf7180002375876_pilon	maker	exon	652701	652852	.	-	.	ID=DT05688-RA:exon:3034;Parent=DT05688-RA;
jcf7180002375876_pilon	maker	exon	653114	653234	.	-	.	ID=DT05688-RA:exon:3033;Parent=DT05688-RA;
jcf7180002375876_pilon	maker	exon	654733	654792	.	-	.	ID=DT05688-RA:exon:3032;Parent=DT05688-RA;
jcf7180002375876_pilon	maker	exon	654880	655077	.	-	.	ID=DT05688-RA:exon:3031;Parent=DT05688-RA;
jcf7180002375876_pilon	maker	exon	655198	655332	.	-	.	ID=DT05688-RA:exon:3030;Parent=DT05688-RA;
jcf7180002375876_pilon	maker	exon	655420	655514	.	-	.	ID=DT05688-RA:exon:3029;Parent=DT05688-RA;
jcf7180002375876_pilon	maker	exon	656283	656414	.	-	.	ID=DT05688-RA:exon:3028;Parent=DT05688-RA;
jcf7180002375876_pilon	maker	exon	656571	656700	.	-	.	ID=DT05688-RA:exon:3027;Parent=DT05688-RA;
jcf7180002375876_pilon	maker	exon	657492	657623	.	-	.	ID=DT05688-RA:exon:3026;Parent=DT05688-RA;
jcf7180002375876_pilon	maker	exon	657703	657875	.	-	.	ID=DT05688-RA:exon:3025;Parent=DT05688-RA;
jcf7180002375876_pilon	maker	exon	659309	659476	.	-	.	ID=DT05688-RA:exon:3024;Parent=DT05688-RA;
jcf7180002375876_pilon	maker	exon	659562	659905	.	-	.	ID=DT05688-RA:exon:3023;Parent=DT05688-RA;
jcf7180002375876_pilon	maker	exon	660846	661005	.	-	.	ID=DT05688-RA:exon:3022;Parent=DT05688-RA;
jcf7180002375876_pilon	maker	exon	661105	661265	.	-	.	ID=DT05688-RA:exon:3021;Parent=DT05688-RA;
jcf7180002375876_pilon	maker	exon	661914	662059	.	-	.	ID=DT05688-RA:exon:3020;Parent=DT05688-RA;
jcf7180002375876_pilon	maker	exon	662147	662423	.	-	.	ID=DT05688-RA:exon:3019;Parent=DT05688-RA;
jcf7180002375876_pilon	maker	exon	662497	662679	.	-	.	ID=DT05688-RA:exon:3018;Parent=DT05688-RA;
jcf7180002375876_pilon	maker	exon	662749	662900	.	-	.	ID=DT05688-RA:exon:3017;Parent=DT05688-RA;
jcf7180002375876_pilon	maker	exon	664024	664185	.	-	.	ID=DT05688-RA:exon:3016;Parent=DT05688-RA;
jcf7180002375876_pilon	maker	exon	664274	664403	.	-	.	ID=DT05688-RA:exon:3015;Parent=DT05688-RA;
jcf7180002375876_pilon	maker	exon	664493	664611	.	-	.	ID=DT05688-RA:exon:3014;Parent=DT05688-RA;
jcf7180002375876_pilon	maker	exon	664720	664934	.	-	.	ID=DT05688-RA:exon:3013;Parent=DT05688-RA;
jcf7180002375876_pilon	maker	exon	665059	665222	.	-	.	ID=DT05688-RA:exon:3012;Parent=DT05688-RA;
jcf7180002375876_pilon	maker	exon	666145	666333	.	-	.	ID=DT05688-RA:exon:3011;Parent=DT05688-RA;
jcf7180002375876_pilon	maker	exon	666434	666581	.	-	.	ID=DT05688-RA:exon:3010;Parent=DT05688-RA;
jcf7180002375876_pilon	maker	exon	666705	666951	.	-	.	ID=DT05688-RA:exon:3009;Parent=DT05688-RA;
jcf7180002375876_pilon	maker	exon	667031	667140	.	-	.	ID=DT05688-RA:exon:3008;Parent=DT05688-RA;
jcf7180002375876_pilon	maker	exon	667218	667395	.	-	.	ID=DT05688-RA:exon:3007;Parent=DT05688-RA;
jcf7180002375876_pilon	maker	exon	669173	669313	.	-	.	ID=DT05688-RA:exon:3006;Parent=DT05688-RA;
jcf7180002375876_pilon	maker	exon	669764	669934	.	-	.	ID=DT05688-RA:exon:3005;Parent=DT05688-RA;
jcf7180002375876_pilon	maker	exon	670487	670768	.	-	.	ID=DT05688-RA:exon:3004;Parent=DT05688-RA;
jcf7180002375876_pilon	maker	exon	670870	671105	.	-	.	ID=DT05688-RA:exon:3003;Parent=DT05688-RA;
jcf7180002375876_pilon	maker	exon	671774	671831	.	-	.	ID=DT05688-RA:exon:3002;Parent=DT05688-RA;
jcf7180002375876_pilon	maker	exon	284592	284885	.	-	.	ID=DT05684-RA:exon:3066;Parent=DT05684-RA;
jcf7180002375876_pilon	maker	exon	286100	286243	.	-	.	ID=DT05684-RA:exon:3065;Parent=DT05684-RA;
jcf7180002375876_pilon	maker	exon	286320	286457	.	-	.	ID=DT05684-RA:exon:3064;Parent=DT05684-RA;
jcf7180002375876_pilon	maker	exon	287336	287550	.	-	.	ID=DT05684-RA:exon:3063;Parent=DT05684-RA;
jcf7180002375876_pilon	maker	exon	289024	289413	.	-	.	ID=DT05684-RA:exon:3062;Parent=DT05684-RA;
jcf7180002375876_pilon	maker	exon	291901	292134	.	-	.	ID=DT05684-RA:exon:3061;Parent=DT05684-RA;
jcf7180002375876_pilon	maker	exon	295058	295211	.	-	.	ID=DT05684-RA:exon:3060;Parent=DT05684-RA;
jcf7180002375876_pilon	maker	exon	295631	295827	.	-	.	ID=DT05684-RA:exon:3059;Parent=DT05684-RA;
jcf7180002375876_pilon	maker	exon	297470	301540	.	-	.	ID=DT05684-RA:exon:3058;Parent=DT05684-RA;
jcf7180002375876_pilon	maker	exon	303498	303708	.	-	.	ID=DT05684-RA:exon:3057;Parent=DT05684-RA;
jcf7180002375876_pilon	maker	exon	303970	304203	.	-	.	ID=DT05684-RA:exon:3056;Parent=DT05684-RA;
jcf7180002375876_pilon	maker	exon	312782	312909	.	-	.	ID=DT05684-RA:exon:3055;Parent=DT05684-RA;
jcf7180002375876_pilon	maker	exon	316552	316762	.	-	.	ID=DT05684-RA:exon:3054;Parent=DT05684-RA;
jcf7180002375876_pilon	maker	exon	317808	318143	.	-	.	ID=DT05684-RA:exon:3053;Parent=DT05684-RA;
jcf7180002375876_pilon	maker	exon	747721	748772	.	-	.	ID=DT05692-RA:exon:3080;Parent=DT05692-RA;
jcf7180002375876_pilon	maker	exon	747721	748603	.	-	.	ID=DT05692-RB:exon:3079;Parent=DT05692-RB;
jcf7180002375876_pilon	maker	exon	748674	748772	.	-	.	ID=DT05692-RB:exon:3078;Parent=DT05692-RB;
jcf7180002375876_pilon	maker	exon	750628	750771	.	-	.	ID=DT05692-RB:exon:3077;Parent=DT05692-RB,DT05692-RA;
jcf7180002375876_pilon	maker	exon	750942	751010	.	-	.	ID=DT05692-RB:exon:3076;Parent=DT05692-RB,DT05692-RA;
jcf7180002375876_pilon	maker	exon	751105	751163	.	-	.	ID=DT05692-RB:exon:3075;Parent=DT05692-RB,DT05692-RA;
jcf7180002375876_pilon	maker	exon	752310	752437	.	-	.	ID=DT05692-RB:exon:3074;Parent=DT05692-RB,DT05692-RA;
jcf7180002375876_pilon	maker	exon	753328	753398	.	-	.	ID=DT05692-RB:exon:3073;Parent=DT05692-RB,DT05692-RA;
jcf7180002375876_pilon	maker	exon	753765	753975	.	-	.	ID=DT05692-RB:exon:3072;Parent=DT05692-RB,DT05692-RA;
jcf7180002375876_pilon	maker	exon	754052	754149	.	-	.	ID=DT05692-RB:exon:3071;Parent=DT05692-RB,DT05692-RA;
jcf7180002375876_pilon	maker	exon	755120	755237	.	-	.	ID=DT05692-RB:exon:3070;Parent=DT05692-RB,DT05692-RA;
jcf7180002375876_pilon	maker	exon	755314	755388	.	-	.	ID=DT05692-RB:exon:3069;Parent=DT05692-RB,DT05692-RA;
jcf7180002375876_pilon	maker	exon	757359	757529	.	-	.	ID=DT05692-RB:exon:3068;Parent=DT05692-RB,DT05692-RA;
jcf7180002375876_pilon	maker	exon	757743	757810	.	-	.	ID=DT05692-RB:exon:3067;Parent=DT05692-RB,DT05692-RA;
jcf7180002375876_pilon	maker	exon	675650	676940	.	-	.	ID=DT05690-RC:exon:3097;Parent=DT05690-RC,DT05690-RA,DT05690-RB;
jcf7180002375876_pilon	maker	exon	678737	678834	.	-	.	ID=DT05690-RC:exon:3096;Parent=DT05690-RC,DT05690-RA,DT05690-RB;
jcf7180002375876_pilon	maker	exon	679951	680067	.	-	.	ID=DT05690-RC:exon:3095;Parent=DT05690-RC,DT05690-RA,DT05690-RB;
jcf7180002375876_pilon	maker	exon	680324	680419	.	-	.	ID=DT05690-RC:exon:3094;Parent=DT05690-RC,DT05690-RA,DT05690-RB;
jcf7180002375876_pilon	maker	exon	680497	680570	.	-	.	ID=DT05690-RC:exon:3093;Parent=DT05690-RC,DT05690-RA,DT05690-RB;
jcf7180002375876_pilon	maker	exon	680662	680767	.	-	.	ID=DT05690-RC:exon:3092;Parent=DT05690-RC,DT05690-RA,DT05690-RB;
jcf7180002375876_pilon	maker	exon	681715	681929	.	-	.	ID=DT05690-RC:exon:3091;Parent=DT05690-RC,DT05690-RA,DT05690-RB;
jcf7180002375876_pilon	maker	exon	684266	684332	.	-	.	ID=DT05690-RC:exon:3090;Parent=DT05690-RC,DT05690-RA,DT05690-RB;
jcf7180002375876_pilon	maker	exon	685683	685760	.	-	.	ID=DT05690-RC:exon:3089;Parent=DT05690-RC;
jcf7180002375876_pilon	maker	exon	690892	691118	.	-	.	ID=DT05690-RC:exon:3088;Parent=DT05690-RC,DT05690-RA,DT05690-RB;
jcf7180002375876_pilon	maker	exon	704103	704300	.	-	.	ID=DT05690-RC:exon:3087;Parent=DT05690-RC,DT05690-RA;
jcf7180002375876_pilon	maker	exon	706845	706937	.	-	.	ID=DT05690-RC:exon:3086;Parent=DT05690-RC,DT05690-RA,DT05690-RB;
jcf7180002375876_pilon	maker	exon	708389	708523	.	-	.	ID=DT05690-RC:exon:3085;Parent=DT05690-RC,DT05690-RA,DT05690-RB;
jcf7180002375876_pilon	maker	exon	709842	710033	.	-	.	ID=DT05690-RC:exon:3084;Parent=DT05690-RC,DT05690-RA,DT05690-RB;
jcf7180002375876_pilon	maker	exon	712574	712709	.	-	.	ID=DT05690-RC:exon:3083;Parent=DT05690-RC,DT05690-RA,DT05690-RB;
jcf7180002375876_pilon	maker	exon	714541	716139	.	-	.	ID=DT05690-RC:exon:3082;Parent=DT05690-RC,DT05690-RA,DT05690-RB;
jcf7180002375876_pilon	maker	exon	724954	725169	.	-	.	ID=DT05690-RC:exon:3081;Parent=DT05690-RC,DT05690-RA,DT05690-RB;
jcf7180002375876_pilon	maker	exon	342034	342037	.	-	.	ID=DT05685-RA:exon:3099;Parent=DT05685-RA;
jcf7180002375876_pilon	maker	exon	340405	340739	.	-	.	ID=DT05685-RA:exon:3098;Parent=DT05685-RA;
jcf7180002375876_pilon	maker	exon	279513	279644	.	-	.	ID=DT05683-RA:exon:3113;Parent=DT05683-RA;
jcf7180002375876_pilon	maker	exon	279320	279432	.	-	.	ID=DT05683-RA:exon:3112;Parent=DT05683-RA;
jcf7180002375876_pilon	maker	exon	278240	278345	.	-	.	ID=DT05683-RA:exon:3111;Parent=DT05683-RA;
jcf7180002375876_pilon	maker	exon	277931	278017	.	-	.	ID=DT05683-RA:exon:3110;Parent=DT05683-RA;
jcf7180002375876_pilon	maker	exon	276969	277099	.	-	.	ID=DT05683-RA:exon:3109;Parent=DT05683-RA;
jcf7180002375876_pilon	maker	exon	276417	276511	.	-	.	ID=DT05683-RA:exon:3108;Parent=DT05683-RA;
jcf7180002375876_pilon	maker	exon	274515	274557	.	-	.	ID=DT05683-RA:exon:3107;Parent=DT05683-RA;
jcf7180002375876_pilon	maker	exon	272259	272307	.	-	.	ID=DT05683-RA:exon:3106;Parent=DT05683-RA;
jcf7180002375876_pilon	maker	exon	268983	269055	.	-	.	ID=DT05683-RA:exon:3105;Parent=DT05683-RA;
jcf7180002375876_pilon	maker	exon	268478	268575	.	-	.	ID=DT05683-RA:exon:3104;Parent=DT05683-RA;
jcf7180002375876_pilon	maker	exon	266421	266532	.	-	.	ID=DT05683-RA:exon:3103;Parent=DT05683-RA;
jcf7180002375876_pilon	maker	exon	266211	266338	.	-	.	ID=DT05683-RA:exon:3102;Parent=DT05683-RA;
jcf7180002375876_pilon	maker	exon	265299	265451	.	-	.	ID=DT05683-RA:exon:3101;Parent=DT05683-RA;
jcf7180002375876_pilon	maker	exon	261733	262074	.	-	.	ID=DT05683-RA:exon:3100;Parent=DT05683-RA;
jcf7180002375876_pilon	maker	exon	758351	759307	.	-	.	ID=DT05693-RA:exon:3123;Parent=DT05693-RA;
jcf7180002375876_pilon	maker	exon	759527	759684	.	-	.	ID=DT05693-RA:exon:3122;Parent=DT05693-RA;
jcf7180002375876_pilon	maker	exon	759986	760094	.	-	.	ID=DT05693-RA:exon:3121;Parent=DT05693-RA;
jcf7180002375876_pilon	maker	exon	761864	762035	.	-	.	ID=DT05693-RA:exon:3120;Parent=DT05693-RA;
jcf7180002375876_pilon	maker	exon	767124	767157	.	-	.	ID=DT05693-RA:exon:3119;Parent=DT05693-RA;
jcf7180002375876_pilon	maker	exon	767250	767265	.	-	.	ID=DT05693-RA:exon:3118;Parent=DT05693-RA;
jcf7180002375876_pilon	maker	exon	767557	767652	.	-	.	ID=DT05693-RA:exon:3117;Parent=DT05693-RA;
jcf7180002375876_pilon	maker	exon	769682	769723	.	-	.	ID=DT05693-RA:exon:3116;Parent=DT05693-RA;
jcf7180002375876_pilon	maker	exon	771326	771397	.	-	.	ID=DT05693-RA:exon:3115;Parent=DT05693-RA;
jcf7180002375876_pilon	maker	exon	771482	771532	.	-	.	ID=DT05693-RA:exon:3114;Parent=DT05693-RA;
jcf7180002375876_pilon	maker	exon	775732	775806	.	-	.	ID=DT05694-RA:exon:3124;Parent=DT05694-RA;
jcf7180002373778_pilon	maker	exon	51635	51762	.	+	.	ID=DT31257-RA:exon:363;Parent=DT31257-RA;
jcf7180002373778_pilon	maker	exon	53810	54515	.	+	.	ID=DT31257-RA:exon:364;Parent=DT31257-RA;
jcf7180002376383_pilon	maker	exon	548854	548856	.	+	.	ID=DT09600-RA:exon:6370;Parent=DT09600-RA;
jcf7180002376383_pilon	maker	exon	551416	552015	.	+	.	ID=DT09600-RA:exon:6371;Parent=DT09600-RA;
jcf7180002376383_pilon	maker	exon	554185	555021	.	+	.	ID=DT09600-RA:exon:6372;Parent=DT09600-RA;
jcf7180002376383_pilon	maker	exon	98895	99444	.	+	.	ID=DT09591-RA:exon:6373;Parent=DT09591-RA;
jcf7180002376383_pilon	maker	exon	100970	101107	.	+	.	ID=DT09591-RA:exon:6374;Parent=DT09591-RA;
jcf7180002376383_pilon	maker	exon	117928	118097	.	+	.	ID=DT09591-RA:exon:6375;Parent=DT09591-RA;
jcf7180002376383_pilon	maker	exon	119006	119070	.	+	.	ID=DT09591-RA:exon:6376;Parent=DT09591-RA;
jcf7180002376383_pilon	maker	exon	121558	121716	.	+	.	ID=DT09591-RA:exon:6377;Parent=DT09591-RA;
jcf7180002376383_pilon	maker	exon	125986	126119	.	+	.	ID=DT09591-RA:exon:6378;Parent=DT09591-RA;
jcf7180002376383_pilon	maker	exon	139888	140063	.	+	.	ID=DT09591-RA:exon:6379;Parent=DT09591-RA;
jcf7180002376383_pilon	maker	exon	143427	143541	.	+	.	ID=DT09591-RA:exon:6380;Parent=DT09591-RA;
jcf7180002376383_pilon	maker	exon	159136	159306	.	+	.	ID=DT09591-RA:exon:6381;Parent=DT09591-RA;
jcf7180002376383_pilon	maker	exon	162192	162321	.	+	.	ID=DT09591-RA:exon:6382;Parent=DT09591-RA;
jcf7180002376383_pilon	maker	exon	169247	169302	.	+	.	ID=DT09591-RA:exon:6383;Parent=DT09591-RA;
jcf7180002376383_pilon	maker	exon	170115	170250	.	+	.	ID=DT09591-RA:exon:6384;Parent=DT09591-RA;
jcf7180002376383_pilon	maker	exon	171728	171862	.	+	.	ID=DT09591-RA:exon:6385;Parent=DT09591-RA;
jcf7180002376383_pilon	maker	exon	175356	175504	.	+	.	ID=DT09591-RA:exon:6386;Parent=DT09591-RA;
jcf7180002376383_pilon	maker	exon	177219	177410	.	+	.	ID=DT09591-RA:exon:6387;Parent=DT09591-RA;
jcf7180002376383_pilon	maker	exon	179719	179894	.	+	.	ID=DT09591-RA:exon:6388;Parent=DT09591-RA;
jcf7180002376383_pilon	maker	exon	182499	182659	.	+	.	ID=DT09591-RA:exon:6389;Parent=DT09591-RA;
jcf7180002376383_pilon	maker	exon	184811	184991	.	+	.	ID=DT09591-RA:exon:6390;Parent=DT09591-RA;
jcf7180002376383_pilon	maker	exon	192660	192767	.	+	.	ID=DT09591-RA:exon:6391;Parent=DT09591-RA;
jcf7180002376383_pilon	maker	exon	194354	194550	.	+	.	ID=DT09591-RA:exon:6392;Parent=DT09591-RA;
jcf7180002376383_pilon	maker	exon	196167	196393	.	+	.	ID=DT09591-RA:exon:6393;Parent=DT09591-RA;
jcf7180002376383_pilon	maker	exon	203040	203229	.	+	.	ID=DT09591-RA:exon:6394;Parent=DT09591-RA;
jcf7180002376383_pilon	maker	exon	205124	205207	.	+	.	ID=DT09591-RA:exon:6395;Parent=DT09591-RA;
jcf7180002376383_pilon	maker	exon	208242	208401	.	+	.	ID=DT09591-RA:exon:6396;Parent=DT09591-RA;
jcf7180002376383_pilon	maker	exon	208487	208551	.	+	.	ID=DT09591-RA:exon:6397;Parent=DT09591-RA;
jcf7180002376383_pilon	maker	exon	212593	212654	.	+	.	ID=DT09591-RA:exon:6398;Parent=DT09591-RA;
jcf7180002376383_pilon	maker	exon	212732	212903	.	+	.	ID=DT09591-RA:exon:6399;Parent=DT09591-RA;
jcf7180002376383_pilon	maker	exon	212989	213012	.	+	.	ID=DT09591-RA:exon:6400;Parent=DT09591-RA;
jcf7180002376383_pilon	maker	exon	214881	215060	.	+	.	ID=DT09591-RA:exon:6401;Parent=DT09591-RA;
jcf7180002376383_pilon	maker	exon	216833	216976	.	+	.	ID=DT09591-RA:exon:6402;Parent=DT09591-RA;
jcf7180002376383_pilon	maker	exon	220285	221807	.	+	.	ID=DT09591-RA:exon:6403;Parent=DT09591-RA;
jcf7180002376383_pilon	maker	exon	221838	221871	.	+	.	ID=DT09591-RA:exon:6404;Parent=DT09591-RA;
jcf7180002376383_pilon	maker	exon	59146	59270	.	+	.	ID=DT09587-RA:exon:6405;Parent=DT09587-RA;
jcf7180002376383_pilon	maker	exon	59495	59629	.	+	.	ID=DT09587-RA:exon:6406;Parent=DT09587-RA;
jcf7180002376383_pilon	maker	exon	60428	60566	.	+	.	ID=DT09587-RA:exon:6407;Parent=DT09587-RA;
jcf7180002376383_pilon	maker	exon	60639	60701	.	+	.	ID=DT09587-RA:exon:6408;Parent=DT09587-RA;
jcf7180002376383_pilon	maker	exon	62358	62434	.	+	.	ID=DT09587-RA:exon:6409;Parent=DT09587-RA;
jcf7180002376383_pilon	maker	exon	62511	62691	.	+	.	ID=DT09587-RA:exon:6410;Parent=DT09587-RA;
jcf7180002376383_pilon	maker	exon	62842	62997	.	+	.	ID=DT09587-RA:exon:6411;Parent=DT09587-RA;
jcf7180002376383_pilon	maker	exon	64681	64875	.	+	.	ID=DT09587-RA:exon:6412;Parent=DT09587-RA;
jcf7180002376383_pilon	maker	exon	65686	65874	.	+	.	ID=DT09587-RA:exon:6413;Parent=DT09587-RA;
jcf7180002376383_pilon	maker	exon	67653	67820	.	+	.	ID=DT09587-RA:exon:6414;Parent=DT09587-RA;
jcf7180002376383_pilon	maker	exon	72626	72802	.	+	.	ID=DT09587-RA:exon:6415;Parent=DT09587-RA;
jcf7180002376383_pilon	maker	exon	75448	75642	.	+	.	ID=DT09587-RA:exon:6416;Parent=DT09587-RA;
jcf7180002376383_pilon	maker	exon	75737	75821	.	+	.	ID=DT09587-RA:exon:6417;Parent=DT09587-RA;
jcf7180002376383_pilon	maker	exon	77075	77141	.	+	.	ID=DT09587-RA:exon:6418;Parent=DT09587-RA;
jcf7180002376383_pilon	maker	exon	77694	77802	.	+	.	ID=DT09587-RA:exon:6419;Parent=DT09587-RA;
jcf7180002376383_pilon	maker	exon	77902	78040	.	+	.	ID=DT09587-RA:exon:6420;Parent=DT09587-RA;
jcf7180002376383_pilon	maker	exon	79625	79686	.	+	.	ID=DT09587-RA:exon:6421;Parent=DT09587-RA;
jcf7180002376383_pilon	maker	exon	81708	81798	.	+	.	ID=DT09587-RA:exon:6422;Parent=DT09587-RA;
jcf7180002376383_pilon	maker	exon	82002	83738	.	+	.	ID=DT09587-RA:exon:6423;Parent=DT09587-RA;
jcf7180002376383_pilon	maker	exon	87793	87871	.	+	.	ID=DT09589-RA:exon:6424;Parent=DT09589-RA;
jcf7180002376383_pilon	maker	exon	88822	88873	.	+	.	ID=DT09589-RA:exon:6425;Parent=DT09589-RA;
jcf7180002376383_pilon	maker	exon	89028	89403	.	+	.	ID=DT09589-RA:exon:6426;Parent=DT09589-RA;
jcf7180002376383_pilon	maker	exon	91598	92782	.	+	.	ID=DT09589-RA:exon:6427;Parent=DT09589-RA,DT09589-RB;
jcf7180002376383_pilon	maker	exon	87840	87871	.	+	.	ID=DT09589-RB:exon:6428;Parent=DT09589-RB;
jcf7180002376383_pilon	maker	exon	88822	88893	.	+	.	ID=DT09589-RB:exon:6429;Parent=DT09589-RB;
jcf7180002376383_pilon	maker	exon	89050	89403	.	+	.	ID=DT09589-RB:exon:6430;Parent=DT09589-RB;
jcf7180002376383_pilon	maker	exon	497584	497635	.	+	.	ID=DT09598-RA:exon:6431;Parent=DT09598-RA;
jcf7180002376383_pilon	maker	exon	497747	497835	.	+	.	ID=DT09598-RA:exon:6432;Parent=DT09598-RA;
jcf7180002376383_pilon	maker	exon	498923	499020	.	+	.	ID=DT09598-RA:exon:6433;Parent=DT09598-RA;
jcf7180002376383_pilon	maker	exon	499104	499226	.	+	.	ID=DT09598-RA:exon:6434;Parent=DT09598-RA;
jcf7180002376383_pilon	maker	exon	499298	499434	.	+	.	ID=DT09598-RA:exon:6435;Parent=DT09598-RA;
jcf7180002376383_pilon	maker	exon	499514	499659	.	+	.	ID=DT09598-RA:exon:6436;Parent=DT09598-RA;
jcf7180002376383_pilon	maker	exon	500216	500368	.	+	.	ID=DT09598-RA:exon:6437;Parent=DT09598-RA;
jcf7180002376383_pilon	maker	exon	500452	500540	.	+	.	ID=DT09598-RA:exon:6438;Parent=DT09598-RA;
jcf7180002376383_pilon	maker	exon	84857	86095	.	-	.	ID=DT09588-RA:exon:6439;Parent=DT09588-RA;
jcf7180002376383_pilon	maker	exon	464804	467185	.	-	.	ID=DT09595-RA:exon:6443;Parent=DT09595-RA;
jcf7180002376383_pilon	maker	exon	468649	468793	.	-	.	ID=DT09595-RA:exon:6442;Parent=DT09595-RA;
jcf7180002376383_pilon	maker	exon	471342	471567	.	-	.	ID=DT09595-RA:exon:6441;Parent=DT09595-RA;
jcf7180002376383_pilon	maker	exon	472556	472711	.	-	.	ID=DT09595-RA:exon:6440;Parent=DT09595-RA;
jcf7180002376383_pilon	maker	exon	494363	494869	.	-	.	ID=DT09597-RA:exon:6451;Parent=DT09597-RA;
jcf7180002376383_pilon	maker	exon	494953	495105	.	-	.	ID=DT09597-RA:exon:6450;Parent=DT09597-RA;
jcf7180002376383_pilon	maker	exon	495189	495334	.	-	.	ID=DT09597-RA:exon:6449;Parent=DT09597-RA;
jcf7180002376383_pilon	maker	exon	495402	495538	.	-	.	ID=DT09597-RA:exon:6448;Parent=DT09597-RA;
jcf7180002376383_pilon	maker	exon	495614	495736	.	-	.	ID=DT09597-RA:exon:6447;Parent=DT09597-RA;
jcf7180002376383_pilon	maker	exon	495825	495922	.	-	.	ID=DT09597-RA:exon:6446;Parent=DT09597-RA;
jcf7180002376383_pilon	maker	exon	496161	496249	.	-	.	ID=DT09597-RA:exon:6445;Parent=DT09597-RA;
jcf7180002376383_pilon	maker	exon	496350	496677	.	-	.	ID=DT09597-RA:exon:6444;Parent=DT09597-RA;
jcf7180002376383_pilon	maker	exon	348955	352705	.	-	.	ID=DT09593-RA:exon:6457;Parent=DT09593-RA;
jcf7180002376383_pilon	maker	exon	352973	353095	.	-	.	ID=DT09593-RA:exon:6456;Parent=DT09593-RA;
jcf7180002376383_pilon	maker	exon	354790	355032	.	-	.	ID=DT09593-RA:exon:6455;Parent=DT09593-RA;
jcf7180002376383_pilon	maker	exon	355561	355648	.	-	.	ID=DT09593-RA:exon:6454;Parent=DT09593-RA;
jcf7180002376383_pilon	maker	exon	356883	356911	.	-	.	ID=DT09593-RA:exon:6453;Parent=DT09593-RA;
jcf7180002376383_pilon	maker	exon	357731	357777	.	-	.	ID=DT09593-RA:exon:6452;Parent=DT09593-RA;
jcf7180002376383_pilon	maker	exon	589603	589665	.	-	.	ID=DT09602-RB:exon:6531;Parent=DT09602-RB;
jcf7180002376383_pilon	maker	exon	589932	590009	.	-	.	ID=DT09602-RH:exon:6530;Parent=DT09602-RH;
jcf7180002376383_pilon	maker	exon	592205	592275	.	-	.	ID=DT09602-RC:exon:6529;Parent=DT09602-RC;
jcf7180002376383_pilon	maker	exon	584880	585031	.	-	.	ID=DT09602-RC:exon:6528;Parent=DT09602-RC;
jcf7180002376383_pilon	maker	exon	583868	583946	.	-	.	ID=DT09602-RC:exon:6527;Parent=DT09602-RC;
jcf7180002376383_pilon	maker	exon	578854	580533	.	-	.	ID=DT09602-RA:exon:6526;Parent=DT09602-RA;
jcf7180002376383_pilon	maker	exon	584912	585031	.	-	.	ID=DT09602-RA:exon:6525;Parent=DT09602-RA;
jcf7180002376383_pilon	maker	exon	585325	585432	.	-	.	ID=DT09602-RA:exon:6524;Parent=DT09602-RA;
jcf7180002376383_pilon	maker	exon	587917	587973	.	-	.	ID=DT09602-RA:exon:6523;Parent=DT09602-RA;
jcf7180002376383_pilon	maker	exon	588058	588111	.	-	.	ID=DT09602-RA:exon:6522;Parent=DT09602-RA;
jcf7180002376383_pilon	maker	exon	588704	588749	.	-	.	ID=DT09602-RA:exon:6521;Parent=DT09602-RA;
jcf7180002376383_pilon	maker	exon	588999	589052	.	-	.	ID=DT09602-RA:exon:6520;Parent=DT09602-RA;
jcf7180002376383_pilon	maker	exon	591264	591362	.	-	.	ID=DT09602-RA:exon:6519;Parent=DT09602-RA;
jcf7180002376383_pilon	maker	exon	592332	592389	.	-	.	ID=DT09602-RA:exon:6518;Parent=DT09602-RA;
jcf7180002376383_pilon	maker	exon	584924	585063	.	-	.	ID=DT09602-RF:exon:6517;Parent=DT09602-RF;
jcf7180002376383_pilon	maker	exon	584030	584075	.	-	.	ID=DT09602-RF:exon:6516;Parent=DT09602-RF;
jcf7180002376383_pilon	maker	exon	589937	590009	.	-	.	ID=DT09602-RE:exon:6515;Parent=DT09602-RE,DT09602-RF;
jcf7180002376383_pilon	maker	exon	588829	588917	.	-	.	ID=DT09602-RE:exon:6514;Parent=DT09602-RE,DT09602-RF;
jcf7180002376383_pilon	maker	exon	584768	584863	.	-	.	ID=DT09602-RD:exon:6513;Parent=DT09602-RD;
jcf7180002376383_pilon	maker	exon	597012	597024	.	-	.	ID=DT09602-RG:exon:6512;Parent=DT09602-RG,DT09602-RD,DT09602-RE,DT09602-RF,DT09602-RA,DT09602-RH;
jcf7180002376383_pilon	maker	exon	596916	596932	.	-	.	ID=DT09602-RG:exon:6511;Parent=DT09602-RG,DT09602-RD,DT09602-RE,DT09602-RF,DT09602-RA,DT09602-RH;
jcf7180002376383_pilon	maker	exon	596813	596845	.	-	.	ID=DT09602-RG:exon:6510;Parent=DT09602-RG,DT09602-RD,DT09602-RE,DT09602-RF,DT09602-RA,DT09602-RH;
jcf7180002376383_pilon	maker	exon	596696	596728	.	-	.	ID=DT09602-RG:exon:6509;Parent=DT09602-RG,DT09602-RD,DT09602-RE,DT09602-RF,DT09602-RA,DT09602-RH;
jcf7180002376383_pilon	maker	exon	596479	596532	.	-	.	ID=DT09602-RG:exon:6508;Parent=DT09602-RG,DT09602-RD,DT09602-RE,DT09602-RF,DT09602-RA,DT09602-RH;
jcf7180002376383_pilon	maker	exon	596189	596290	.	-	.	ID=DT09602-RG:exon:6507;Parent=DT09602-RG,DT09602-RD,DT09602-RE,DT09602-RF,DT09602-RA,DT09602-RH;
jcf7180002376383_pilon	maker	exon	596029	596106	.	-	.	ID=DT09602-RG:exon:6506;Parent=DT09602-RG,DT09602-RD,DT09602-RE,DT09602-RF,DT09602-RA,DT09602-RH;
jcf7180002376383_pilon	maker	exon	595247	595299	.	-	.	ID=DT09602-RG:exon:6505;Parent=DT09602-RG,DT09602-RD,DT09602-RE,DT09602-RF,DT09602-RA,DT09602-RH;
jcf7180002376383_pilon	maker	exon	594909	594953	.	-	.	ID=DT09602-RG:exon:6504;Parent=DT09602-RG,DT09602-RD,DT09602-RE,DT09602-RF,DT09602-RA,DT09602-RH;
jcf7180002376383_pilon	maker	exon	594769	594822	.	-	.	ID=DT09602-RG:exon:6503;Parent=DT09602-RG,DT09602-RD,DT09602-RE,DT09602-RF,DT09602-RA,DT09602-RH;
jcf7180002376383_pilon	maker	exon	594547	594600	.	-	.	ID=DT09602-RG:exon:6502;Parent=DT09602-RG,DT09602-RD,DT09602-RE,DT09602-RF,DT09602-RA,DT09602-RH;
jcf7180002376383_pilon	maker	exon	594424	594477	.	-	.	ID=DT09602-RG:exon:6501;Parent=DT09602-RG,DT09602-RD,DT09602-RE,DT09602-RF,DT09602-RA,DT09602-RH;
jcf7180002376383_pilon	maker	exon	594298	594351	.	-	.	ID=DT09602-RG:exon:6500;Parent=DT09602-RG,DT09602-RD,DT09602-RE,DT09602-RF,DT09602-RA,DT09602-RH;
jcf7180002376383_pilon	maker	exon	594166	594219	.	-	.	ID=DT09602-RG:exon:6499;Parent=DT09602-RG,DT09602-RD,DT09602-RE,DT09602-RF,DT09602-RA,DT09602-RH;
jcf7180002376383_pilon	maker	exon	592474	592518	.	-	.	ID=DT09602-RG:exon:6498;Parent=DT09602-RG,DT09602-RD,DT09602-RE,DT09602-RF,DT09602-RA,DT09602-RH;
jcf7180002376383_pilon	maker	exon	592336	592389	.	-	.	ID=DT09602-RG:exon:6497;Parent=DT09602-RG,DT09602-RD,DT09602-RE,DT09602-RF,DT09602-RH;
jcf7180002376383_pilon	maker	exon	592205	592249	.	-	.	ID=DT09602-RG:exon:6496;Parent=DT09602-RG,DT09602-RD,DT09602-RE,DT09602-RF,DT09602-RA,DT09602-RH;
jcf7180002376383_pilon	maker	exon	591774	591827	.	-	.	ID=DT09602-RG:exon:6495;Parent=DT09602-RG,DT09602-RD,DT09602-RE,DT09602-RF,DT09602-RA,DT09602-RC,DT09602-RH;
jcf7180002376383_pilon	maker	exon	591591	591689	.	-	.	ID=DT09602-RG:exon:6494;Parent=DT09602-RG,DT09602-RD,DT09602-RE,DT09602-RF,DT09602-RA,DT09602-RC,DT09602-RH;
jcf7180002376383_pilon	maker	exon	591463	591507	.	-	.	ID=DT09602-RG:exon:6493;Parent=DT09602-RG,DT09602-RD,DT09602-RE,DT09602-RF,DT09602-RA,DT09602-RC,DT09602-RH;
jcf7180002376383_pilon	maker	exon	591260	591362	.	-	.	ID=DT09602-RG:exon:6492;Parent=DT09602-RG,DT09602-RD,DT09602-RE,DT09602-RF,DT09602-RC,DT09602-RH;
jcf7180002376383_pilon	maker	exon	591127	591180	.	-	.	ID=DT09602-RG:exon:6491;Parent=DT09602-RG,DT09602-RD,DT09602-RE,DT09602-RF,DT09602-RA,DT09602-RC,DT09602-RH;
jcf7180002376383_pilon	maker	exon	590940	591047	.	-	.	ID=DT09602-RG:exon:6490;Parent=DT09602-RG,DT09602-RD,DT09602-RE,DT09602-RF,DT09602-RA,DT09602-RC,DT09602-RH;
jcf7180002376383_pilon	maker	exon	590803	590856	.	-	.	ID=DT09602-RG:exon:6489;Parent=DT09602-RG,DT09602-RD,DT09602-RE,DT09602-RF,DT09602-RA,DT09602-RC,DT09602-RH;
jcf7180002376383_pilon	maker	exon	590633	590731	.	-	.	ID=DT09602-RG:exon:6488;Parent=DT09602-RG,DT09602-RD,DT09602-RE,DT09602-RF,DT09602-RA,DT09602-RC,DT09602-RH;
jcf7180002376383_pilon	maker	exon	590501	590554	.	-	.	ID=DT09602-RG:exon:6487;Parent=DT09602-RG,DT09602-RD,DT09602-RE,DT09602-RF,DT09602-RA,DT09602-RC,DT09602-RH;
jcf7180002376383_pilon	maker	exon	590327	590425	.	-	.	ID=DT09602-RG:exon:6486;Parent=DT09602-RG,DT09602-RD,DT09602-RE,DT09602-RF,DT09602-RA,DT09602-RC,DT09602-RH;
jcf7180002376383_pilon	maker	exon	590193	590246	.	-	.	ID=DT09602-RG:exon:6485;Parent=DT09602-RG,DT09602-RD,DT09602-RE,DT09602-RF,DT09602-RA,DT09602-RC,DT09602-RH;
jcf7180002376383_pilon	maker	exon	589956	590009	.	-	.	ID=DT09602-RG:exon:6484;Parent=DT09602-RG,DT09602-RD,DT09602-RA,DT09602-RC;
jcf7180002376383_pilon	maker	exon	588829	588882	.	-	.	ID=DT09602-RG:exon:6483;Parent=DT09602-RG,DT09602-RD,DT09602-RA,DT09602-RC,DT09602-RB;
jcf7180002376383_pilon	maker	exon	588704	588748	.	-	.	ID=DT09602-RG:exon:6482;Parent=DT09602-RG,DT09602-RD,DT09602-RE,DT09602-RF,DT09602-RC,DT09602-RB;
jcf7180002376383_pilon	maker	exon	588514	588612	.	-	.	ID=DT09602-RG:exon:6481;Parent=DT09602-RG,DT09602-RD,DT09602-RE,DT09602-RF,DT09602-RA,DT09602-RC,DT09602-RB;
jcf7180002376383_pilon	maker	exon	588324	588431	.	-	.	ID=DT09602-RG:exon:6480;Parent=DT09602-RG,DT09602-RD,DT09602-RE,DT09602-RF,DT09602-RA,DT09602-RC,DT09602-RB;
jcf7180002376383_pilon	maker	exon	588184	588237	.	-	.	ID=DT09602-RG:exon:6479;Parent=DT09602-RG,DT09602-RD,DT09602-RE,DT09602-RF,DT09602-RA,DT09602-RC,DT09602-RB;
jcf7180002376383_pilon	maker	exon	588050	588111	.	-	.	ID=DT09602-RG:exon:6478;Parent=DT09602-RG,DT09602-RD,DT09602-RE,DT09602-RF,DT09602-RC,DT09602-RB;
jcf7180002376383_pilon	maker	exon	587918	587971	.	-	.	ID=DT09602-RG:exon:6477;Parent=DT09602-RG,DT09602-RD,DT09602-RE,DT09602-RF,DT09602-RC,DT09602-RB;
jcf7180002376383_pilon	maker	exon	587781	587834	.	-	.	ID=DT09602-RG:exon:6476;Parent=DT09602-RG,DT09602-RD,DT09602-RE,DT09602-RF,DT09602-RA,DT09602-RC,DT09602-RB;
jcf7180002376383_pilon	maker	exon	586660	586767	.	-	.	ID=DT09602-RG:exon:6475;Parent=DT09602-RG,DT09602-RD,DT09602-RE,DT09602-RF,DT09602-RA,DT09602-RC,DT09602-RB;
jcf7180002376383_pilon	maker	exon	586520	586573	.	-	.	ID=DT09602-RG:exon:6474;Parent=DT09602-RG,DT09602-RD,DT09602-RE,DT09602-RF,DT09602-RA,DT09602-RC,DT09602-RB;
jcf7180002376383_pilon	maker	exon	586385	586438	.	-	.	ID=DT09602-RG:exon:6473;Parent=DT09602-RG,DT09602-RD,DT09602-RE,DT09602-RF,DT09602-RA,DT09602-RC,DT09602-RB;
jcf7180002376383_pilon	maker	exon	586008	586169	.	-	.	ID=DT09602-RG:exon:6472;Parent=DT09602-RG,DT09602-RD,DT09602-RE,DT09602-RF,DT09602-RA,DT09602-RC,DT09602-RB;
jcf7180002376383_pilon	maker	exon	585816	585923	.	-	.	ID=DT09602-RG:exon:6471;Parent=DT09602-RG,DT09602-RD,DT09602-RE,DT09602-RF,DT09602-RA,DT09602-RC,DT09602-RB;
jcf7180002376383_pilon	maker	exon	585670	585709	.	-	.	ID=DT09602-RG:exon:6470;Parent=DT09602-RG,DT09602-RD,DT09602-RE,DT09602-RF,DT09602-RC,DT09602-RB;
jcf7180002376383_pilon	maker	exon	585325	585414	.	-	.	ID=DT09602-RG:exon:6469;Parent=DT09602-RG,DT09602-RD,DT09602-RE,DT09602-RF,DT09602-RC,DT09602-RB;
jcf7180002376383_pilon	maker	exon	585181	585234	.	-	.	ID=DT09602-RG:exon:6468;Parent=DT09602-RG,DT09602-RD,DT09602-RE,DT09602-RF,DT09602-RA,DT09602-RC,DT09602-RB;
jcf7180002376383_pilon	maker	exon	584924	585031	.	-	.	ID=DT09602-RG:exon:6467;Parent=DT09602-RG,DT09602-RD,DT09602-RE,DT09602-RB;
jcf7180002376383_pilon	maker	exon	584768	584821	.	-	.	ID=DT09602-RG:exon:6466;Parent=DT09602-RG,DT09602-RE,DT09602-RF,DT09602-RA,DT09602-RC,DT09602-RB;
jcf7180002376383_pilon	maker	exon	584161	584268	.	-	.	ID=DT09602-RG:exon:6465;Parent=DT09602-RG,DT09602-RD,DT09602-RE,DT09602-RF,DT09602-RA,DT09602-RC,DT09602-RB;
jcf7180002376383_pilon	maker	exon	584022	584075	.	-	.	ID=DT09602-RG:exon:6464;Parent=DT09602-RG,DT09602-RD,DT09602-RE,DT09602-RA,DT09602-RC,DT09602-RB;
jcf7180002376383_pilon	maker	exon	583839	583946	.	-	.	ID=DT09602-RG:exon:6463;Parent=DT09602-RG,DT09602-RD,DT09602-RE,DT09602-RF,DT09602-RA,DT09602-RB;
jcf7180002376383_pilon	maker	exon	583463	583751	.	-	.	ID=DT09602-RG:exon:6462;Parent=DT09602-RG,DT09602-RD,DT09602-RE,DT09602-RF,DT09602-RA,DT09602-RC,DT09602-RB;
jcf7180002376383_pilon	maker	exon	581993	582180	.	-	.	ID=DT09602-RG:exon:6461;Parent=DT09602-RG,DT09602-RD,DT09602-RE,DT09602-RF,DT09602-RA,DT09602-RC,DT09602-RB;
jcf7180002376383_pilon	maker	exon	581492	581734	.	-	.	ID=DT09602-RG:exon:6460;Parent=DT09602-RG,DT09602-RD,DT09602-RE,DT09602-RF,DT09602-RA,DT09602-RC,DT09602-RB;
jcf7180002376383_pilon	maker	exon	580407	580509	.	-	.	ID=DT09602-RG:exon:6459;Parent=DT09602-RG,DT09602-RD,DT09602-RE,DT09602-RF,DT09602-RC,DT09602-RB;
jcf7180002376383_pilon	maker	exon	579881	580029	.	-	.	ID=DT09602-RG:exon:6458;Parent=DT09602-RG,DT09602-RD,DT09602-RE,DT09602-RF,DT09602-RC,DT09602-RB;
jcf7180002376383_pilon	maker	exon	478808	479050	.	-	.	ID=DT09596-RA:exon:6557;Parent=DT09596-RA;
jcf7180002376383_pilon	maker	exon	479648	479722	.	-	.	ID=DT09596-RA:exon:6556;Parent=DT09596-RA;
jcf7180002376383_pilon	maker	exon	480621	480768	.	-	.	ID=DT09596-RA:exon:6555;Parent=DT09596-RA;
jcf7180002376383_pilon	maker	exon	481328	481554	.	-	.	ID=DT09596-RA:exon:6554;Parent=DT09596-RA;
jcf7180002376383_pilon	maker	exon	481624	481719	.	-	.	ID=DT09596-RA:exon:6553;Parent=DT09596-RA;
jcf7180002376383_pilon	maker	exon	481988	482085	.	-	.	ID=DT09596-RA:exon:6552;Parent=DT09596-RA;
jcf7180002376383_pilon	maker	exon	482186	482336	.	-	.	ID=DT09596-RA:exon:6551;Parent=DT09596-RA;
jcf7180002376383_pilon	maker	exon	483692	483788	.	-	.	ID=DT09596-RA:exon:6550;Parent=DT09596-RA;
jcf7180002376383_pilon	maker	exon	483873	484032	.	-	.	ID=DT09596-RA:exon:6549;Parent=DT09596-RA;
jcf7180002376383_pilon	maker	exon	484098	484204	.	-	.	ID=DT09596-RA:exon:6548;Parent=DT09596-RA;
jcf7180002376383_pilon	maker	exon	484308	484386	.	-	.	ID=DT09596-RA:exon:6547;Parent=DT09596-RA;
jcf7180002376383_pilon	maker	exon	485246	485564	.	-	.	ID=DT09596-RA:exon:6546;Parent=DT09596-RA;
jcf7180002376383_pilon	maker	exon	486099	486149	.	-	.	ID=DT09596-RA:exon:6545;Parent=DT09596-RA;
jcf7180002376383_pilon	maker	exon	486672	486742	.	-	.	ID=DT09596-RA:exon:6544;Parent=DT09596-RA;
jcf7180002376383_pilon	maker	exon	487271	487466	.	-	.	ID=DT09596-RA:exon:6543;Parent=DT09596-RA;
jcf7180002376383_pilon	maker	exon	487542	487691	.	-	.	ID=DT09596-RA:exon:6542;Parent=DT09596-RA;
jcf7180002376383_pilon	maker	exon	487810	487875	.	-	.	ID=DT09596-RA:exon:6541;Parent=DT09596-RA;
jcf7180002376383_pilon	maker	exon	487950	488057	.	-	.	ID=DT09596-RA:exon:6540;Parent=DT09596-RA;
jcf7180002376383_pilon	maker	exon	488118	488165	.	-	.	ID=DT09596-RA:exon:6539;Parent=DT09596-RA;
jcf7180002376383_pilon	maker	exon	488249	488316	.	-	.	ID=DT09596-RA:exon:6538;Parent=DT09596-RA;
jcf7180002376383_pilon	maker	exon	489243	489366	.	-	.	ID=DT09596-RA:exon:6537;Parent=DT09596-RA;
jcf7180002376383_pilon	maker	exon	490473	490688	.	-	.	ID=DT09596-RA:exon:6536;Parent=DT09596-RA;
jcf7180002376383_pilon	maker	exon	491129	491223	.	-	.	ID=DT09596-RA:exon:6535;Parent=DT09596-RA;
jcf7180002376383_pilon	maker	exon	492259	492358	.	-	.	ID=DT09596-RA:exon:6534;Parent=DT09596-RA;
jcf7180002376383_pilon	maker	exon	492458	492664	.	-	.	ID=DT09596-RA:exon:6533;Parent=DT09596-RA;
jcf7180002376383_pilon	maker	exon	492766	492867	.	-	.	ID=DT09596-RA:exon:6532;Parent=DT09596-RA;
jcf7180002376383_pilon	maker	exon	36308	36359	.	-	.	ID=DT09584-RA:exon:6565;Parent=DT09584-RA;
jcf7180002376383_pilon	maker	exon	39081	39191	.	-	.	ID=DT09584-RA:exon:6564;Parent=DT09584-RA;
jcf7180002376383_pilon	maker	exon	39264	39351	.	-	.	ID=DT09584-RA:exon:6563;Parent=DT09584-RA;
jcf7180002376383_pilon	maker	exon	39515	39670	.	-	.	ID=DT09584-RA:exon:6562;Parent=DT09584-RA;
jcf7180002376383_pilon	maker	exon	39742	39867	.	-	.	ID=DT09584-RA:exon:6561;Parent=DT09584-RA;
jcf7180002376383_pilon	maker	exon	41790	42160	.	-	.	ID=DT09584-RA:exon:6560;Parent=DT09584-RA;
jcf7180002376383_pilon	maker	exon	43342	43465	.	-	.	ID=DT09584-RA:exon:6559;Parent=DT09584-RA;
jcf7180002376383_pilon	maker	exon	43486	43789	.	-	.	ID=DT09584-RA:exon:6558;Parent=DT09584-RA;
jcf7180002376383_pilon	maker	exon	513725	514002	.	-	.	ID=DT09599-RB:exon:6639;Parent=DT09599-RB;
jcf7180002376383_pilon	maker	exon	530301	530445	.	-	.	ID=DT09599-RC:exon:6638;Parent=DT09599-RC;
jcf7180002376383_pilon	maker	exon	526861	526982	.	-	.	ID=DT09599-RC:exon:6637;Parent=DT09599-RC,DT09599-RA;
jcf7180002376383_pilon	maker	exon	526567	526732	.	-	.	ID=DT09599-RC:exon:6636;Parent=DT09599-RC,DT09599-RA;
jcf7180002376383_pilon	maker	exon	547229	547360	.	-	.	ID=DT09599-RD:exon:6635;Parent=DT09599-RD,DT09599-RC,DT09599-RA,DT09599-RB;
jcf7180002376383_pilon	maker	exon	547054	547145	.	-	.	ID=DT09599-RD:exon:6634;Parent=DT09599-RD,DT09599-RC,DT09599-RA,DT09599-RB;
jcf7180002376383_pilon	maker	exon	545538	545608	.	-	.	ID=DT09599-RD:exon:6633;Parent=DT09599-RD,DT09599-RC,DT09599-RA,DT09599-RB;
jcf7180002376383_pilon	maker	exon	543815	543936	.	-	.	ID=DT09599-RD:exon:6632;Parent=DT09599-RD,DT09599-RC,DT09599-RA,DT09599-RB;
jcf7180002376383_pilon	maker	exon	543646	543732	.	-	.	ID=DT09599-RD:exon:6631;Parent=DT09599-RD,DT09599-RC,DT09599-RA,DT09599-RB;
jcf7180002376383_pilon	maker	exon	542184	542342	.	-	.	ID=DT09599-RD:exon:6630;Parent=DT09599-RD,DT09599-RC,DT09599-RA,DT09599-RB;
jcf7180002376383_pilon	maker	exon	540796	540894	.	-	.	ID=DT09599-RD:exon:6629;Parent=DT09599-RD,DT09599-RC,DT09599-RA,DT09599-RB;
jcf7180002376383_pilon	maker	exon	540537	540620	.	-	.	ID=DT09599-RD:exon:6628;Parent=DT09599-RD,DT09599-RC,DT09599-RA,DT09599-RB;
jcf7180002376383_pilon	maker	exon	540315	540461	.	-	.	ID=DT09599-RD:exon:6627;Parent=DT09599-RD,DT09599-RC,DT09599-RA,DT09599-RB;
jcf7180002376383_pilon	maker	exon	539638	539733	.	-	.	ID=DT09599-RD:exon:6626;Parent=DT09599-RD,DT09599-RC,DT09599-RA,DT09599-RB;
jcf7180002376383_pilon	maker	exon	539530	539568	.	-	.	ID=DT09599-RD:exon:6625;Parent=DT09599-RD,DT09599-RC,DT09599-RA,DT09599-RB;
jcf7180002376383_pilon	maker	exon	539310	539449	.	-	.	ID=DT09599-RD:exon:6624;Parent=DT09599-RD,DT09599-RC,DT09599-RA,DT09599-RB;
jcf7180002376383_pilon	maker	exon	539125	539224	.	-	.	ID=DT09599-RD:exon:6623;Parent=DT09599-RD,DT09599-RC,DT09599-RA,DT09599-RB;
jcf7180002376383_pilon	maker	exon	537966	538126	.	-	.	ID=DT09599-RD:exon:6622;Parent=DT09599-RD,DT09599-RC,DT09599-RA,DT09599-RB;
jcf7180002376383_pilon	maker	exon	537759	537900	.	-	.	ID=DT09599-RD:exon:6621;Parent=DT09599-RD,DT09599-RC,DT09599-RA,DT09599-RB;
jcf7180002376383_pilon	maker	exon	537528	537689	.	-	.	ID=DT09599-RD:exon:6620;Parent=DT09599-RD,DT09599-RC,DT09599-RA,DT09599-RB;
jcf7180002376383_pilon	maker	exon	537289	537433	.	-	.	ID=DT09599-RD:exon:6619;Parent=DT09599-RD,DT09599-RC,DT09599-RA,DT09599-RB;
jcf7180002376383_pilon	maker	exon	535576	535675	.	-	.	ID=DT09599-RD:exon:6618;Parent=DT09599-RD,DT09599-RC,DT09599-RA,DT09599-RB;
jcf7180002376383_pilon	maker	exon	535317	535499	.	-	.	ID=DT09599-RD:exon:6617;Parent=DT09599-RD,DT09599-RC,DT09599-RA,DT09599-RB;
jcf7180002376383_pilon	maker	exon	533520	533771	.	-	.	ID=DT09599-RD:exon:6616;Parent=DT09599-RD,DT09599-RC,DT09599-RA,DT09599-RB;
jcf7180002376383_pilon	maker	exon	531794	531938	.	-	.	ID=DT09599-RD:exon:6615;Parent=DT09599-RD,DT09599-RC,DT09599-RA,DT09599-RB;
jcf7180002376383_pilon	maker	exon	531360	531504	.	-	.	ID=DT09599-RD:exon:6614;Parent=DT09599-RD,DT09599-RC,DT09599-RA,DT09599-RB;
jcf7180002376383_pilon	maker	exon	530989	531182	.	-	.	ID=DT09599-RD:exon:6613;Parent=DT09599-RD,DT09599-RC,DT09599-RA,DT09599-RB;
jcf7180002376383_pilon	maker	exon	530325	530445	.	-	.	ID=DT09599-RD:exon:6612;Parent=DT09599-RD,DT09599-RA,DT09599-RB;
jcf7180002376383_pilon	maker	exon	529962	530016	.	-	.	ID=DT09599-RD:exon:6611;Parent=DT09599-RD,DT09599-RC,DT09599-RA,DT09599-RB;
jcf7180002376383_pilon	maker	exon	529585	529750	.	-	.	ID=DT09599-RD:exon:6610;Parent=DT09599-RD,DT09599-RC,DT09599-RA,DT09599-RB;
jcf7180002376383_pilon	maker	exon	528463	528630	.	-	.	ID=DT09599-RD:exon:6609;Parent=DT09599-RD,DT09599-RC,DT09599-RA,DT09599-RB;
jcf7180002376383_pilon	maker	exon	528311	528388	.	-	.	ID=DT09599-RD:exon:6608;Parent=DT09599-RD,DT09599-RC,DT09599-RA,DT09599-RB;
jcf7180002376383_pilon	maker	exon	527075	527194	.	-	.	ID=DT09599-RD:exon:6607;Parent=DT09599-RD,DT09599-RC,DT09599-RA,DT09599-RB;
jcf7180002376383_pilon	maker	exon	526848	526982	.	-	.	ID=DT09599-RD:exon:6606;Parent=DT09599-RD,DT09599-RB;
jcf7180002376383_pilon	maker	exon	526567	526767	.	-	.	ID=DT09599-RD:exon:6605;Parent=DT09599-RD,DT09599-RB;
jcf7180002376383_pilon	maker	exon	525294	525545	.	-	.	ID=DT09599-RD:exon:6604;Parent=DT09599-RD,DT09599-RC,DT09599-RA,DT09599-RB;
jcf7180002376383_pilon	maker	exon	525092	525217	.	-	.	ID=DT09599-RD:exon:6603;Parent=DT09599-RD,DT09599-RC,DT09599-RA,DT09599-RB;
jcf7180002376383_pilon	maker	exon	524887	525012	.	-	.	ID=DT09599-RD:exon:6602;Parent=DT09599-RD,DT09599-RC,DT09599-RA,DT09599-RB;
jcf7180002376383_pilon	maker	exon	524168	524288	.	-	.	ID=DT09599-RD:exon:6601;Parent=DT09599-RD,DT09599-RC,DT09599-RA,DT09599-RB;
jcf7180002376383_pilon	maker	exon	523901	524082	.	-	.	ID=DT09599-RD:exon:6600;Parent=DT09599-RD,DT09599-RC,DT09599-RA,DT09599-RB;
jcf7180002376383_pilon	maker	exon	522175	522323	.	-	.	ID=DT09599-RD:exon:6599;Parent=DT09599-RD,DT09599-RC,DT09599-RA,DT09599-RB;
jcf7180002376383_pilon	maker	exon	521948	522056	.	-	.	ID=DT09599-RD:exon:6598;Parent=DT09599-RD,DT09599-RC,DT09599-RA,DT09599-RB;
jcf7180002376383_pilon	maker	exon	520171	520188	.	-	.	ID=DT09599-RD:exon:6597;Parent=DT09599-RD,DT09599-RC,DT09599-RA,DT09599-RB;
jcf7180002376383_pilon	maker	exon	519651	519782	.	-	.	ID=DT09599-RD:exon:6596;Parent=DT09599-RD,DT09599-RC,DT09599-RA,DT09599-RB;
jcf7180002376383_pilon	maker	exon	519400	519562	.	-	.	ID=DT09599-RD:exon:6595;Parent=DT09599-RD,DT09599-RC,DT09599-RA,DT09599-RB;
jcf7180002376383_pilon	maker	exon	519174	519322	.	-	.	ID=DT09599-RD:exon:6594;Parent=DT09599-RD,DT09599-RC,DT09599-RA,DT09599-RB;
jcf7180002376383_pilon	maker	exon	518894	519094	.	-	.	ID=DT09599-RD:exon:6593;Parent=DT09599-RD,DT09599-RC,DT09599-RA,DT09599-RB;
jcf7180002376383_pilon	maker	exon	518176	518265	.	-	.	ID=DT09599-RD:exon:6592;Parent=DT09599-RD,DT09599-RC,DT09599-RA,DT09599-RB;
jcf7180002376383_pilon	maker	exon	518010	518105	.	-	.	ID=DT09599-RD:exon:6591;Parent=DT09599-RD,DT09599-RC,DT09599-RA,DT09599-RB;
jcf7180002376383_pilon	maker	exon	517844	517945	.	-	.	ID=DT09599-RD:exon:6590;Parent=DT09599-RD,DT09599-RC,DT09599-RA,DT09599-RB;
jcf7180002376383_pilon	maker	exon	517661	517747	.	-	.	ID=DT09599-RD:exon:6589;Parent=DT09599-RD,DT09599-RC,DT09599-RA,DT09599-RB;
jcf7180002376383_pilon	maker	exon	517508	517585	.	-	.	ID=DT09599-RD:exon:6588;Parent=DT09599-RD,DT09599-RC,DT09599-RA,DT09599-RB;
jcf7180002376383_pilon	maker	exon	517212	517404	.	-	.	ID=DT09599-RD:exon:6587;Parent=DT09599-RD,DT09599-RC,DT09599-RA,DT09599-RB;
jcf7180002376383_pilon	maker	exon	515842	516014	.	-	.	ID=DT09599-RD:exon:6586;Parent=DT09599-RD,DT09599-RC,DT09599-RA,DT09599-RB;
jcf7180002376383_pilon	maker	exon	515588	515752	.	-	.	ID=DT09599-RD:exon:6585;Parent=DT09599-RD,DT09599-RC,DT09599-RA,DT09599-RB;
jcf7180002376383_pilon	maker	exon	515102	515291	.	-	.	ID=DT09599-RD:exon:6584;Parent=DT09599-RD,DT09599-RC,DT09599-RA,DT09599-RB;
jcf7180002376383_pilon	maker	exon	513925	514002	.	-	.	ID=DT09599-RD:exon:6583;Parent=DT09599-RD,DT09599-RC,DT09599-RA;
jcf7180002376383_pilon	maker	exon	513725	513846	.	-	.	ID=DT09599-RD:exon:6582;Parent=DT09599-RD,DT09599-RC,DT09599-RA;
jcf7180002376383_pilon	maker	exon	513489	513654	.	-	.	ID=DT09599-RD:exon:6581;Parent=DT09599-RD,DT09599-RC,DT09599-RA,DT09599-RB;
jcf7180002376383_pilon	maker	exon	513231	513391	.	-	.	ID=DT09599-RD:exon:6580;Parent=DT09599-RD,DT09599-RC,DT09599-RA,DT09599-RB;
jcf7180002376383_pilon	maker	exon	511984	512145	.	-	.	ID=DT09599-RD:exon:6579;Parent=DT09599-RD,DT09599-RC,DT09599-RA,DT09599-RB;
jcf7180002376383_pilon	maker	exon	511762	511880	.	-	.	ID=DT09599-RD:exon:6578;Parent=DT09599-RD,DT09599-RC,DT09599-RA,DT09599-RB;
jcf7180002376383_pilon	maker	exon	510421	510539	.	-	.	ID=DT09599-RD:exon:6577;Parent=DT09599-RD,DT09599-RC,DT09599-RA,DT09599-RB;
jcf7180002376383_pilon	maker	exon	509312	509473	.	-	.	ID=DT09599-RD:exon:6576;Parent=DT09599-RD,DT09599-RC,DT09599-RA,DT09599-RB;
jcf7180002376383_pilon	maker	exon	507711	507881	.	-	.	ID=DT09599-RD:exon:6575;Parent=DT09599-RD,DT09599-RC,DT09599-RA,DT09599-RB;
jcf7180002376383_pilon	maker	exon	507167	507244	.	-	.	ID=DT09599-RD:exon:6574;Parent=DT09599-RD,DT09599-RC,DT09599-RA,DT09599-RB;
jcf7180002376383_pilon	maker	exon	506871	507093	.	-	.	ID=DT09599-RD:exon:6573;Parent=DT09599-RD,DT09599-RC,DT09599-RA,DT09599-RB;
jcf7180002376383_pilon	maker	exon	506587	506771	.	-	.	ID=DT09599-RD:exon:6572;Parent=DT09599-RD,DT09599-RC,DT09599-RA,DT09599-RB;
jcf7180002376383_pilon	maker	exon	505462	505641	.	-	.	ID=DT09599-RD:exon:6571;Parent=DT09599-RD,DT09599-RC,DT09599-RA,DT09599-RB;
jcf7180002376383_pilon	maker	exon	503981	504145	.	-	.	ID=DT09599-RD:exon:6570;Parent=DT09599-RD,DT09599-RC,DT09599-RA,DT09599-RB;
jcf7180002376383_pilon	maker	exon	503628	503896	.	-	.	ID=DT09599-RD:exon:6569;Parent=DT09599-RD,DT09599-RC,DT09599-RA,DT09599-RB;
jcf7180002376383_pilon	maker	exon	503389	503551	.	-	.	ID=DT09599-RD:exon:6568;Parent=DT09599-RD,DT09599-RC,DT09599-RA,DT09599-RB;
jcf7180002376383_pilon	maker	exon	503136	503298	.	-	.	ID=DT09599-RD:exon:6567;Parent=DT09599-RD,DT09599-RC,DT09599-RA,DT09599-RB;
jcf7180002376383_pilon	maker	exon	500973	501042	.	-	.	ID=DT09599-RD:exon:6566;Parent=DT09599-RD,DT09599-RC,DT09599-RA,DT09599-RB;
jcf7180002376383_pilon	maker	exon	51715	52026	.	-	.	ID=DT09586-RA:exon:6645;Parent=DT09586-RA;
jcf7180002376383_pilon	maker	exon	54190	54292	.	-	.	ID=DT09586-RA:exon:6644;Parent=DT09586-RA;
jcf7180002376383_pilon	maker	exon	54563	54678	.	-	.	ID=DT09586-RA:exon:6643;Parent=DT09586-RA;
jcf7180002376383_pilon	maker	exon	56184	56300	.	-	.	ID=DT09586-RA:exon:6642;Parent=DT09586-RA;
jcf7180002376383_pilon	maker	exon	56381	56845	.	-	.	ID=DT09586-RA:exon:6641;Parent=DT09586-RA;
jcf7180002376383_pilon	maker	exon	57454	58155	.	-	.	ID=DT09586-RA:exon:6640;Parent=DT09586-RA;
jcf7180002376383_pilon	maker	exon	95616	95720	.	-	.	ID=DT09590-RA:exon:6651;Parent=DT09590-RA;
jcf7180002376383_pilon	maker	exon	95868	96041	.	-	.	ID=DT09590-RA:exon:6650;Parent=DT09590-RA;
jcf7180002376383_pilon	maker	exon	96134	96213	.	-	.	ID=DT09590-RA:exon:6649;Parent=DT09590-RA;
jcf7180002376383_pilon	maker	exon	97652	97837	.	-	.	ID=DT09590-RA:exon:6648;Parent=DT09590-RA;
jcf7180002376383_pilon	maker	exon	97991	98120	.	-	.	ID=DT09590-RA:exon:6647;Parent=DT09590-RA;
jcf7180002376383_pilon	maker	exon	98195	98409	.	-	.	ID=DT09590-RA:exon:6646;Parent=DT09590-RA;
jcf7180002376383_pilon	maker	exon	563913	564036	.	-	.	ID=DT09601-RB:exon:6670;Parent=DT09601-RB;
jcf7180002376383_pilon	maker	exon	560416	562296	.	-	.	ID=DT09601-RA:exon:6669;Parent=DT09601-RA,DT09601-RB;
jcf7180002376383_pilon	maker	exon	562384	562707	.	-	.	ID=DT09601-RA:exon:6668;Parent=DT09601-RA,DT09601-RB;
jcf7180002376383_pilon	maker	exon	562807	562896	.	-	.	ID=DT09601-RA:exon:6667;Parent=DT09601-RA,DT09601-RB;
jcf7180002376383_pilon	maker	exon	562994	563118	.	-	.	ID=DT09601-RA:exon:6666;Parent=DT09601-RA,DT09601-RB;
jcf7180002376383_pilon	maker	exon	563913	564063	.	-	.	ID=DT09601-RA:exon:6665;Parent=DT09601-RA;
jcf7180002376383_pilon	maker	exon	564147	564384	.	-	.	ID=DT09601-RA:exon:6664;Parent=DT09601-RA,DT09601-RB;
jcf7180002376383_pilon	maker	exon	564643	564757	.	-	.	ID=DT09601-RA:exon:6663;Parent=DT09601-RA,DT09601-RB;
jcf7180002376383_pilon	maker	exon	564823	564899	.	-	.	ID=DT09601-RA:exon:6662;Parent=DT09601-RA,DT09601-RB;
jcf7180002376383_pilon	maker	exon	564997	565149	.	-	.	ID=DT09601-RA:exon:6661;Parent=DT09601-RA,DT09601-RB;
jcf7180002376383_pilon	maker	exon	566706	566857	.	-	.	ID=DT09601-RA:exon:6660;Parent=DT09601-RA,DT09601-RB;
jcf7180002376383_pilon	maker	exon	567323	567634	.	-	.	ID=DT09601-RA:exon:6659;Parent=DT09601-RA,DT09601-RB;
jcf7180002376383_pilon	maker	exon	567888	568028	.	-	.	ID=DT09601-RA:exon:6658;Parent=DT09601-RA,DT09601-RB;
jcf7180002376383_pilon	maker	exon	569657	569745	.	-	.	ID=DT09601-RA:exon:6657;Parent=DT09601-RA,DT09601-RB;
jcf7180002376383_pilon	maker	exon	570282	570466	.	-	.	ID=DT09601-RA:exon:6656;Parent=DT09601-RA,DT09601-RB;
jcf7180002376383_pilon	maker	exon	571431	571573	.	-	.	ID=DT09601-RA:exon:6655;Parent=DT09601-RA,DT09601-RB;
jcf7180002376383_pilon	maker	exon	571681	571789	.	-	.	ID=DT09601-RA:exon:6654;Parent=DT09601-RA,DT09601-RB;
jcf7180002376383_pilon	maker	exon	575591	575763	.	-	.	ID=DT09601-RA:exon:6653;Parent=DT09601-RA,DT09601-RB;
jcf7180002376383_pilon	maker	exon	577471	577639	.	-	.	ID=DT09601-RA:exon:6652;Parent=DT09601-RA,DT09601-RB;
jcf7180002376383_pilon	maker	exon	44364	44755	.	-	.	ID=DT09585-RA:exon:6676;Parent=DT09585-RA;
jcf7180002376383_pilon	maker	exon	46068	46141	.	-	.	ID=DT09585-RA:exon:6675;Parent=DT09585-RA;
jcf7180002376383_pilon	maker	exon	46231	46325	.	-	.	ID=DT09585-RA:exon:6674;Parent=DT09585-RA;
jcf7180002376383_pilon	maker	exon	46497	46597	.	-	.	ID=DT09585-RA:exon:6673;Parent=DT09585-RA;
jcf7180002376383_pilon	maker	exon	47889	48007	.	-	.	ID=DT09585-RA:exon:6672;Parent=DT09585-RA;
jcf7180002376383_pilon	maker	exon	48077	48315	.	-	.	ID=DT09585-RA:exon:6671;Parent=DT09585-RA;
jcf7180002376383_pilon	maker	exon	369663	369694	.	-	.	ID=DT09594-RA:exon:6678;Parent=DT09594-RA;
jcf7180002376383_pilon	maker	exon	371268	372039	.	-	.	ID=DT09594-RA:exon:6677;Parent=DT09594-RA;
jcf7180002376383_pilon	maker	exon	14984	15060	.	+	.	ID=DT09583-RA:exon:6679;Parent=DT09583-RA;
jcf7180002376383_pilon	maker	exon	281330	281404	.	-	.	ID=DT09592-RA:exon:6680;Parent=DT09592-RA;
jcf7180002373585_pilon	maker	exon	121485	121812	.	+	.	ID=DT12805-RA:exon:320;Parent=DT12805-RA;
jcf7180002373585_pilon	maker	exon	122547	122688	.	+	.	ID=DT12805-RA:exon:321;Parent=DT12805-RA;
jcf7180002373585_pilon	maker	exon	122789	122818	.	+	.	ID=DT12805-RA:exon:322;Parent=DT12805-RA;
jcf7180002373585_pilon	maker	exon	122923	123069	.	+	.	ID=DT12805-RA:exon:323;Parent=DT12805-RA;
jcf7180002373585_pilon	maker	exon	125089	125157	.	+	.	ID=DT12805-RA:exon:324;Parent=DT12805-RA;
jcf7180002373585_pilon	maker	exon	125232	125372	.	+	.	ID=DT12805-RA:exon:325;Parent=DT12805-RA;
jcf7180002373585_pilon	maker	exon	125459	125560	.	+	.	ID=DT12805-RA:exon:326;Parent=DT12805-RA;
jcf7180002373585_pilon	maker	exon	127501	127607	.	+	.	ID=DT12805-RA:exon:327;Parent=DT12805-RA;
jcf7180002373585_pilon	maker	exon	128748	131738	.	+	.	ID=DT12805-RA:exon:328;Parent=DT12805-RA;
jcf7180002373585_pilon	maker	exon	132054	132164	.	+	.	ID=DT12805-RA:exon:329;Parent=DT12805-RA;
jcf7180002373585_pilon	maker	exon	135075	135114	.	+	.	ID=DT12805-RA:exon:330;Parent=DT12805-RA;
jcf7180002373585_pilon	maker	exon	95095	95163	.	+	.	ID=DT12804-RA:exon:331;Parent=DT12804-RA;
jcf7180002373585_pilon	maker	exon	97527	97633	.	+	.	ID=DT12804-RA:exon:332;Parent=DT12804-RA;
jcf7180002373585_pilon	maker	exon	97866	97960	.	+	.	ID=DT12804-RA:exon:333;Parent=DT12804-RA;
jcf7180002373585_pilon	maker	exon	99625	99753	.	+	.	ID=DT12804-RA:exon:334;Parent=DT12804-RA;
jcf7180002373585_pilon	maker	exon	101647	101802	.	+	.	ID=DT12804-RA:exon:335;Parent=DT12804-RA;
jcf7180002373585_pilon	maker	exon	103196	103380	.	+	.	ID=DT12804-RA:exon:336;Parent=DT12804-RA;
jcf7180002373585_pilon	maker	exon	106108	106191	.	+	.	ID=DT12804-RA:exon:337;Parent=DT12804-RA;
jcf7180002373585_pilon	maker	exon	106277	107701	.	+	.	ID=DT12804-RA:exon:338;Parent=DT12804-RA;
jcf7180002373585_pilon	maker	exon	350233	350302	.	+	.	ID=DT12810-RA:exon:339;Parent=DT12810-RA,DT12810-RB;
jcf7180002373585_pilon	maker	exon	350391	350494	.	+	.	ID=DT12810-RA:exon:340;Parent=DT12810-RA,DT12810-RB;
jcf7180002373585_pilon	maker	exon	364104	364274	.	+	.	ID=DT12810-RA:exon:341;Parent=DT12810-RA,DT12810-RB;
jcf7180002373585_pilon	maker	exon	368069	368267	.	+	.	ID=DT12810-RA:exon:342;Parent=DT12810-RA,DT12810-RB;
jcf7180002373585_pilon	maker	exon	372622	373262	.	+	.	ID=DT12810-RA:exon:343;Parent=DT12810-RA;
jcf7180002373585_pilon	maker	exon	373308	373927	.	+	.	ID=DT12810-RA:exon:344;Parent=DT12810-RA;
jcf7180002373585_pilon	maker	exon	372622	373927	.	+	.	ID=DT12810-RB:exon:345;Parent=DT12810-RB;
jcf7180002373585_pilon	maker	exon	337409	337469	.	+	.	ID=DT12809-RA:exon:346;Parent=DT12809-RA;
jcf7180002373585_pilon	maker	exon	339002	339259	.	+	.	ID=DT12809-RA:exon:347;Parent=DT12809-RA;
jcf7180002373585_pilon	maker	exon	344147	344257	.	+	.	ID=DT12809-RA:exon:348;Parent=DT12809-RA;
jcf7180002373585_pilon	maker	exon	346479	346579	.	+	.	ID=DT12809-RA:exon:349;Parent=DT12809-RA;
jcf7180002373585_pilon	maker	exon	64207	64354	.	+	.	ID=DT12803-RA:exon:350;Parent=DT12803-RA;
jcf7180002373585_pilon	maker	exon	66470	66510	.	+	.	ID=DT12803-RA:exon:351;Parent=DT12803-RA;
jcf7180002373585_pilon	maker	exon	66746	66830	.	+	.	ID=DT12803-RA:exon:352;Parent=DT12803-RA;
jcf7180002373585_pilon	maker	exon	66909	66927	.	+	.	ID=DT12803-RA:exon:353;Parent=DT12803-RA;
jcf7180002373585_pilon	maker	exon	70070	70165	.	+	.	ID=DT12803-RA:exon:354;Parent=DT12803-RA;
jcf7180002373585_pilon	maker	exon	72595	72643	.	+	.	ID=DT12803-RA:exon:355;Parent=DT12803-RA;
jcf7180002373585_pilon	maker	exon	415845	415948	.	+	.	ID=DT12811-RA:exon:356;Parent=DT12811-RA;
jcf7180002373585_pilon	maker	exon	417517	417619	.	+	.	ID=DT12811-RA:exon:357;Parent=DT12811-RA;
jcf7180002373585_pilon	maker	exon	420079	420161	.	+	.	ID=DT12811-RA:exon:358;Parent=DT12811-RA;
jcf7180002373585_pilon	maker	exon	423809	423869	.	+	.	ID=DT12811-RA:exon:359;Parent=DT12811-RA;
jcf7180002373585_pilon	maker	exon	426646	426936	.	+	.	ID=DT12811-RA:exon:360;Parent=DT12811-RA;
jcf7180002373585_pilon	maker	exon	430884	430952	.	+	.	ID=DT12811-RA:exon:361;Parent=DT12811-RA;
jcf7180002373585_pilon	maker	exon	432542	432568	.	+	.	ID=DT12811-RA:exon:362;Parent=DT12811-RA;
jcf7180002373585_pilon	maker	exon	442356	442490	.	+	.	ID=DT12811-RA:exon:363;Parent=DT12811-RA;
jcf7180002373585_pilon	maker	exon	446665	446670	.	+	.	ID=DT12811-RA:exon:364;Parent=DT12811-RA;
jcf7180002373585_pilon	maker	exon	53029	53249	.	-	.	ID=DT12801-RA:exon:367;Parent=DT12801-RA;
jcf7180002373585_pilon	maker	exon	53327	53665	.	-	.	ID=DT12801-RA:exon:366;Parent=DT12801-RA;
jcf7180002373585_pilon	maker	exon	53735	53791	.	-	.	ID=DT12801-RA:exon:365;Parent=DT12801-RA;
jcf7180002373585_pilon	maker	exon	12996	13382	.	-	.	ID=DT12800-RA:exon:369;Parent=DT12800-RA;
jcf7180002373585_pilon	maker	exon	4727	5248	.	-	.	ID=DT12800-RA:exon:368;Parent=DT12800-RA;
jcf7180002373585_pilon	maker	exon	160097	161449	.	-	.	ID=DT12807-RA:exon:447;Parent=DT12807-RA;
jcf7180002373585_pilon	maker	exon	166182	166274	.	-	.	ID=DT12807-RA:exon:446;Parent=DT12807-RA;
jcf7180002373585_pilon	maker	exon	168164	168284	.	-	.	ID=DT12807-RA:exon:445;Parent=DT12807-RA;
jcf7180002373585_pilon	maker	exon	173693	173936	.	-	.	ID=DT12807-RA:exon:444;Parent=DT12807-RA;
jcf7180002373585_pilon	maker	exon	174127	174285	.	-	.	ID=DT12807-RA:exon:443;Parent=DT12807-RA;
jcf7180002373585_pilon	maker	exon	176408	176473	.	-	.	ID=DT12807-RA:exon:442;Parent=DT12807-RA;
jcf7180002373585_pilon	maker	exon	178739	178804	.	-	.	ID=DT12807-RA:exon:441;Parent=DT12807-RA;
jcf7180002373585_pilon	maker	exon	180893	180931	.	-	.	ID=DT12807-RA:exon:440;Parent=DT12807-RA;
jcf7180002373585_pilon	maker	exon	181900	182036	.	-	.	ID=DT12807-RA:exon:439;Parent=DT12807-RA;
jcf7180002373585_pilon	maker	exon	182119	182230	.	-	.	ID=DT12807-RA:exon:438;Parent=DT12807-RA;
jcf7180002373585_pilon	maker	exon	185116	185282	.	-	.	ID=DT12807-RA:exon:437;Parent=DT12807-RA;
jcf7180002373585_pilon	maker	exon	187299	187456	.	-	.	ID=DT12807-RA:exon:436;Parent=DT12807-RA;
jcf7180002373585_pilon	maker	exon	188081	188166	.	-	.	ID=DT12807-RA:exon:435;Parent=DT12807-RA;
jcf7180002373585_pilon	maker	exon	189363	189564	.	-	.	ID=DT12807-RA:exon:434;Parent=DT12807-RA;
jcf7180002373585_pilon	maker	exon	192738	192812	.	-	.	ID=DT12807-RA:exon:433;Parent=DT12807-RA;
jcf7180002373585_pilon	maker	exon	193119	193180	.	-	.	ID=DT12807-RA:exon:432;Parent=DT12807-RA;
jcf7180002373585_pilon	maker	exon	200021	200130	.	-	.	ID=DT12807-RA:exon:431;Parent=DT12807-RA;
jcf7180002373585_pilon	maker	exon	200735	200882	.	-	.	ID=DT12807-RA:exon:430;Parent=DT12807-RA;
jcf7180002373585_pilon	maker	exon	206000	206060	.	-	.	ID=DT12807-RA:exon:429;Parent=DT12807-RA;
jcf7180002373585_pilon	maker	exon	206228	206306	.	-	.	ID=DT12807-RA:exon:428;Parent=DT12807-RA;
jcf7180002373585_pilon	maker	exon	209659	209805	.	-	.	ID=DT12807-RA:exon:427;Parent=DT12807-RA;
jcf7180002373585_pilon	maker	exon	212067	212335	.	-	.	ID=DT12807-RA:exon:426;Parent=DT12807-RA;
jcf7180002373585_pilon	maker	exon	212419	212536	.	-	.	ID=DT12807-RA:exon:425;Parent=DT12807-RA;
jcf7180002373585_pilon	maker	exon	213730	213886	.	-	.	ID=DT12807-RA:exon:424;Parent=DT12807-RA;
jcf7180002373585_pilon	maker	exon	215557	215729	.	-	.	ID=DT12807-RA:exon:423;Parent=DT12807-RA;
jcf7180002373585_pilon	maker	exon	216611	216784	.	-	.	ID=DT12807-RA:exon:422;Parent=DT12807-RA;
jcf7180002373585_pilon	maker	exon	218083	218239	.	-	.	ID=DT12807-RA:exon:421;Parent=DT12807-RA;
jcf7180002373585_pilon	maker	exon	219910	220082	.	-	.	ID=DT12807-RA:exon:420;Parent=DT12807-RA;
jcf7180002373585_pilon	maker	exon	220966	221139	.	-	.	ID=DT12807-RA:exon:419;Parent=DT12807-RA;
jcf7180002373585_pilon	maker	exon	222717	222906	.	-	.	ID=DT12807-RA:exon:418;Parent=DT12807-RA;
jcf7180002373585_pilon	maker	exon	223084	223238	.	-	.	ID=DT12807-RA:exon:417;Parent=DT12807-RA;
jcf7180002373585_pilon	maker	exon	223365	223576	.	-	.	ID=DT12807-RA:exon:416;Parent=DT12807-RA;
jcf7180002373585_pilon	maker	exon	228256	228423	.	-	.	ID=DT12807-RA:exon:415;Parent=DT12807-RA;
jcf7180002373585_pilon	maker	exon	228793	229027	.	-	.	ID=DT12807-RA:exon:414;Parent=DT12807-RA;
jcf7180002373585_pilon	maker	exon	230513	230686	.	-	.	ID=DT12807-RA:exon:413;Parent=DT12807-RA;
jcf7180002373585_pilon	maker	exon	231192	231301	.	-	.	ID=DT12807-RA:exon:412;Parent=DT12807-RA;
jcf7180002373585_pilon	maker	exon	234033	234221	.	-	.	ID=DT12807-RA:exon:411;Parent=DT12807-RA;
jcf7180002373585_pilon	maker	exon	237630	237737	.	-	.	ID=DT12807-RA:exon:410;Parent=DT12807-RA;
jcf7180002373585_pilon	maker	exon	238282	238380	.	-	.	ID=DT12807-RA:exon:409;Parent=DT12807-RA;
jcf7180002373585_pilon	maker	exon	240670	240787	.	-	.	ID=DT12807-RA:exon:408;Parent=DT12807-RA;
jcf7180002373585_pilon	maker	exon	242134	242300	.	-	.	ID=DT12807-RA:exon:407;Parent=DT12807-RA;
jcf7180002373585_pilon	maker	exon	242422	242503	.	-	.	ID=DT12807-RA:exon:406;Parent=DT12807-RA;
jcf7180002373585_pilon	maker	exon	242703	242783	.	-	.	ID=DT12807-RA:exon:405;Parent=DT12807-RA;
jcf7180002373585_pilon	maker	exon	245678	245827	.	-	.	ID=DT12807-RA:exon:404;Parent=DT12807-RA;
jcf7180002373585_pilon	maker	exon	247593	247724	.	-	.	ID=DT12807-RA:exon:403;Parent=DT12807-RA;
jcf7180002373585_pilon	maker	exon	249876	250023	.	-	.	ID=DT12807-RA:exon:402;Parent=DT12807-RA;
jcf7180002373585_pilon	maker	exon	250177	250352	.	-	.	ID=DT12807-RA:exon:401;Parent=DT12807-RA;
jcf7180002373585_pilon	maker	exon	251660	251783	.	-	.	ID=DT12807-RA:exon:400;Parent=DT12807-RA;
jcf7180002373585_pilon	maker	exon	252150	252295	.	-	.	ID=DT12807-RA:exon:399;Parent=DT12807-RA;
jcf7180002373585_pilon	maker	exon	252478	252588	.	-	.	ID=DT12807-RA:exon:398;Parent=DT12807-RA;
jcf7180002373585_pilon	maker	exon	253240	253410	.	-	.	ID=DT12807-RA:exon:397;Parent=DT12807-RA;
jcf7180002373585_pilon	maker	exon	253567	253719	.	-	.	ID=DT12807-RA:exon:396;Parent=DT12807-RA;
jcf7180002373585_pilon	maker	exon	256674	256808	.	-	.	ID=DT12807-RA:exon:395;Parent=DT12807-RA;
jcf7180002373585_pilon	maker	exon	257914	258030	.	-	.	ID=DT12807-RA:exon:394;Parent=DT12807-RA;
jcf7180002373585_pilon	maker	exon	259777	259947	.	-	.	ID=DT12807-RA:exon:393;Parent=DT12807-RA;
jcf7180002373585_pilon	maker	exon	261243	261356	.	-	.	ID=DT12807-RA:exon:392;Parent=DT12807-RA;
jcf7180002373585_pilon	maker	exon	264313	264492	.	-	.	ID=DT12807-RA:exon:391;Parent=DT12807-RA;
jcf7180002373585_pilon	maker	exon	264730	264900	.	-	.	ID=DT12807-RA:exon:390;Parent=DT12807-RA;
jcf7180002373585_pilon	maker	exon	267186	267341	.	-	.	ID=DT12807-RA:exon:389;Parent=DT12807-RA;
jcf7180002373585_pilon	maker	exon	267519	267677	.	-	.	ID=DT12807-RA:exon:388;Parent=DT12807-RA;
jcf7180002373585_pilon	maker	exon	269120	269281	.	-	.	ID=DT12807-RA:exon:387;Parent=DT12807-RA;
jcf7180002373585_pilon	maker	exon	269364	269516	.	-	.	ID=DT12807-RA:exon:386;Parent=DT12807-RA;
jcf7180002373585_pilon	maker	exon	271536	271670	.	-	.	ID=DT12807-RA:exon:385;Parent=DT12807-RA;
jcf7180002373585_pilon	maker	exon	271974	272156	.	-	.	ID=DT12807-RA:exon:384;Parent=DT12807-RA;
jcf7180002373585_pilon	maker	exon	275147	275317	.	-	.	ID=DT12807-RA:exon:383;Parent=DT12807-RA;
jcf7180002373585_pilon	maker	exon	275497	275652	.	-	.	ID=DT12807-RA:exon:382;Parent=DT12807-RA;
jcf7180002373585_pilon	maker	exon	276128	276241	.	-	.	ID=DT12807-RA:exon:381;Parent=DT12807-RA;
jcf7180002373585_pilon	maker	exon	278547	278631	.	-	.	ID=DT12807-RA:exon:380;Parent=DT12807-RA;
jcf7180002373585_pilon	maker	exon	278808	279013	.	-	.	ID=DT12807-RA:exon:379;Parent=DT12807-RA;
jcf7180002373585_pilon	maker	exon	279324	279469	.	-	.	ID=DT12807-RA:exon:378;Parent=DT12807-RA;
jcf7180002373585_pilon	maker	exon	282202	282382	.	-	.	ID=DT12807-RA:exon:377;Parent=DT12807-RA;
jcf7180002373585_pilon	maker	exon	287530	287771	.	-	.	ID=DT12807-RA:exon:376;Parent=DT12807-RA;
jcf7180002373585_pilon	maker	exon	288083	288170	.	-	.	ID=DT12807-RA:exon:375;Parent=DT12807-RA;
jcf7180002373585_pilon	maker	exon	288262	288385	.	-	.	ID=DT12807-RA:exon:374;Parent=DT12807-RA;
jcf7180002373585_pilon	maker	exon	289655	289830	.	-	.	ID=DT12807-RA:exon:373;Parent=DT12807-RA;
jcf7180002373585_pilon	maker	exon	291786	291965	.	-	.	ID=DT12807-RA:exon:372;Parent=DT12807-RA;
jcf7180002373585_pilon	maker	exon	295888	296004	.	-	.	ID=DT12807-RA:exon:371;Parent=DT12807-RA;
jcf7180002373585_pilon	maker	exon	296100	296159	.	-	.	ID=DT12807-RA:exon:370;Parent=DT12807-RA;
jcf7180002373585_pilon	maker	exon	58866	59352	.	-	.	ID=DT12802-RB:exon:453;Parent=DT12802-RB;
jcf7180002373585_pilon	maker	exon	58330	58640	.	-	.	ID=DT12802-RA:exon:452;Parent=DT12802-RA;
jcf7180002373585_pilon	maker	exon	58735	58833	.	-	.	ID=DT12802-RA:exon:451;Parent=DT12802-RA;
jcf7180002373585_pilon	maker	exon	59050	59352	.	-	.	ID=DT12802-RA:exon:450;Parent=DT12802-RA;
jcf7180002373585_pilon	maker	exon	60854	61189	.	-	.	ID=DT12802-RA:exon:449;Parent=DT12802-RA,DT12802-RB;
jcf7180002373585_pilon	maker	exon	61282	61330	.	-	.	ID=DT12802-RA:exon:448;Parent=DT12802-RA,DT12802-RB;
jcf7180002373585_pilon	maker	exon	134326	134484	.	-	.	ID=DT12806-RA:exon:481;Parent=DT12806-RA;
jcf7180002373585_pilon	maker	exon	134505	134933	.	-	.	ID=DT12806-RA:exon:480;Parent=DT12806-RA;
jcf7180002373585_pilon	maker	exon	135585	135696	.	-	.	ID=DT12806-RA:exon:479;Parent=DT12806-RA;
jcf7180002373585_pilon	maker	exon	135767	135862	.	-	.	ID=DT12806-RA:exon:478;Parent=DT12806-RA;
jcf7180002373585_pilon	maker	exon	135939	136039	.	-	.	ID=DT12806-RA:exon:477;Parent=DT12806-RA;
jcf7180002373585_pilon	maker	exon	136487	136645	.	-	.	ID=DT12806-RA:exon:476;Parent=DT12806-RA;
jcf7180002373585_pilon	maker	exon	136877	137050	.	-	.	ID=DT12806-RA:exon:475;Parent=DT12806-RA;
jcf7180002373585_pilon	maker	exon	137148	137255	.	-	.	ID=DT12806-RA:exon:474;Parent=DT12806-RA;
jcf7180002373585_pilon	maker	exon	138885	138965	.	-	.	ID=DT12806-RA:exon:473;Parent=DT12806-RA;
jcf7180002373585_pilon	maker	exon	139149	139246	.	-	.	ID=DT12806-RA:exon:472;Parent=DT12806-RA;
jcf7180002373585_pilon	maker	exon	139476	139563	.	-	.	ID=DT12806-RA:exon:471;Parent=DT12806-RA;
jcf7180002373585_pilon	maker	exon	139684	139761	.	-	.	ID=DT12806-RA:exon:470;Parent=DT12806-RA;
jcf7180002373585_pilon	maker	exon	140879	140929	.	-	.	ID=DT12806-RA:exon:469;Parent=DT12806-RA;
jcf7180002373585_pilon	maker	exon	141001	141073	.	-	.	ID=DT12806-RA:exon:468;Parent=DT12806-RA;
jcf7180002373585_pilon	maker	exon	141149	141239	.	-	.	ID=DT12806-RA:exon:467;Parent=DT12806-RA;
jcf7180002373585_pilon	maker	exon	143024	143132	.	-	.	ID=DT12806-RA:exon:466;Parent=DT12806-RA;
jcf7180002373585_pilon	maker	exon	143514	143622	.	-	.	ID=DT12806-RA:exon:465;Parent=DT12806-RA;
jcf7180002373585_pilon	maker	exon	144687	144793	.	-	.	ID=DT12806-RA:exon:464;Parent=DT12806-RA;
jcf7180002373585_pilon	maker	exon	146452	146490	.	-	.	ID=DT12806-RA:exon:463;Parent=DT12806-RA;
jcf7180002373585_pilon	maker	exon	146562	146657	.	-	.	ID=DT12806-RA:exon:462;Parent=DT12806-RA;
jcf7180002373585_pilon	maker	exon	146834	146920	.	-	.	ID=DT12806-RA:exon:461;Parent=DT12806-RA;
jcf7180002373585_pilon	maker	exon	147185	147285	.	-	.	ID=DT12806-RA:exon:460;Parent=DT12806-RA;
jcf7180002373585_pilon	maker	exon	149229	149535	.	-	.	ID=DT12806-RA:exon:459;Parent=DT12806-RA;
jcf7180002373585_pilon	maker	exon	151382	151503	.	-	.	ID=DT12806-RA:exon:458;Parent=DT12806-RA;
jcf7180002373585_pilon	maker	exon	152244	152406	.	-	.	ID=DT12806-RA:exon:457;Parent=DT12806-RA;
jcf7180002373585_pilon	maker	exon	152519	152633	.	-	.	ID=DT12806-RA:exon:456;Parent=DT12806-RA;
jcf7180002373585_pilon	maker	exon	153631	153765	.	-	.	ID=DT12806-RA:exon:455;Parent=DT12806-RA;
jcf7180002373585_pilon	maker	exon	153925	154042	.	-	.	ID=DT12806-RA:exon:454;Parent=DT12806-RA;
jcf7180002373585_pilon	maker	exon	177556	177630	.	+	.	ID=DT12808-RA:exon:482;Parent=DT12808-RA;
jcf7180002376326_pilon	maker	exon	43637	43988	.	+	.	ID=DT28282-RA:exon:4714;Parent=DT28282-RA;
jcf7180002376326_pilon	maker	exon	46839	49841	.	+	.	ID=DT28282-RA:exon:4715;Parent=DT28282-RA;
jcf7180002376326_pilon	maker	exon	57609	57739	.	+	.	ID=DT28283-RA:exon:4716;Parent=DT28283-RA;
jcf7180002376326_pilon	maker	exon	66053	66101	.	+	.	ID=DT28283-RA:exon:4717;Parent=DT28283-RA;
jcf7180002376326_pilon	maker	exon	69264	69304	.	+	.	ID=DT28283-RA:exon:4718;Parent=DT28283-RA;
jcf7180002376326_pilon	maker	exon	76940	77001	.	+	.	ID=DT28283-RA:exon:4719;Parent=DT28283-RA;
jcf7180002376326_pilon	maker	exon	79628	79764	.	+	.	ID=DT28283-RA:exon:4720;Parent=DT28283-RA;
jcf7180002376326_pilon	maker	exon	86332	86372	.	+	.	ID=DT28283-RA:exon:4721;Parent=DT28283-RA;
jcf7180002376326_pilon	maker	exon	98682	98823	.	+	.	ID=DT28283-RA:exon:4722;Parent=DT28283-RA;
jcf7180002376326_pilon	maker	exon	103058	103192	.	+	.	ID=DT28283-RA:exon:4723;Parent=DT28283-RA;
jcf7180002376326_pilon	maker	exon	109706	112461	.	+	.	ID=DT28283-RA:exon:4724;Parent=DT28283-RA;
jcf7180002376326_pilon	maker	exon	3019	3178	.	-	.	ID=DT28281-RA:exon:4728;Parent=DT28281-RA;
jcf7180002376326_pilon	maker	exon	3275	3379	.	-	.	ID=DT28281-RA:exon:4727;Parent=DT28281-RA;
jcf7180002376326_pilon	maker	exon	3524	3787	.	-	.	ID=DT28281-RA:exon:4726;Parent=DT28281-RA;
jcf7180002376326_pilon	maker	exon	6179	6305	.	-	.	ID=DT28281-RA:exon:4725;Parent=DT28281-RA;
jcf7180002375347_pilon	maker	exon	70841	70967	.	+	.	ID=DT21636-RA:exon:3537;Parent=DT21636-RA;
jcf7180002375347_pilon	maker	exon	74278	74396	.	+	.	ID=DT21636-RA:exon:3538;Parent=DT21636-RA;
jcf7180002375347_pilon	maker	exon	81846	81917	.	+	.	ID=DT21636-RA:exon:3539;Parent=DT21636-RA;
jcf7180002375347_pilon	maker	exon	83963	84172	.	+	.	ID=DT21636-RA:exon:3540;Parent=DT21636-RA;
jcf7180002375347_pilon	maker	exon	85426	90277	.	+	.	ID=DT21636-RA:exon:3541;Parent=DT21636-RA;
jcf7180002375347_pilon	maker	exon	156893	156982	.	+	.	ID=DT21638-RB:exon:3542;Parent=DT21638-RB,DT21638-RA;
jcf7180002375347_pilon	maker	exon	160055	160070	.	+	.	ID=DT21638-RB:exon:3543;Parent=DT21638-RB,DT21638-RA;
jcf7180002375347_pilon	maker	exon	160152	160388	.	+	.	ID=DT21638-RB:exon:3544;Parent=DT21638-RB,DT21638-RA,DT21638-RC;
jcf7180002375347_pilon	maker	exon	160523	160656	.	+	.	ID=DT21638-RB:exon:3545;Parent=DT21638-RB,DT21638-RA,DT21638-RD,DT21638-RE,DT21638-RF;
jcf7180002375347_pilon	maker	exon	162053	162141	.	+	.	ID=DT21638-RB:exon:3546;Parent=DT21638-RB,DT21638-RA,DT21638-RD,DT21638-RC,DT21638-RE,DT21638-RF;
jcf7180002375347_pilon	maker	exon	162773	162869	.	+	.	ID=DT21638-RB:exon:3547;Parent=DT21638-RB,DT21638-RA,DT21638-RD,DT21638-RC,DT21638-RE,DT21638-RF;
jcf7180002375347_pilon	maker	exon	164914	165012	.	+	.	ID=DT21638-RB:exon:3548;Parent=DT21638-RB,DT21638-RA,DT21638-RD,DT21638-RC,DT21638-RE,DT21638-RF;
jcf7180002375347_pilon	maker	exon	168209	168358	.	+	.	ID=DT21638-RB:exon:3549;Parent=DT21638-RB,DT21638-RA,DT21638-RD,DT21638-RC,DT21638-RE,DT21638-RF;
jcf7180002375347_pilon	maker	exon	168441	168581	.	+	.	ID=DT21638-RB:exon:3550;Parent=DT21638-RB,DT21638-RA,DT21638-RD,DT21638-RC,DT21638-RE,DT21638-RF;
jcf7180002375347_pilon	maker	exon	171152	171240	.	+	.	ID=DT21638-RB:exon:3551;Parent=DT21638-RB,DT21638-RA,DT21638-RD,DT21638-RC,DT21638-RE,DT21638-RF;
jcf7180002375347_pilon	maker	exon	171319	171440	.	+	.	ID=DT21638-RB:exon:3552;Parent=DT21638-RB,DT21638-RA,DT21638-RD,DT21638-RC,DT21638-RE,DT21638-RF;
jcf7180002375347_pilon	maker	exon	171743	171855	.	+	.	ID=DT21638-RB:exon:3553;Parent=DT21638-RB,DT21638-RA,DT21638-RD,DT21638-RC,DT21638-RE,DT21638-RF;
jcf7180002375347_pilon	maker	exon	174462	174590	.	+	.	ID=DT21638-RB:exon:3554;Parent=DT21638-RB,DT21638-RA,DT21638-RD,DT21638-RC,DT21638-RE,DT21638-RF;
jcf7180002375347_pilon	maker	exon	176093	176232	.	+	.	ID=DT21638-RB:exon:3555;Parent=DT21638-RB,DT21638-RA,DT21638-RD,DT21638-RE,DT21638-RF;
jcf7180002375347_pilon	maker	exon	179153	179294	.	+	.	ID=DT21638-RB:exon:3556;Parent=DT21638-RB,DT21638-RA,DT21638-RD,DT21638-RE,DT21638-RF;
jcf7180002375347_pilon	maker	exon	182828	182925	.	+	.	ID=DT21638-RB:exon:3557;Parent=DT21638-RB,DT21638-RA,DT21638-RD,DT21638-RC,DT21638-RE,DT21638-RF;
jcf7180002375347_pilon	maker	exon	183007	183091	.	+	.	ID=DT21638-RB:exon:3558;Parent=DT21638-RB,DT21638-RA,DT21638-RD,DT21638-RE,DT21638-RF;
jcf7180002375347_pilon	maker	exon	183778	183846	.	+	.	ID=DT21638-RB:exon:3559;Parent=DT21638-RB,DT21638-RA,DT21638-RD,DT21638-RC,DT21638-RE,DT21638-RF;
jcf7180002375347_pilon	maker	exon	183929	184010	.	+	.	ID=DT21638-RB:exon:3560;Parent=DT21638-RB,DT21638-RA,DT21638-RD,DT21638-RC,DT21638-RE,DT21638-RF;
jcf7180002375347_pilon	maker	exon	184165	184245	.	+	.	ID=DT21638-RB:exon:3561;Parent=DT21638-RB,DT21638-RA,DT21638-RD,DT21638-RE;
jcf7180002375347_pilon	maker	exon	184319	184386	.	+	.	ID=DT21638-RB:exon:3562;Parent=DT21638-RB,DT21638-RA,DT21638-RD,DT21638-RE;
jcf7180002375347_pilon	maker	exon	188673	188732	.	+	.	ID=DT21638-RB:exon:3563;Parent=DT21638-RB,DT21638-RA,DT21638-RD,DT21638-RC,DT21638-RE,DT21638-RF;
jcf7180002375347_pilon	maker	exon	190672	190755	.	+	.	ID=DT21638-RB:exon:3564;Parent=DT21638-RB,DT21638-RA,DT21638-RD,DT21638-RC,DT21638-RE,DT21638-RF;
jcf7180002375347_pilon	maker	exon	190855	191120	.	+	.	ID=DT21638-RB:exon:3565;Parent=DT21638-RB,DT21638-RD;
jcf7180002375347_pilon	maker	exon	191320	191564	.	+	.	ID=DT21638-RB:exon:3566;Parent=DT21638-RB,DT21638-RD;
jcf7180002375347_pilon	maker	exon	190855	191564	.	+	.	ID=DT21638-RA:exon:3567;Parent=DT21638-RA,DT21638-RC,DT21638-RE,DT21638-RF;
jcf7180002375347_pilon	maker	exon	160079	160388	.	+	.	ID=DT21638-RD:exon:3568;Parent=DT21638-RD,DT21638-RE,DT21638-RF;
jcf7180002375347_pilon	maker	exon	158440	158535	.	+	.	ID=DT21638-RC:exon:3569;Parent=DT21638-RC;
jcf7180002375347_pilon	maker	exon	160790	160881	.	+	.	ID=DT21638-RC:exon:3570;Parent=DT21638-RC;
jcf7180002375347_pilon	maker	exon	176093	176222	.	+	.	ID=DT21638-RC:exon:3571;Parent=DT21638-RC;
jcf7180002375347_pilon	maker	exon	179191	179294	.	+	.	ID=DT21638-RC:exon:3572;Parent=DT21638-RC;
jcf7180002375347_pilon	maker	exon	183007	183196	.	+	.	ID=DT21638-RC:exon:3573;Parent=DT21638-RC;
jcf7180002375347_pilon	maker	exon	184165	184386	.	+	.	ID=DT21638-RC:exon:3574;Parent=DT21638-RC,DT21638-RF;
jcf7180002375347_pilon	maker	exon	192915	192955	.	+	.	ID=DT21639-RE:exon:3575;Parent=DT21639-RE,DT21639-RA,DT21639-RC,DT21639-RB,DT21639-RD,DT21639-RF,DT21639-RG;
jcf7180002375347_pilon	maker	exon	193827	193874	.	+	.	ID=DT21639-RE:exon:3576;Parent=DT21639-RE,DT21639-RA,DT21639-RC,DT21639-RB,DT21639-RD,DT21639-RF,DT21639-RG;
jcf7180002375347_pilon	maker	exon	195872	195968	.	+	.	ID=DT21639-RE:exon:3577;Parent=DT21639-RE,DT21639-RA,DT21639-RC,DT21639-RB,DT21639-RF;
jcf7180002375347_pilon	maker	exon	197110	197251	.	+	.	ID=DT21639-RE:exon:3578;Parent=DT21639-RE,DT21639-RA,DT21639-RC,DT21639-RB,DT21639-RF;
jcf7180002375347_pilon	maker	exon	198184	198270	.	+	.	ID=DT21639-RE:exon:3579;Parent=DT21639-RE,DT21639-RA,DT21639-RB,DT21639-RD,DT21639-RG;
jcf7180002375347_pilon	maker	exon	198364	198492	.	+	.	ID=DT21639-RE:exon:3580;Parent=DT21639-RE,DT21639-RA,DT21639-RB,DT21639-RD,DT21639-RG;
jcf7180002375347_pilon	maker	exon	199807	199878	.	+	.	ID=DT21639-RE:exon:3581;Parent=DT21639-RE,DT21639-RA,DT21639-RC,DT21639-RB,DT21639-RD,DT21639-RF,DT21639-RG;
jcf7180002375347_pilon	maker	exon	199975	200114	.	+	.	ID=DT21639-RE:exon:3582;Parent=DT21639-RE,DT21639-RA,DT21639-RC,DT21639-RB,DT21639-RD,DT21639-RF,DT21639-RG;
jcf7180002375347_pilon	maker	exon	200189	200334	.	+	.	ID=DT21639-RE:exon:3583;Parent=DT21639-RE,DT21639-RA,DT21639-RC,DT21639-RB,DT21639-RD,DT21639-RF,DT21639-RG;
jcf7180002375347_pilon	maker	exon	202082	202101	.	+	.	ID=DT21639-RE:exon:3584;Parent=DT21639-RE,DT21639-RA,DT21639-RC,DT21639-RB,DT21639-RD,DT21639-RF,DT21639-RG;
jcf7180002375347_pilon	maker	exon	202265	202384	.	+	.	ID=DT21639-RE:exon:3585;Parent=DT21639-RE,DT21639-RA,DT21639-RC,DT21639-RB,DT21639-RD,DT21639-RF,DT21639-RG;
jcf7180002375347_pilon	maker	exon	202472	202507	.	+	.	ID=DT21639-RE:exon:3586;Parent=DT21639-RE,DT21639-RA,DT21639-RC,DT21639-RB,DT21639-RD,DT21639-RF,DT21639-RG;
jcf7180002375347_pilon	maker	exon	202590	202637	.	+	.	ID=DT21639-RE:exon:3587;Parent=DT21639-RE,DT21639-RC,DT21639-RB,DT21639-RD,DT21639-RF,DT21639-RG;
jcf7180002375347_pilon	maker	exon	202804	202841	.	+	.	ID=DT21639-RE:exon:3588;Parent=DT21639-RE,DT21639-RC,DT21639-RD;
jcf7180002375347_pilon	maker	exon	205880	208214	.	+	.	ID=DT21639-RE:exon:3589;Parent=DT21639-RE,DT21639-RA,DT21639-RC,DT21639-RB,DT21639-RD,DT21639-RF,DT21639-RG;
jcf7180002375347_pilon	maker	exon	202590	202841	.	+	.	ID=DT21639-RA:exon:3590;Parent=DT21639-RA;
jcf7180002375347_pilon	maker	exon	198184	198492	.	+	.	ID=DT21639-RC:exon:3591;Parent=DT21639-RC,DT21639-RF;
jcf7180002375347_pilon	maker	exon	197124	197251	.	+	.	ID=DT21639-RD:exon:3592;Parent=DT21639-RD,DT21639-RG;
jcf7180002375347_pilon	maker	exon	4540	4655	.	+	.	ID=DT21635-RC:exon:3593;Parent=DT21635-RC,DT21635-RD,DT21635-RB,DT21635-RA;
jcf7180002375347_pilon	maker	exon	5168	5494	.	+	.	ID=DT21635-RC:exon:3594;Parent=DT21635-RC,DT21635-RD,DT21635-RB,DT21635-RA;
jcf7180002375347_pilon	maker	exon	5764	5921	.	+	.	ID=DT21635-RC:exon:3595;Parent=DT21635-RC,DT21635-RD,DT21635-RB,DT21635-RA;
jcf7180002375347_pilon	maker	exon	7511	7612	.	+	.	ID=DT21635-RC:exon:3596;Parent=DT21635-RC,DT21635-RD,DT21635-RB,DT21635-RA;
jcf7180002375347_pilon	maker	exon	7736	7846	.	+	.	ID=DT21635-RC:exon:3597;Parent=DT21635-RC,DT21635-RD,DT21635-RB,DT21635-RA;
jcf7180002375347_pilon	maker	exon	8147	8344	.	+	.	ID=DT21635-RC:exon:3598;Parent=DT21635-RC,DT21635-RD,DT21635-RB,DT21635-RA;
jcf7180002375347_pilon	maker	exon	15508	15684	.	+	.	ID=DT21635-RC:exon:3599;Parent=DT21635-RC,DT21635-RD,DT21635-RB,DT21635-RA;
jcf7180002375347_pilon	maker	exon	15797	15849	.	+	.	ID=DT21635-RC:exon:3600;Parent=DT21635-RC,DT21635-RD,DT21635-RB,DT21635-RA;
jcf7180002375347_pilon	maker	exon	18194	18359	.	+	.	ID=DT21635-RC:exon:3601;Parent=DT21635-RC,DT21635-RD,DT21635-RB,DT21635-RA;
jcf7180002375347_pilon	maker	exon	18738	18902	.	+	.	ID=DT21635-RC:exon:3602;Parent=DT21635-RC,DT21635-RD,DT21635-RB,DT21635-RA;
jcf7180002375347_pilon	maker	exon	23848	23969	.	+	.	ID=DT21635-RC:exon:3603;Parent=DT21635-RC,DT21635-RD,DT21635-RB,DT21635-RA;
jcf7180002375347_pilon	maker	exon	24093	24364	.	+	.	ID=DT21635-RC:exon:3604;Parent=DT21635-RC,DT21635-RA;
jcf7180002375347_pilon	maker	exon	26466	26525	.	+	.	ID=DT21635-RC:exon:3605;Parent=DT21635-RC,DT21635-RD,DT21635-RB,DT21635-RA;
jcf7180002375347_pilon	maker	exon	30776	31109	.	+	.	ID=DT21635-RC:exon:3606;Parent=DT21635-RC,DT21635-RD,DT21635-RB,DT21635-RA;
jcf7180002375347_pilon	maker	exon	31187	31270	.	+	.	ID=DT21635-RC:exon:3607;Parent=DT21635-RC,DT21635-RD,DT21635-RB,DT21635-RA;
jcf7180002375347_pilon	maker	exon	31353	31456	.	+	.	ID=DT21635-RC:exon:3608;Parent=DT21635-RC,DT21635-RD,DT21635-RA;
jcf7180002375347_pilon	maker	exon	32645	32780	.	+	.	ID=DT21635-RC:exon:3609;Parent=DT21635-RC,DT21635-RD,DT21635-RA;
jcf7180002375347_pilon	maker	exon	55070	55121	.	+	.	ID=DT21635-RC:exon:3610;Parent=DT21635-RC,DT21635-RD;
jcf7180002375347_pilon	maker	exon	67417	69015	.	+	.	ID=DT21635-RC:exon:3611;Parent=DT21635-RC,DT21635-RD,DT21635-RB;
jcf7180002375347_pilon	maker	exon	24126	24364	.	+	.	ID=DT21635-RD:exon:3612;Parent=DT21635-RD,DT21635-RB;
jcf7180002375347_pilon	maker	exon	31353	31485	.	+	.	ID=DT21635-RB:exon:3613;Parent=DT21635-RB;
jcf7180002375347_pilon	maker	exon	31871	31987	.	+	.	ID=DT21635-RB:exon:3614;Parent=DT21635-RB;
jcf7180002375347_pilon	maker	exon	67479	68244	.	+	.	ID=DT21635-RA:exon:3615;Parent=DT21635-RA;
jcf7180002375347_pilon	maker	exon	125313	125437	.	-	.	ID=DT21637-RB:exon:3649;Parent=DT21637-RB;
jcf7180002375347_pilon	maker	exon	111716	112069	.	-	.	ID=DT21637-RC:exon:3648;Parent=DT21637-RC,DT21637-RB;
jcf7180002375347_pilon	maker	exon	147795	148101	.	-	.	ID=DT21637-RA:exon:3647;Parent=DT21637-RA,DT21637-RC,DT21637-RB;
jcf7180002375347_pilon	maker	exon	144706	144864	.	-	.	ID=DT21637-RA:exon:3646;Parent=DT21637-RA,DT21637-RC,DT21637-RB;
jcf7180002375347_pilon	maker	exon	143273	143359	.	-	.	ID=DT21637-RA:exon:3645;Parent=DT21637-RA,DT21637-RC,DT21637-RB;
jcf7180002375347_pilon	maker	exon	143042	143190	.	-	.	ID=DT21637-RA:exon:3644;Parent=DT21637-RA,DT21637-RC,DT21637-RB;
jcf7180002375347_pilon	maker	exon	142846	142963	.	-	.	ID=DT21637-RA:exon:3643;Parent=DT21637-RA,DT21637-RC,DT21637-RB;
jcf7180002375347_pilon	maker	exon	138670	138718	.	-	.	ID=DT21637-RA:exon:3642;Parent=DT21637-RA,DT21637-RC,DT21637-RB;
jcf7180002375347_pilon	maker	exon	138445	138489	.	-	.	ID=DT21637-RA:exon:3641;Parent=DT21637-RA,DT21637-RC,DT21637-RB;
jcf7180002375347_pilon	maker	exon	132834	132893	.	-	.	ID=DT21637-RA:exon:3640;Parent=DT21637-RA,DT21637-RC,DT21637-RB;
jcf7180002375347_pilon	maker	exon	128501	128664	.	-	.	ID=DT21637-RA:exon:3639;Parent=DT21637-RA,DT21637-RC,DT21637-RB;
jcf7180002375347_pilon	maker	exon	127984	128116	.	-	.	ID=DT21637-RA:exon:3638;Parent=DT21637-RA,DT21637-RC,DT21637-RB;
jcf7180002375347_pilon	maker	exon	125575	125626	.	-	.	ID=DT21637-RA:exon:3637;Parent=DT21637-RA,DT21637-RC;
jcf7180002375347_pilon	maker	exon	125313	125487	.	-	.	ID=DT21637-RA:exon:3636;Parent=DT21637-RA,DT21637-RC;
jcf7180002375347_pilon	maker	exon	122745	122850	.	-	.	ID=DT21637-RA:exon:3635;Parent=DT21637-RA,DT21637-RC,DT21637-RB;
jcf7180002375347_pilon	maker	exon	121628	121794	.	-	.	ID=DT21637-RA:exon:3634;Parent=DT21637-RA,DT21637-RC,DT21637-RB;
jcf7180002375347_pilon	maker	exon	117039	117204	.	-	.	ID=DT21637-RA:exon:3633;Parent=DT21637-RA,DT21637-RC,DT21637-RB;
jcf7180002375347_pilon	maker	exon	116626	116732	.	-	.	ID=DT21637-RA:exon:3632;Parent=DT21637-RA,DT21637-RC,DT21637-RB;
jcf7180002375347_pilon	maker	exon	116502	116531	.	-	.	ID=DT21637-RA:exon:3631;Parent=DT21637-RA,DT21637-RC,DT21637-RB;
jcf7180002375347_pilon	maker	exon	116285	116424	.	-	.	ID=DT21637-RA:exon:3630;Parent=DT21637-RA,DT21637-RC,DT21637-RB;
jcf7180002375347_pilon	maker	exon	114644	114709	.	-	.	ID=DT21637-RA:exon:3629;Parent=DT21637-RA,DT21637-RC,DT21637-RB;
jcf7180002375347_pilon	maker	exon	114101	114260	.	-	.	ID=DT21637-RA:exon:3628;Parent=DT21637-RA,DT21637-RC,DT21637-RB;
jcf7180002375347_pilon	maker	exon	112766	112822	.	-	.	ID=DT21637-RA:exon:3627;Parent=DT21637-RA,DT21637-RC,DT21637-RB;
jcf7180002375347_pilon	maker	exon	112504	112692	.	-	.	ID=DT21637-RA:exon:3626;Parent=DT21637-RA,DT21637-RC,DT21637-RB;
jcf7180002375347_pilon	maker	exon	111716	112033	.	-	.	ID=DT21637-RA:exon:3625;Parent=DT21637-RA;
jcf7180002375347_pilon	maker	exon	108939	109073	.	-	.	ID=DT21637-RA:exon:3624;Parent=DT21637-RA,DT21637-RC,DT21637-RB;
jcf7180002375347_pilon	maker	exon	108681	108848	.	-	.	ID=DT21637-RA:exon:3623;Parent=DT21637-RA,DT21637-RC,DT21637-RB;
jcf7180002375347_pilon	maker	exon	108379	108467	.	-	.	ID=DT21637-RA:exon:3622;Parent=DT21637-RA,DT21637-RC,DT21637-RB;
jcf7180002375347_pilon	maker	exon	107347	107542	.	-	.	ID=DT21637-RA:exon:3621;Parent=DT21637-RA,DT21637-RC,DT21637-RB;
jcf7180002375347_pilon	maker	exon	107111	107250	.	-	.	ID=DT21637-RA:exon:3620;Parent=DT21637-RA,DT21637-RC,DT21637-RB;
jcf7180002375347_pilon	maker	exon	103182	103341	.	-	.	ID=DT21637-RA:exon:3619;Parent=DT21637-RA,DT21637-RC,DT21637-RB;
jcf7180002375347_pilon	maker	exon	101375	101511	.	-	.	ID=DT21637-RA:exon:3618;Parent=DT21637-RA,DT21637-RC,DT21637-RB;
jcf7180002375347_pilon	maker	exon	99327	99513	.	-	.	ID=DT21637-RA:exon:3617;Parent=DT21637-RA,DT21637-RC,DT21637-RB;
jcf7180002375347_pilon	maker	exon	96616	96701	.	-	.	ID=DT21637-RA:exon:3616;Parent=DT21637-RA,DT21637-RC,DT21637-RB;
jcf7180002375347_pilon	maker	exon	3292	3366	.	-	.	ID=DT21634-RA:exon:3650;Parent=DT21634-RA;
jcf7180002351157_pilon	maker	exon	1004	1069	.	-	.	ID=DT35341-RA:exon:115;Parent=DT35341-RA;
jcf7180002351157_pilon	maker	exon	828	905	.	-	.	ID=DT35341-RA:exon:114;Parent=DT35341-RA;
jcf7180002374547_pilon	maker	exon	10202	10406	.	-	.	ID=DT32943-RA:exon:583;Parent=DT32943-RA;
jcf7180002374547_pilon	maker	exon	6659	8013	.	-	.	ID=DT32943-RA:exon:582;Parent=DT32943-RA;
jcf7180002374547_pilon	maker	exon	14523	14897	.	-	.	ID=DT32944-RA:exon:588;Parent=DT32944-RA;
jcf7180002374547_pilon	maker	exon	16459	16539	.	-	.	ID=DT32944-RA:exon:587;Parent=DT32944-RA;
jcf7180002374547_pilon	maker	exon	18348	18385	.	-	.	ID=DT32944-RA:exon:586;Parent=DT32944-RA;
jcf7180002374547_pilon	maker	exon	18501	18805	.	-	.	ID=DT32944-RA:exon:585;Parent=DT32944-RA;
jcf7180002374547_pilon	maker	exon	18827	18870	.	-	.	ID=DT32944-RA:exon:584;Parent=DT32944-RA;
jcf7180002375238_pilon	maker	exon	17060	17302	.	-	.	ID=DT33904-RA:exon:2127;Parent=DT33904-RA;
jcf7180002375238_pilon	maker	exon	14992	15083	.	-	.	ID=DT33904-RA:exon:2126;Parent=DT33904-RA;
jcf7180002375238_pilon	maker	exon	14672	14918	.	-	.	ID=DT33904-RA:exon:2125;Parent=DT33904-RA;
jcf7180002375238_pilon	maker	exon	14461	14599	.	-	.	ID=DT33904-RA:exon:2124;Parent=DT33904-RA;
jcf7180002375238_pilon	maker	exon	13170	13343	.	-	.	ID=DT33904-RA:exon:2123;Parent=DT33904-RA;
jcf7180002375238_pilon	maker	exon	12972	13085	.	-	.	ID=DT33904-RA:exon:2122;Parent=DT33904-RA;
jcf7180002375238_pilon	maker	exon	12775	12897	.	-	.	ID=DT33904-RA:exon:2121;Parent=DT33904-RA;
jcf7180002375238_pilon	maker	exon	12592	12711	.	-	.	ID=DT33904-RA:exon:2120;Parent=DT33904-RA;
jcf7180002375238_pilon	maker	exon	12376	12501	.	-	.	ID=DT33904-RA:exon:2119;Parent=DT33904-RA;
jcf7180002375238_pilon	maker	exon	11111	11221	.	-	.	ID=DT33904-RA:exon:2118;Parent=DT33904-RA;
jcf7180002375238_pilon	maker	exon	10906	11037	.	-	.	ID=DT33904-RA:exon:2117;Parent=DT33904-RA;
jcf7180002375238_pilon	maker	exon	10563	10694	.	-	.	ID=DT33904-RA:exon:2116;Parent=DT33904-RA;
jcf7180002375238_pilon	maker	exon	10002	10136	.	-	.	ID=DT33904-RA:exon:2115;Parent=DT33904-RA;
jcf7180002375238_pilon	maker	exon	9764	9916	.	-	.	ID=DT33904-RA:exon:2114;Parent=DT33904-RA;
jcf7180002375238_pilon	maker	exon	8254	8409	.	-	.	ID=DT33904-RA:exon:2113;Parent=DT33904-RA;
jcf7180002375238_pilon	maker	exon	8048	8176	.	-	.	ID=DT33904-RA:exon:2112;Parent=DT33904-RA;
jcf7180002375238_pilon	maker	exon	7834	7960	.	-	.	ID=DT33904-RA:exon:2111;Parent=DT33904-RA;
jcf7180002375238_pilon	maker	exon	6621	6790	.	-	.	ID=DT33904-RA:exon:2110;Parent=DT33904-RA;
jcf7180002375238_pilon	maker	exon	6487	6542	.	-	.	ID=DT33904-RA:exon:2109;Parent=DT33904-RA;
jcf7180002375238_pilon	maker	exon	3292	3435	.	-	.	ID=DT33904-RA:exon:2108;Parent=DT33904-RA;
jcf7180002375238_pilon	maker	exon	3144	3210	.	-	.	ID=DT33904-RA:exon:2107;Parent=DT33904-RA;
jcf7180002375238_pilon	maker	exon	1074	1258	.	-	.	ID=DT33904-RA:exon:2106;Parent=DT33904-RA;
jcf7180002375430_pilon	maker	exon	66411	69373	.	-	.	ID=DT30887-RA:exon:2474;Parent=DT30887-RA;
jcf7180002375430_pilon	maker	exon	69447	69743	.	-	.	ID=DT30887-RA:exon:2473;Parent=DT30887-RA;
jcf7180002375430_pilon	maker	exon	69832	70091	.	-	.	ID=DT30887-RA:exon:2472;Parent=DT30887-RA;
jcf7180002375430_pilon	maker	exon	70353	70407	.	-	.	ID=DT30887-RA:exon:2471;Parent=DT30887-RA;
jcf7180002375430_pilon	maker	exon	8587	8796	.	-	.	ID=DT30885-RA:exon:2476;Parent=DT30885-RA;
jcf7180002375430_pilon	maker	exon	8327	8497	.	-	.	ID=DT30885-RA:exon:2475;Parent=DT30885-RA;
jcf7180002375430_pilon	maker	exon	15980	16069	.	-	.	ID=DT30886-RA:exon:2479;Parent=DT30886-RA;
jcf7180002375430_pilon	maker	exon	15389	15527	.	-	.	ID=DT30886-RA:exon:2478;Parent=DT30886-RA;
jcf7180002375430_pilon	maker	exon	14090	14211	.	-	.	ID=DT30886-RA:exon:2477;Parent=DT30886-RA;
jcf7180002375913_pilon	maker	exon	18786	18945	.	+	.	ID=DT30242-RA:exon:2820;Parent=DT30242-RA;
jcf7180002375913_pilon	maker	exon	20479	20571	.	+	.	ID=DT30242-RA:exon:2821;Parent=DT30242-RA;
jcf7180002375913_pilon	maker	exon	20653	20719	.	+	.	ID=DT30242-RA:exon:2822;Parent=DT30242-RA;
jcf7180002375913_pilon	maker	exon	23036	23228	.	+	.	ID=DT30242-RA:exon:2823;Parent=DT30242-RA;
jcf7180002375913_pilon	maker	exon	25918	26098	.	+	.	ID=DT30242-RA:exon:2824;Parent=DT30242-RA;
jcf7180002375913_pilon	maker	exon	26210	26324	.	+	.	ID=DT30242-RA:exon:2825;Parent=DT30242-RA;
jcf7180002375913_pilon	maker	exon	27377	27792	.	+	.	ID=DT30242-RA:exon:2826;Parent=DT30242-RA;
jcf7180002375913_pilon	maker	exon	31501	31643	.	+	.	ID=DT30242-RA:exon:2827;Parent=DT30242-RA;
jcf7180002375913_pilon	maker	exon	31716	31888	.	+	.	ID=DT30242-RA:exon:2828;Parent=DT30242-RA;
jcf7180002375913_pilon	maker	exon	34606	34825	.	+	.	ID=DT30242-RA:exon:2829;Parent=DT30242-RA;
jcf7180002375913_pilon	maker	exon	35651	36386	.	+	.	ID=DT30242-RA:exon:2830;Parent=DT30242-RA;
jcf7180002375913_pilon	maker	exon	3269	3452	.	+	.	ID=DT30241-RA:exon:2831;Parent=DT30241-RA;
jcf7180002375913_pilon	maker	exon	4006	4212	.	+	.	ID=DT30241-RA:exon:2832;Parent=DT30241-RA;
jcf7180002375913_pilon	maker	exon	6813	6944	.	+	.	ID=DT30241-RA:exon:2833;Parent=DT30241-RA;
jcf7180002375913_pilon	maker	exon	7264	7341	.	+	.	ID=DT30241-RA:exon:2834;Parent=DT30241-RA;
jcf7180002375913_pilon	maker	exon	16196	16248	.	+	.	ID=DT30241-RA:exon:2835;Parent=DT30241-RA;
jcf7180002375913_pilon	maker	exon	16854	16967	.	+	.	ID=DT30241-RA:exon:2836;Parent=DT30241-RA;
jcf7180002375913_pilon	maker	exon	17066	17149	.	+	.	ID=DT30241-RA:exon:2837;Parent=DT30241-RA;
jcf7180002375913_pilon	maker	exon	59922	60090	.	-	.	ID=DT30244-RC:exon:2853;Parent=DT30244-RC;
jcf7180002375913_pilon	maker	exon	65001	65179	.	-	.	ID=DT30244-RA:exon:2852;Parent=DT30244-RA;
jcf7180002375913_pilon	maker	exon	49848	50346	.	-	.	ID=DT30244-RB:exon:2851;Parent=DT30244-RB,DT30244-RA;
jcf7180002375913_pilon	maker	exon	53819	54101	.	-	.	ID=DT30244-RB:exon:2850;Parent=DT30244-RB,DT30244-RA;
jcf7180002375913_pilon	maker	exon	55621	55733	.	-	.	ID=DT30244-RB:exon:2849;Parent=DT30244-RB,DT30244-RA;
jcf7180002375913_pilon	maker	exon	55878	55935	.	-	.	ID=DT30244-RB:exon:2848;Parent=DT30244-RB,DT30244-RA;
jcf7180002375913_pilon	maker	exon	57792	57936	.	-	.	ID=DT30244-RB:exon:2847;Parent=DT30244-RB,DT30244-RA;
jcf7180002375913_pilon	maker	exon	58005	58265	.	-	.	ID=DT30244-RB:exon:2846;Parent=DT30244-RB,DT30244-RA;
jcf7180002375913_pilon	maker	exon	59947	60090	.	-	.	ID=DT30244-RB:exon:2845;Parent=DT30244-RB,DT30244-RA;
jcf7180002375913_pilon	maker	exon	60161	60281	.	-	.	ID=DT30244-RB:exon:2844;Parent=DT30244-RB,DT30244-RA,DT30244-RC;
jcf7180002375913_pilon	maker	exon	63087	63276	.	-	.	ID=DT30244-RB:exon:2843;Parent=DT30244-RB,DT30244-RA,DT30244-RC;
jcf7180002375913_pilon	maker	exon	65001	65082	.	-	.	ID=DT30244-RB:exon:2842;Parent=DT30244-RB,DT30244-RC;
jcf7180002375913_pilon	maker	exon	65156	65261	.	-	.	ID=DT30244-RB:exon:2841;Parent=DT30244-RB,DT30244-RC;
jcf7180002375913_pilon	maker	exon	65698	65803	.	-	.	ID=DT30244-RB:exon:2840;Parent=DT30244-RB,DT30244-RC;
jcf7180002375913_pilon	maker	exon	66790	66939	.	-	.	ID=DT30244-RB:exon:2839;Parent=DT30244-RB,DT30244-RC;
jcf7180002375913_pilon	maker	exon	69706	70131	.	-	.	ID=DT30244-RB:exon:2838;Parent=DT30244-RB,DT30244-RC;
jcf7180002375913_pilon	maker	exon	38721	39616	.	-	.	ID=DT30243-RA:exon:2860;Parent=DT30243-RA;
jcf7180002375913_pilon	maker	exon	39692	39949	.	-	.	ID=DT30243-RA:exon:2859;Parent=DT30243-RA;
jcf7180002375913_pilon	maker	exon	40017	40307	.	-	.	ID=DT30243-RA:exon:2858;Parent=DT30243-RA;
jcf7180002375913_pilon	maker	exon	40403	40705	.	-	.	ID=DT30243-RA:exon:2857;Parent=DT30243-RA;
jcf7180002375913_pilon	maker	exon	40789	41094	.	-	.	ID=DT30243-RA:exon:2856;Parent=DT30243-RA;
jcf7180002375913_pilon	maker	exon	42982	43018	.	-	.	ID=DT30243-RA:exon:2855;Parent=DT30243-RA;
jcf7180002375913_pilon	maker	exon	46601	46696	.	-	.	ID=DT30243-RA:exon:2854;Parent=DT30243-RA;
jcf7180002374838_pilon	maker	exon	61999	62046	.	+	.	ID=DT30268-RA:exon:1531;Parent=DT30268-RA;
jcf7180002374838_pilon	maker	exon	62161	62203	.	+	.	ID=DT30268-RA:exon:1532;Parent=DT30268-RA;
jcf7180002374838_pilon	maker	exon	62300	62359	.	+	.	ID=DT30268-RA:exon:1533;Parent=DT30268-RA;
jcf7180002374838_pilon	maker	exon	62472	62621	.	+	.	ID=DT30268-RA:exon:1534;Parent=DT30268-RA;
jcf7180002374838_pilon	maker	exon	62698	62815	.	+	.	ID=DT30268-RA:exon:1535;Parent=DT30268-RA;
jcf7180002374838_pilon	maker	exon	65493	65671	.	+	.	ID=DT30268-RA:exon:1536;Parent=DT30268-RA;
jcf7180002374838_pilon	maker	exon	65751	65832	.	+	.	ID=DT30268-RA:exon:1537;Parent=DT30268-RA;
jcf7180002374838_pilon	maker	exon	65910	66131	.	+	.	ID=DT30268-RA:exon:1538;Parent=DT30268-RA;
jcf7180002374838_pilon	maker	exon	7857	8074	.	+	.	ID=DT30265-RA:exon:1539;Parent=DT30265-RA;
jcf7180002374838_pilon	maker	exon	9020	9170	.	+	.	ID=DT30265-RA:exon:1540;Parent=DT30265-RA;
jcf7180002374838_pilon	maker	exon	11573	11633	.	+	.	ID=DT30265-RA:exon:1541;Parent=DT30265-RA;
jcf7180002374838_pilon	maker	exon	11701	11795	.	+	.	ID=DT30265-RA:exon:1542;Parent=DT30265-RA;
jcf7180002374838_pilon	maker	exon	12880	13015	.	+	.	ID=DT30265-RA:exon:1543;Parent=DT30265-RA;
jcf7180002374838_pilon	maker	exon	19141	19199	.	+	.	ID=DT30265-RA:exon:1544;Parent=DT30265-RA;
jcf7180002374838_pilon	maker	exon	19263	19384	.	+	.	ID=DT30265-RA:exon:1545;Parent=DT30265-RA;
jcf7180002374838_pilon	maker	exon	19462	19502	.	+	.	ID=DT30265-RA:exon:1546;Parent=DT30265-RA;
jcf7180002374838_pilon	maker	exon	19593	19711	.	+	.	ID=DT30265-RA:exon:1547;Parent=DT30265-RA;
jcf7180002374838_pilon	maker	exon	22084	22158	.	+	.	ID=DT30265-RA:exon:1548;Parent=DT30265-RA;
jcf7180002374838_pilon	maker	exon	22220	22309	.	+	.	ID=DT30265-RA:exon:1549;Parent=DT30265-RA;
jcf7180002374838_pilon	maker	exon	22416	22529	.	+	.	ID=DT30265-RA:exon:1550;Parent=DT30265-RA;
jcf7180002374838_pilon	maker	exon	24523	24621	.	+	.	ID=DT30265-RA:exon:1551;Parent=DT30265-RA;
jcf7180002374838_pilon	maker	exon	24728	24934	.	+	.	ID=DT30265-RA:exon:1552;Parent=DT30265-RA;
jcf7180002374838_pilon	maker	exon	27113	27583	.	+	.	ID=DT30265-RA:exon:1553;Parent=DT30265-RA;
jcf7180002374838_pilon	maker	exon	76362	76551	.	+	.	ID=DT30269-RA:exon:1554;Parent=DT30269-RA,DT30269-RB;
jcf7180002374838_pilon	maker	exon	76921	77076	.	+	.	ID=DT30269-RA:exon:1555;Parent=DT30269-RA;
jcf7180002374838_pilon	maker	exon	77182	77222	.	+	.	ID=DT30269-RA:exon:1556;Parent=DT30269-RA;
jcf7180002374838_pilon	maker	exon	77696	77912	.	+	.	ID=DT30269-RA:exon:1557;Parent=DT30269-RA;
jcf7180002374838_pilon	maker	exon	78025	78113	.	+	.	ID=DT30269-RA:exon:1558;Parent=DT30269-RA,DT30269-RB;
jcf7180002374838_pilon	maker	exon	78214	78264	.	+	.	ID=DT30269-RA:exon:1559;Parent=DT30269-RA,DT30269-RB;
jcf7180002374838_pilon	maker	exon	79389	79703	.	+	.	ID=DT30269-RA:exon:1560;Parent=DT30269-RA,DT30269-RB;
jcf7180002374838_pilon	maker	exon	79783	79852	.	+	.	ID=DT30269-RA:exon:1561;Parent=DT30269-RA,DT30269-RB;
jcf7180002374838_pilon	maker	exon	80131	80307	.	+	.	ID=DT30269-RA:exon:1562;Parent=DT30269-RA,DT30269-RB;
jcf7180002374838_pilon	maker	exon	80479	80594	.	+	.	ID=DT30269-RA:exon:1563;Parent=DT30269-RA,DT30269-RB;
jcf7180002374838_pilon	maker	exon	80955	81021	.	+	.	ID=DT30269-RA:exon:1564;Parent=DT30269-RA,DT30269-RB;
jcf7180002374838_pilon	maker	exon	81108	81196	.	+	.	ID=DT30269-RA:exon:1565;Parent=DT30269-RA,DT30269-RB;
jcf7180002374838_pilon	maker	exon	76921	77055	.	+	.	ID=DT30269-RB:exon:1566;Parent=DT30269-RB;
jcf7180002374838_pilon	maker	exon	33624	34144	.	-	.	ID=DT30266-RA:exon:1585;Parent=DT30266-RA;
jcf7180002374838_pilon	maker	exon	34165	34610	.	-	.	ID=DT30266-RA:exon:1584;Parent=DT30266-RA;
jcf7180002374838_pilon	maker	exon	34677	34747	.	-	.	ID=DT30266-RA:exon:1583;Parent=DT30266-RA;
jcf7180002374838_pilon	maker	exon	34817	34984	.	-	.	ID=DT30266-RA:exon:1582;Parent=DT30266-RA;
jcf7180002374838_pilon	maker	exon	37923	38034	.	-	.	ID=DT30266-RA:exon:1581;Parent=DT30266-RA;
jcf7180002374838_pilon	maker	exon	38129	38396	.	-	.	ID=DT30266-RA:exon:1580;Parent=DT30266-RA;
jcf7180002374838_pilon	maker	exon	41306	41446	.	-	.	ID=DT30266-RA:exon:1579;Parent=DT30266-RA;
jcf7180002374838_pilon	maker	exon	41533	41637	.	-	.	ID=DT30266-RA:exon:1578;Parent=DT30266-RA;
jcf7180002374838_pilon	maker	exon	43150	43254	.	-	.	ID=DT30266-RA:exon:1577;Parent=DT30266-RA;
jcf7180002374838_pilon	maker	exon	43337	43559	.	-	.	ID=DT30266-RA:exon:1576;Parent=DT30266-RA;
jcf7180002374838_pilon	maker	exon	45196	45315	.	-	.	ID=DT30266-RA:exon:1575;Parent=DT30266-RA;
jcf7180002374838_pilon	maker	exon	45441	45594	.	-	.	ID=DT30266-RA:exon:1574;Parent=DT30266-RA;
jcf7180002374838_pilon	maker	exon	45670	45839	.	-	.	ID=DT30266-RA:exon:1573;Parent=DT30266-RA;
jcf7180002374838_pilon	maker	exon	47263	47462	.	-	.	ID=DT30266-RA:exon:1572;Parent=DT30266-RA;
jcf7180002374838_pilon	maker	exon	47538	47640	.	-	.	ID=DT30266-RA:exon:1571;Parent=DT30266-RA;
jcf7180002374838_pilon	maker	exon	47711	47811	.	-	.	ID=DT30266-RA:exon:1570;Parent=DT30266-RA;
jcf7180002374838_pilon	maker	exon	51058	51156	.	-	.	ID=DT30266-RA:exon:1569;Parent=DT30266-RA;
jcf7180002374838_pilon	maker	exon	51229	51388	.	-	.	ID=DT30266-RA:exon:1568;Parent=DT30266-RA;
jcf7180002374838_pilon	maker	exon	52902	53032	.	-	.	ID=DT30266-RA:exon:1567;Parent=DT30266-RA;
jcf7180002374838_pilon	maker	exon	60532	60579	.	-	.	ID=DT30267-RA:exon:1589;Parent=DT30267-RA;
jcf7180002374838_pilon	maker	exon	60361	60449	.	-	.	ID=DT30267-RA:exon:1588;Parent=DT30267-RA;
jcf7180002374838_pilon	maker	exon	58819	58962	.	-	.	ID=DT30267-RA:exon:1587;Parent=DT30267-RA;
jcf7180002374838_pilon	maker	exon	58424	58598	.	-	.	ID=DT30267-RA:exon:1586;Parent=DT30267-RA;
jcf7180002374838_pilon	maker	exon	76402	76512	.	-	.	ID=DT30270-RA:exon:1591;Parent=DT30270-RA;
jcf7180002374838_pilon	maker	exon	77017	77235	.	-	.	ID=DT30270-RA:exon:1590;Parent=DT30270-RA;
jcf7180002376524_pilon	maker	exon	3316	3389	.	+	.	ID=DT33030-RA:exon:5268;Parent=DT33030-RA;
jcf7180002376524_pilon	maker	exon	3562	3598	.	+	.	ID=DT33031-RA:exon:5269;Parent=DT33031-RA;
jcf7180002376524_pilon	maker	exon	3616	3650	.	+	.	ID=DT33031-RA:exon:5270;Parent=DT33031-RA;
jcf7180002376524_pilon	maker	exon	3752	3825	.	+	.	ID=DT33032-RA:exon:5271;Parent=DT33032-RA;
jcf7180002376524_pilon	maker	exon	3955	4028	.	+	.	ID=DT33033-RA:exon:5272;Parent=DT33033-RA;
jcf7180002376524_pilon	maker	exon	4202	4238	.	+	.	ID=DT33034-RA:exon:5273;Parent=DT33034-RA;
jcf7180002376524_pilon	maker	exon	4255	4290	.	+	.	ID=DT33034-RA:exon:5274;Parent=DT33034-RA;
jcf7180002376524_pilon	maker	exon	4392	4465	.	+	.	ID=DT33035-RA:exon:5275;Parent=DT33035-RA;
jcf7180002376524_pilon	maker	exon	4595	4668	.	+	.	ID=DT33036-RA:exon:5276;Parent=DT33036-RA;
jcf7180002376524_pilon	maker	exon	4842	4878	.	+	.	ID=DT33037-RA:exon:5277;Parent=DT33037-RA;
jcf7180002376524_pilon	maker	exon	4895	4930	.	+	.	ID=DT33037-RA:exon:5278;Parent=DT33037-RA;
jcf7180002376524_pilon	maker	exon	5236	5309	.	+	.	ID=DT33038-RA:exon:5279;Parent=DT33038-RA;
jcf7180002376524_pilon	maker	exon	5483	5519	.	+	.	ID=DT33039-RA:exon:5280;Parent=DT33039-RA;
jcf7180002376524_pilon	maker	exon	5536	5571	.	+	.	ID=DT33039-RA:exon:5281;Parent=DT33039-RA;
jcf7180002376524_pilon	maker	exon	5673	5746	.	+	.	ID=DT33040-RA:exon:5282;Parent=DT33040-RA;
jcf7180002376524_pilon	maker	exon	5921	5957	.	+	.	ID=DT33041-RA:exon:5283;Parent=DT33041-RA;
jcf7180002376524_pilon	maker	exon	5974	6009	.	+	.	ID=DT33041-RA:exon:5284;Parent=DT33041-RA;
jcf7180002376524_pilon	maker	exon	6111	6184	.	+	.	ID=DT33042-RA:exon:5285;Parent=DT33042-RA;
jcf7180002376524_pilon	maker	exon	6313	6386	.	+	.	ID=DT33043-RA:exon:5286;Parent=DT33043-RA;
jcf7180002376524_pilon	maker	exon	6560	6596	.	+	.	ID=DT33044-RA:exon:5287;Parent=DT33044-RA;
jcf7180002376524_pilon	maker	exon	6613	6648	.	+	.	ID=DT33044-RA:exon:5288;Parent=DT33044-RA;
jcf7180002376524_pilon	maker	exon	6750	6823	.	+	.	ID=DT33045-RA:exon:5289;Parent=DT33045-RA;
jcf7180002376524_pilon	maker	exon	6953	7026	.	+	.	ID=DT33046-RA:exon:5290;Parent=DT33046-RA;
jcf7180002376524_pilon	maker	exon	7156	7229	.	+	.	ID=DT33047-RA:exon:5291;Parent=DT33047-RA;
jcf7180002376524_pilon	maker	exon	7403	7439	.	+	.	ID=DT33048-RA:exon:5292;Parent=DT33048-RA;
jcf7180002376524_pilon	maker	exon	7456	7491	.	+	.	ID=DT33048-RA:exon:5293;Parent=DT33048-RA;
jcf7180002376524_pilon	maker	exon	7797	7870	.	+	.	ID=DT33049-RA:exon:5294;Parent=DT33049-RA;
jcf7180002376524_pilon	maker	exon	8044	8132	.	+	.	ID=DT33050-RA:exon:5295;Parent=DT33050-RA;
jcf7180002376524_pilon	maker	exon	8234	8307	.	+	.	ID=DT33051-RA:exon:5296;Parent=DT33051-RA;
jcf7180002376524_pilon	maker	exon	8436	8509	.	+	.	ID=DT33052-RA:exon:5297;Parent=DT33052-RA;
jcf7180002376524_pilon	maker	exon	8638	8712	.	+	.	ID=DT33053-RA:exon:5298;Parent=DT33053-RA;
jcf7180002376524_pilon	maker	exon	8842	8915	.	+	.	ID=DT33054-RA:exon:5299;Parent=DT33054-RA;
jcf7180002376524_pilon	maker	exon	9088	9124	.	+	.	ID=DT33055-RA:exon:5300;Parent=DT33055-RA;
jcf7180002376524_pilon	maker	exon	9141	9176	.	+	.	ID=DT33055-RA:exon:5301;Parent=DT33055-RA;
jcf7180002376524_pilon	maker	exon	9278	9351	.	+	.	ID=DT33056-RA:exon:5302;Parent=DT33056-RA;
jcf7180002376524_pilon	maker	exon	9481	9554	.	+	.	ID=DT33057-RA:exon:5303;Parent=DT33057-RA;
jcf7180002376524_pilon	maker	exon	9728	9764	.	+	.	ID=DT33058-RA:exon:5304;Parent=DT33058-RA;
jcf7180002376524_pilon	maker	exon	9781	9816	.	+	.	ID=DT33058-RA:exon:5305;Parent=DT33058-RA;
jcf7180002376524_pilon	maker	exon	9918	9991	.	+	.	ID=DT33059-RA:exon:5306;Parent=DT33059-RA;
jcf7180002376524_pilon	maker	exon	10121	10194	.	+	.	ID=DT33060-RA:exon:5307;Parent=DT33060-RA;
jcf7180002376524_pilon	maker	exon	10368	10404	.	+	.	ID=DT33061-RA:exon:5308;Parent=DT33061-RA;
jcf7180002376524_pilon	maker	exon	10421	10456	.	+	.	ID=DT33061-RA:exon:5309;Parent=DT33061-RA;
jcf7180002376524_pilon	maker	exon	10559	10632	.	+	.	ID=DT33062-RA:exon:5310;Parent=DT33062-RA;
jcf7180002376524_pilon	maker	exon	10762	10835	.	+	.	ID=DT33063-RA:exon:5311;Parent=DT33063-RA;
jcf7180002376524_pilon	maker	exon	11009	11045	.	+	.	ID=DT33064-RA:exon:5312;Parent=DT33064-RA;
jcf7180002376524_pilon	maker	exon	11062	11097	.	+	.	ID=DT33064-RA:exon:5313;Parent=DT33064-RA;
jcf7180002376524_pilon	maker	exon	11200	11274	.	+	.	ID=DT33065-RA:exon:5314;Parent=DT33065-RA;
jcf7180002376524_pilon	maker	exon	11635	11671	.	+	.	ID=DT33066-RA:exon:5315;Parent=DT33066-RA;
jcf7180002376524_pilon	maker	exon	11688	11723	.	+	.	ID=DT33066-RA:exon:5316;Parent=DT33066-RA;
jcf7180002376524_pilon	maker	exon	11826	11899	.	+	.	ID=DT33067-RA:exon:5317;Parent=DT33067-RA;
jcf7180002376524_pilon	maker	exon	12073	12109	.	+	.	ID=DT33068-RA:exon:5318;Parent=DT33068-RA;
jcf7180002376524_pilon	maker	exon	12126	12161	.	+	.	ID=DT33068-RA:exon:5319;Parent=DT33068-RA;
jcf7180002376524_pilon	maker	exon	12263	12336	.	+	.	ID=DT33069-RA:exon:5320;Parent=DT33069-RA;
jcf7180002376524_pilon	maker	exon	12466	12539	.	+	.	ID=DT33070-RA:exon:5321;Parent=DT33070-RA;
jcf7180002376524_pilon	maker	exon	12713	12749	.	+	.	ID=DT33071-RA:exon:5322;Parent=DT33071-RA;
jcf7180002376524_pilon	maker	exon	12766	12801	.	+	.	ID=DT33071-RA:exon:5323;Parent=DT33071-RA;
jcf7180002376524_pilon	maker	exon	12903	12976	.	+	.	ID=DT33072-RA:exon:5324;Parent=DT33072-RA;
jcf7180002376524_pilon	maker	exon	13106	13179	.	+	.	ID=DT33073-RA:exon:5325;Parent=DT33073-RA;
jcf7180002376524_pilon	maker	exon	13353	13389	.	+	.	ID=DT33074-RA:exon:5326;Parent=DT33074-RA;
jcf7180002376524_pilon	maker	exon	13406	13441	.	+	.	ID=DT33074-RA:exon:5327;Parent=DT33074-RA;
jcf7180002376524_pilon	maker	exon	13544	13617	.	+	.	ID=DT33075-RA:exon:5328;Parent=DT33075-RA;
jcf7180002376524_pilon	maker	exon	13747	13820	.	+	.	ID=DT33076-RA:exon:5329;Parent=DT33076-RA;
jcf7180002376524_pilon	maker	exon	13994	14030	.	+	.	ID=DT33077-RA:exon:5330;Parent=DT33077-RA;
jcf7180002376524_pilon	maker	exon	14047	14082	.	+	.	ID=DT33077-RA:exon:5331;Parent=DT33077-RA;
jcf7180002376524_pilon	maker	exon	14185	14258	.	+	.	ID=DT33078-RA:exon:5332;Parent=DT33078-RA;
jcf7180002376524_pilon	maker	exon	14388	14461	.	+	.	ID=DT33079-RA:exon:5333;Parent=DT33079-RA;
jcf7180002376524_pilon	maker	exon	14635	14671	.	+	.	ID=DT33080-RA:exon:5334;Parent=DT33080-RA;
jcf7180002376524_pilon	maker	exon	14688	14723	.	+	.	ID=DT33080-RA:exon:5335;Parent=DT33080-RA;
jcf7180002376524_pilon	maker	exon	14825	14898	.	+	.	ID=DT33081-RA:exon:5336;Parent=DT33081-RA;
jcf7180002376524_pilon	maker	exon	15028	15101	.	+	.	ID=DT33082-RA:exon:5337;Parent=DT33082-RA;
jcf7180002376524_pilon	maker	exon	15275	15311	.	+	.	ID=DT33083-RA:exon:5338;Parent=DT33083-RA;
jcf7180002376524_pilon	maker	exon	15328	15363	.	+	.	ID=DT33083-RA:exon:5339;Parent=DT33083-RA;
jcf7180002376524_pilon	maker	exon	15466	15539	.	+	.	ID=DT33084-RA:exon:5340;Parent=DT33084-RA;
jcf7180002376524_pilon	maker	exon	15713	15749	.	+	.	ID=DT33085-RA:exon:5341;Parent=DT33085-RA;
jcf7180002376524_pilon	maker	exon	15766	15800	.	+	.	ID=DT33085-RA:exon:5342;Parent=DT33085-RA;
jcf7180002376524_pilon	maker	exon	15903	15976	.	+	.	ID=DT33086-RA:exon:5343;Parent=DT33086-RA;
jcf7180002376524_pilon	maker	exon	16105	16178	.	+	.	ID=DT33087-RA:exon:5344;Parent=DT33087-RA;
jcf7180002376524_pilon	maker	exon	16352	16388	.	+	.	ID=DT33088-RA:exon:5345;Parent=DT33088-RA;
jcf7180002376524_pilon	maker	exon	16405	16440	.	+	.	ID=DT33088-RA:exon:5346;Parent=DT33088-RA;
jcf7180002376524_pilon	maker	exon	16542	16615	.	+	.	ID=DT33089-RA:exon:5347;Parent=DT33089-RA;
jcf7180002376524_pilon	maker	exon	16789	16825	.	+	.	ID=DT33090-RA:exon:5348;Parent=DT33090-RA;
jcf7180002376524_pilon	maker	exon	16842	16878	.	+	.	ID=DT33090-RA:exon:5349;Parent=DT33090-RA;
jcf7180002376524_pilon	maker	exon	16981	17054	.	+	.	ID=DT33091-RA:exon:5350;Parent=DT33091-RA;
jcf7180002376524_pilon	maker	exon	17184	17257	.	+	.	ID=DT33092-RA:exon:5351;Parent=DT33092-RA;
jcf7180002376524_pilon	maker	exon	17431	17467	.	+	.	ID=DT33093-RA:exon:5352;Parent=DT33093-RA;
jcf7180002376524_pilon	maker	exon	17484	17520	.	+	.	ID=DT33093-RA:exon:5353;Parent=DT33093-RA;
jcf7180002376524_pilon	maker	exon	17623	17696	.	+	.	ID=DT33094-RA:exon:5354;Parent=DT33094-RA;
jcf7180002376524_pilon	maker	exon	17826	17899	.	+	.	ID=DT33095-RA:exon:5355;Parent=DT33095-RA;
jcf7180002376524_pilon	maker	exon	18073	18109	.	+	.	ID=DT33096-RA:exon:5356;Parent=DT33096-RA;
jcf7180002376524_pilon	maker	exon	18126	18161	.	+	.	ID=DT33096-RA:exon:5357;Parent=DT33096-RA;
jcf7180002376524_pilon	maker	exon	18263	18336	.	+	.	ID=DT33097-RA:exon:5358;Parent=DT33097-RA;
jcf7180002376524_pilon	maker	exon	18466	18539	.	+	.	ID=DT33098-RA:exon:5359;Parent=DT33098-RA;
jcf7180002376524_pilon	maker	exon	18668	18742	.	+	.	ID=DT33099-RA:exon:5360;Parent=DT33099-RA;
jcf7180002376524_pilon	maker	exon	18914	18950	.	+	.	ID=DT33100-RA:exon:5361;Parent=DT33100-RA;
jcf7180002376524_pilon	maker	exon	18967	19002	.	+	.	ID=DT33100-RA:exon:5362;Parent=DT33100-RA;
jcf7180002376524_pilon	maker	exon	19104	19177	.	+	.	ID=DT33101-RA:exon:5363;Parent=DT33101-RA;
jcf7180002376524_pilon	maker	exon	19308	19381	.	+	.	ID=DT33102-RA:exon:5364;Parent=DT33102-RA;
jcf7180002376524_pilon	maker	exon	19555	19591	.	+	.	ID=DT33103-RA:exon:5365;Parent=DT33103-RA;
jcf7180002376524_pilon	maker	exon	19608	19643	.	+	.	ID=DT33103-RA:exon:5366;Parent=DT33103-RA;
jcf7180002376524_pilon	maker	exon	19746	19819	.	+	.	ID=DT33104-RA:exon:5367;Parent=DT33104-RA;
jcf7180002376524_pilon	maker	exon	19948	20021	.	+	.	ID=DT33105-RA:exon:5368;Parent=DT33105-RA;
jcf7180002376524_pilon	maker	exon	20195	20231	.	+	.	ID=DT33106-RA:exon:5369;Parent=DT33106-RA;
jcf7180002376524_pilon	maker	exon	20248	20281	.	+	.	ID=DT33106-RA:exon:5370;Parent=DT33106-RA;
jcf7180002376524_pilon	maker	exon	20384	20457	.	+	.	ID=DT33107-RA:exon:5371;Parent=DT33107-RA;
jcf7180002376524_pilon	maker	exon	20587	20660	.	+	.	ID=DT33108-RA:exon:5372;Parent=DT33108-RA;
jcf7180002376524_pilon	maker	exon	20833	20869	.	+	.	ID=DT33109-RA:exon:5373;Parent=DT33109-RA;
jcf7180002376524_pilon	maker	exon	20886	20921	.	+	.	ID=DT33109-RA:exon:5374;Parent=DT33109-RA;
jcf7180002376524_pilon	maker	exon	21023	21095	.	+	.	ID=DT33110-RA:exon:5375;Parent=DT33110-RA;
jcf7180002376524_pilon	maker	exon	21226	21299	.	+	.	ID=DT33111-RA:exon:5376;Parent=DT33111-RA;
jcf7180002376524_pilon	maker	exon	21473	21509	.	+	.	ID=DT33112-RA:exon:5377;Parent=DT33112-RA;
jcf7180002376524_pilon	maker	exon	21526	21561	.	+	.	ID=DT33112-RA:exon:5378;Parent=DT33112-RA;
jcf7180002376524_pilon	maker	exon	21663	21736	.	+	.	ID=DT33113-RA:exon:5379;Parent=DT33113-RA;
jcf7180002376524_pilon	maker	exon	21866	21939	.	+	.	ID=DT33114-RA:exon:5380;Parent=DT33114-RA;
jcf7180002376524_pilon	maker	exon	22113	22149	.	+	.	ID=DT33115-RA:exon:5381;Parent=DT33115-RA;
jcf7180002376524_pilon	maker	exon	22166	22201	.	+	.	ID=DT33115-RA:exon:5382;Parent=DT33115-RA;
jcf7180002376524_pilon	maker	exon	22304	22377	.	+	.	ID=DT33116-RA:exon:5383;Parent=DT33116-RA;
jcf7180002376524_pilon	maker	exon	22507	22580	.	+	.	ID=DT33117-RA:exon:5384;Parent=DT33117-RA;
jcf7180002376524_pilon	maker	exon	22710	22782	.	+	.	ID=DT33118-RA:exon:5385;Parent=DT33118-RA;
jcf7180002376524_pilon	maker	exon	22956	22992	.	+	.	ID=DT33119-RA:exon:5386;Parent=DT33119-RA;
jcf7180002376524_pilon	maker	exon	23009	23044	.	+	.	ID=DT33119-RA:exon:5387;Parent=DT33119-RA;
jcf7180002376524_pilon	maker	exon	23146	23219	.	+	.	ID=DT33120-RA:exon:5388;Parent=DT33120-RA;
jcf7180002376524_pilon	maker	exon	23349	23422	.	+	.	ID=DT33121-RA:exon:5389;Parent=DT33121-RA;
jcf7180002376524_pilon	maker	exon	23596	23632	.	+	.	ID=DT33122-RA:exon:5390;Parent=DT33122-RA;
jcf7180002376524_pilon	maker	exon	23648	23683	.	+	.	ID=DT33122-RA:exon:5391;Parent=DT33122-RA;
jcf7180002376524_pilon	maker	exon	23785	23858	.	+	.	ID=DT33123-RA:exon:5392;Parent=DT33123-RA;
jcf7180002376524_pilon	maker	exon	23988	24061	.	+	.	ID=DT33124-RA:exon:5393;Parent=DT33124-RA;
jcf7180002376524_pilon	maker	exon	24234	24270	.	+	.	ID=DT33125-RA:exon:5394;Parent=DT33125-RA;
jcf7180002376524_pilon	maker	exon	24287	24322	.	+	.	ID=DT33125-RA:exon:5395;Parent=DT33125-RA;
jcf7180002376524_pilon	maker	exon	24424	24497	.	+	.	ID=DT33126-RA:exon:5396;Parent=DT33126-RA;
jcf7180002376524_pilon	maker	exon	24627	24700	.	+	.	ID=DT33127-RA:exon:5397;Parent=DT33127-RA;
jcf7180002376524_pilon	maker	exon	24866	24902	.	+	.	ID=DT33128-RA:exon:5398;Parent=DT33128-RA;
jcf7180002376524_pilon	maker	exon	24917	24952	.	+	.	ID=DT33128-RA:exon:5399;Parent=DT33128-RA;
jcf7180002376524_pilon	maker	exon	25054	25127	.	+	.	ID=DT33129-RA:exon:5400;Parent=DT33129-RA;
jcf7180002376524_pilon	maker	exon	25257	25330	.	+	.	ID=DT33130-RA:exon:5401;Parent=DT33130-RA;
jcf7180002376524_pilon	maker	exon	25504	25540	.	+	.	ID=DT33131-RA:exon:5402;Parent=DT33131-RA;
jcf7180002376524_pilon	maker	exon	25557	25592	.	+	.	ID=DT33131-RA:exon:5403;Parent=DT33131-RA;
jcf7180002376524_pilon	maker	exon	25695	25768	.	+	.	ID=DT33132-RA:exon:5404;Parent=DT33132-RA;
jcf7180002376524_pilon	maker	exon	25898	25970	.	+	.	ID=DT33133-RA:exon:5405;Parent=DT33133-RA;
jcf7180002376524_pilon	maker	exon	26142	26178	.	+	.	ID=DT33134-RA:exon:5406;Parent=DT33134-RA;
jcf7180002376524_pilon	maker	exon	26195	26230	.	+	.	ID=DT33134-RA:exon:5407;Parent=DT33134-RA;
jcf7180002376524_pilon	maker	exon	26332	26405	.	+	.	ID=DT33135-RA:exon:5408;Parent=DT33135-RA;
jcf7180002376524_pilon	maker	exon	26535	26608	.	+	.	ID=DT33136-RA:exon:5409;Parent=DT33136-RA;
jcf7180002376524_pilon	maker	exon	26738	26811	.	+	.	ID=DT33137-RA:exon:5410;Parent=DT33137-RA;
jcf7180002376524_pilon	maker	exon	26941	27014	.	+	.	ID=DT33138-RA:exon:5411;Parent=DT33138-RA;
jcf7180002376524_pilon	maker	exon	27188	27224	.	+	.	ID=DT33139-RA:exon:5412;Parent=DT33139-RA;
jcf7180002376524_pilon	maker	exon	27239	27274	.	+	.	ID=DT33139-RA:exon:5413;Parent=DT33139-RA;
jcf7180002376524_pilon	maker	exon	27376	27449	.	+	.	ID=DT33140-RA:exon:5414;Parent=DT33140-RA;
jcf7180002376524_pilon	maker	exon	27579	27652	.	+	.	ID=DT33141-RA:exon:5415;Parent=DT33141-RA;
jcf7180002376524_pilon	maker	exon	27826	27862	.	+	.	ID=DT33142-RA:exon:5416;Parent=DT33142-RA;
jcf7180002376524_pilon	maker	exon	27879	27914	.	+	.	ID=DT33142-RA:exon:5417;Parent=DT33142-RA;
jcf7180002376524_pilon	maker	exon	28016	28089	.	+	.	ID=DT33143-RA:exon:5418;Parent=DT33143-RA;
jcf7180002376524_pilon	maker	exon	28219	28292	.	+	.	ID=DT33144-RA:exon:5419;Parent=DT33144-RA;
jcf7180002376524_pilon	maker	exon	28785	28858	.	+	.	ID=DT33145-RA:exon:5420;Parent=DT33145-RA;
jcf7180002376524_pilon	maker	exon	28989	29062	.	+	.	ID=DT33146-RA:exon:5421;Parent=DT33146-RA;
jcf7180002376524_pilon	maker	exon	29235	29271	.	+	.	ID=DT33147-RA:exon:5422;Parent=DT33147-RA;
jcf7180002376524_pilon	maker	exon	29288	29323	.	+	.	ID=DT33147-RA:exon:5423;Parent=DT33147-RA;
jcf7180002376524_pilon	maker	exon	29425	29498	.	+	.	ID=DT33148-RA:exon:5424;Parent=DT33148-RA;
jcf7180002376524_pilon	maker	exon	29628	29701	.	+	.	ID=DT33149-RA:exon:5425;Parent=DT33149-RA;
jcf7180002376524_pilon	maker	exon	29874	29910	.	+	.	ID=DT33150-RA:exon:5426;Parent=DT33150-RA;
jcf7180002376524_pilon	maker	exon	29927	29962	.	+	.	ID=DT33150-RA:exon:5427;Parent=DT33150-RA;
jcf7180002376524_pilon	maker	exon	30064	30137	.	+	.	ID=DT33151-RA:exon:5428;Parent=DT33151-RA;
jcf7180002376524_pilon	maker	exon	30267	30340	.	+	.	ID=DT33152-RA:exon:5429;Parent=DT33152-RA;
jcf7180002376524_pilon	maker	exon	30514	30550	.	+	.	ID=DT33153-RA:exon:5430;Parent=DT33153-RA;
jcf7180002376524_pilon	maker	exon	30567	30602	.	+	.	ID=DT33153-RA:exon:5431;Parent=DT33153-RA;
jcf7180002376524_pilon	maker	exon	30703	30776	.	+	.	ID=DT33154-RA:exon:5432;Parent=DT33154-RA;
jcf7180002376524_pilon	maker	exon	30950	30986	.	+	.	ID=DT33155-RA:exon:5433;Parent=DT33155-RA;
jcf7180002376524_pilon	maker	exon	31003	31038	.	+	.	ID=DT33155-RA:exon:5434;Parent=DT33155-RA;
jcf7180002376524_pilon	maker	exon	31140	31213	.	+	.	ID=DT33156-RA:exon:5435;Parent=DT33156-RA;
jcf7180002376524_pilon	maker	exon	31343	31415	.	+	.	ID=DT33157-RA:exon:5436;Parent=DT33157-RA;
jcf7180002376524_pilon	maker	exon	31589	31625	.	+	.	ID=DT33158-RA:exon:5437;Parent=DT33158-RA;
jcf7180002376524_pilon	maker	exon	31642	31677	.	+	.	ID=DT33158-RA:exon:5438;Parent=DT33158-RA;
jcf7180002376524_pilon	maker	exon	31779	31852	.	+	.	ID=DT33159-RA:exon:5439;Parent=DT33159-RA;
jcf7180002376524_pilon	maker	exon	31982	32055	.	+	.	ID=DT33160-RA:exon:5440;Parent=DT33160-RA;
jcf7180002376524_pilon	maker	exon	32229	32265	.	+	.	ID=DT33161-RA:exon:5441;Parent=DT33161-RA;
jcf7180002376524_pilon	maker	exon	32282	32317	.	+	.	ID=DT33161-RA:exon:5442;Parent=DT33161-RA;
jcf7180002376524_pilon	maker	exon	32420	32493	.	+	.	ID=DT33162-RA:exon:5443;Parent=DT33162-RA;
jcf7180002376524_pilon	maker	exon	32623	32696	.	+	.	ID=DT33163-RA:exon:5444;Parent=DT33163-RA;
jcf7180002376524_pilon	maker	exon	32869	32905	.	+	.	ID=DT33164-RA:exon:5445;Parent=DT33164-RA;
jcf7180002376524_pilon	maker	exon	32922	32957	.	+	.	ID=DT33164-RA:exon:5446;Parent=DT33164-RA;
jcf7180002376524_pilon	maker	exon	33060	33133	.	+	.	ID=DT33165-RA:exon:5447;Parent=DT33165-RA;
jcf7180002376524_pilon	maker	exon	33263	33336	.	+	.	ID=DT33166-RA:exon:5448;Parent=DT33166-RA;
jcf7180002376524_pilon	maker	exon	33510	33546	.	+	.	ID=DT33167-RA:exon:5449;Parent=DT33167-RA;
jcf7180002376524_pilon	maker	exon	33563	33598	.	+	.	ID=DT33167-RA:exon:5450;Parent=DT33167-RA;
jcf7180002376524_pilon	maker	exon	33701	33774	.	+	.	ID=DT33168-RA:exon:5451;Parent=DT33168-RA;
jcf7180002376524_pilon	maker	exon	33904	33977	.	+	.	ID=DT33169-RA:exon:5452;Parent=DT33169-RA;
jcf7180002376524_pilon	maker	exon	34107	34180	.	+	.	ID=DT33170-RA:exon:5453;Parent=DT33170-RA;
jcf7180002376524_pilon	maker	exon	34310	34383	.	+	.	ID=DT33171-RA:exon:5454;Parent=DT33171-RA;
jcf7180002376524_pilon	maker	exon	34556	34592	.	+	.	ID=DT33172-RA:exon:5455;Parent=DT33172-RA;
jcf7180002376524_pilon	maker	exon	34609	34644	.	+	.	ID=DT33172-RA:exon:5456;Parent=DT33172-RA;
jcf7180002376524_pilon	maker	exon	34746	34819	.	+	.	ID=DT33173-RA:exon:5457;Parent=DT33173-RA;
jcf7180002376524_pilon	maker	exon	34949	35022	.	+	.	ID=DT33174-RA:exon:5458;Parent=DT33174-RA;
jcf7180002376524_pilon	maker	exon	35152	35225	.	+	.	ID=DT33175-RA:exon:5459;Parent=DT33175-RA;
jcf7180002376524_pilon	maker	exon	35399	35435	.	+	.	ID=DT33176-RA:exon:5460;Parent=DT33176-RA;
jcf7180002376524_pilon	maker	exon	35452	35487	.	+	.	ID=DT33176-RA:exon:5461;Parent=DT33176-RA;
jcf7180002376524_pilon	maker	exon	35589	35662	.	+	.	ID=DT33177-RA:exon:5462;Parent=DT33177-RA;
jcf7180002376524_pilon	maker	exon	35836	35872	.	+	.	ID=DT33178-RA:exon:5463;Parent=DT33178-RA;
jcf7180002376524_pilon	maker	exon	35889	35924	.	+	.	ID=DT33178-RA:exon:5464;Parent=DT33178-RA;
jcf7180002376524_pilon	maker	exon	36027	36100	.	+	.	ID=DT33179-RA:exon:5465;Parent=DT33179-RA;
jcf7180002376524_pilon	maker	exon	36274	36310	.	+	.	ID=DT33180-RA:exon:5466;Parent=DT33180-RA;
jcf7180002376524_pilon	maker	exon	36327	36362	.	+	.	ID=DT33180-RA:exon:5467;Parent=DT33180-RA;
jcf7180002376524_pilon	maker	exon	167	240	.	-	.	ID=DT33017-RA:exon:5468;Parent=DT33017-RA;
jcf7180002376524_pilon	maker	exon	367	440	.	-	.	ID=DT33018-RA:exon:5469;Parent=DT33018-RA;
jcf7180002376524_pilon	maker	exon	570	643	.	-	.	ID=DT33019-RA:exon:5470;Parent=DT33019-RA;
jcf7180002376524_pilon	maker	exon	773	846	.	-	.	ID=DT33020-RA:exon:5471;Parent=DT33020-RA;
jcf7180002376524_pilon	maker	exon	976	1049	.	-	.	ID=DT33021-RA:exon:5472;Parent=DT33021-RA;
jcf7180002376524_pilon	maker	exon	1179	1252	.	-	.	ID=DT33022-RA:exon:5473;Parent=DT33022-RA;
jcf7180002376524_pilon	maker	exon	1382	1455	.	-	.	ID=DT33023-RA:exon:5474;Parent=DT33023-RA;
jcf7180002376524_pilon	maker	exon	1609	1645	.	-	.	ID=DT33024-RA:exon:5476;Parent=DT33024-RA;
jcf7180002376524_pilon	maker	exon	1557	1592	.	-	.	ID=DT33024-RA:exon:5475;Parent=DT33024-RA;
jcf7180002376524_pilon	maker	exon	1811	1884	.	-	.	ID=DT33025-RA:exon:5477;Parent=DT33025-RA;
jcf7180002376524_pilon	maker	exon	2014	2087	.	-	.	ID=DT33026-RA:exon:5478;Parent=DT33026-RA;
jcf7180002376524_pilon	maker	exon	2217	2290	.	-	.	ID=DT33027-RA:exon:5479;Parent=DT33027-RA;
jcf7180002376524_pilon	maker	exon	2438	2474	.	-	.	ID=DT33028-RA:exon:5481;Parent=DT33028-RA;
jcf7180002376524_pilon	maker	exon	2388	2423	.	-	.	ID=DT33028-RA:exon:5480;Parent=DT33028-RA;
jcf7180002376524_pilon	maker	exon	2648	2719	.	-	.	ID=DT33029-RA:exon:5482;Parent=DT33029-RA;
jcf7180002351342_pilon	maker	exon	227	421	.	+	.	ID=DT35073-RA:exon:40;Parent=DT35073-RA;
jcf7180002351342_pilon	maker	exon	831	896	.	+	.	ID=DT35073-RA:exon:41;Parent=DT35073-RA;
jcf7180002351342_pilon	maker	exon	1005	1087	.	+	.	ID=DT35073-RA:exon:42;Parent=DT35073-RA;
jcf7180002351342_pilon	maker	exon	1191	1287	.	+	.	ID=DT35073-RA:exon:43;Parent=DT35073-RA;
jcf7180002351342_pilon	maker	exon	1590	1651	.	+	.	ID=DT35073-RA:exon:44;Parent=DT35073-RA;
jcf7180002351342_pilon	maker	exon	1740	1804	.	+	.	ID=DT35073-RA:exon:45;Parent=DT35073-RA;
jcf7180002351342_pilon	maker	exon	1889	1995	.	+	.	ID=DT35073-RA:exon:46;Parent=DT35073-RA;
jcf7180002351342_pilon	maker	exon	2365	2481	.	+	.	ID=DT35073-RA:exon:47;Parent=DT35073-RA;
jcf7180002374983_pilon	maker	exon	180699	180938	.	+	.	ID=DT07186-RA:exon:1292;Parent=DT07186-RA;
jcf7180002374983_pilon	maker	exon	181320	181444	.	+	.	ID=DT07186-RA:exon:1293;Parent=DT07186-RA;
jcf7180002374983_pilon	maker	exon	182489	184850	.	+	.	ID=DT07186-RA:exon:1294;Parent=DT07186-RA;
jcf7180002374983_pilon	maker	exon	245694	245999	.	+	.	ID=DT07190-RA:exon:1295;Parent=DT07190-RA;
jcf7180002374983_pilon	maker	exon	246560	247097	.	+	.	ID=DT07190-RA:exon:1296;Parent=DT07190-RA;
jcf7180002374983_pilon	maker	exon	250106	250299	.	+	.	ID=DT07190-RA:exon:1297;Parent=DT07190-RA;
jcf7180002374983_pilon	maker	exon	252991	253187	.	+	.	ID=DT07190-RA:exon:1298;Parent=DT07190-RA;
jcf7180002374983_pilon	maker	exon	255583	255984	.	+	.	ID=DT07190-RA:exon:1299;Parent=DT07190-RA;
jcf7180002374983_pilon	maker	exon	256059	256193	.	+	.	ID=DT07190-RA:exon:1300;Parent=DT07190-RA;
jcf7180002374983_pilon	maker	exon	258095	258269	.	+	.	ID=DT07190-RA:exon:1301;Parent=DT07190-RA;
jcf7180002374983_pilon	maker	exon	258350	258593	.	+	.	ID=DT07190-RA:exon:1302;Parent=DT07190-RA;
jcf7180002374983_pilon	maker	exon	260582	260740	.	+	.	ID=DT07190-RA:exon:1303;Parent=DT07190-RA;
jcf7180002374983_pilon	maker	exon	261621	262468	.	+	.	ID=DT07190-RA:exon:1304;Parent=DT07190-RA;
jcf7180002374983_pilon	maker	exon	169525	169763	.	+	.	ID=DT07185-RA:exon:1305;Parent=DT07185-RA,DT07185-RB;
jcf7180002374983_pilon	maker	exon	171260	171293	.	+	.	ID=DT07185-RA:exon:1306;Parent=DT07185-RA,DT07185-RB;
jcf7180002374983_pilon	maker	exon	171720	171750	.	+	.	ID=DT07185-RA:exon:1307;Parent=DT07185-RA,DT07185-RB;
jcf7180002374983_pilon	maker	exon	171827	171887	.	+	.	ID=DT07185-RA:exon:1308;Parent=DT07185-RA,DT07185-RB;
jcf7180002374983_pilon	maker	exon	174679	174872	.	+	.	ID=DT07185-RA:exon:1309;Parent=DT07185-RA,DT07185-RB;
jcf7180002374983_pilon	maker	exon	174941	175000	.	+	.	ID=DT07185-RA:exon:1310;Parent=DT07185-RA,DT07185-RB;
jcf7180002374983_pilon	maker	exon	175075	175151	.	+	.	ID=DT07185-RA:exon:1311;Parent=DT07185-RA,DT07185-RB;
jcf7180002374983_pilon	maker	exon	175237	175372	.	+	.	ID=DT07185-RA:exon:1312;Parent=DT07185-RA,DT07185-RB;
jcf7180002374983_pilon	maker	exon	176824	176908	.	+	.	ID=DT07185-RA:exon:1313;Parent=DT07185-RA,DT07185-RB;
jcf7180002374983_pilon	maker	exon	178006	178078	.	+	.	ID=DT07185-RA:exon:1314;Parent=DT07185-RA,DT07185-RB;
jcf7180002374983_pilon	maker	exon	178199	178336	.	+	.	ID=DT07185-RA:exon:1315;Parent=DT07185-RA,DT07185-RB;
jcf7180002374983_pilon	maker	exon	178414	178524	.	+	.	ID=DT07185-RA:exon:1316;Parent=DT07185-RA,DT07185-RB;
jcf7180002374983_pilon	maker	exon	178770	178831	.	+	.	ID=DT07185-RA:exon:1317;Parent=DT07185-RA,DT07185-RB;
jcf7180002374983_pilon	maker	exon	179655	179834	.	+	.	ID=DT07185-RA:exon:1318;Parent=DT07185-RA;
jcf7180002374983_pilon	maker	exon	179877	180060	.	+	.	ID=DT07185-RA:exon:1319;Parent=DT07185-RA;
jcf7180002374983_pilon	maker	exon	179655	180060	.	+	.	ID=DT07185-RB:exon:1320;Parent=DT07185-RB;
jcf7180002374983_pilon	maker	exon	276659	277410	.	-	.	ID=DT07192-RA:exon:1323;Parent=DT07192-RA;
jcf7180002374983_pilon	maker	exon	277510	277655	.	-	.	ID=DT07192-RA:exon:1322;Parent=DT07192-RA;
jcf7180002374983_pilon	maker	exon	278908	279458	.	-	.	ID=DT07192-RA:exon:1321;Parent=DT07192-RA;
jcf7180002374983_pilon	maker	exon	96429	97322	.	-	.	ID=DT07181-RA:exon:1324;Parent=DT07181-RA;
jcf7180002374983_pilon	maker	exon	222027	222188	.	-	.	ID=DT07189-RB:exon:1338;Parent=DT07189-RB;
jcf7180002374983_pilon	maker	exon	224849	224859	.	-	.	ID=DT07189-RB:exon:1337;Parent=DT07189-RB,DT07189-RA;
jcf7180002374983_pilon	maker	exon	218097	219635	.	-	.	ID=DT07189-RF:exon:1336;Parent=DT07189-RF,DT07189-RB,DT07189-RA,DT07189-RD;
jcf7180002374983_pilon	maker	exon	216564	217050	.	-	.	ID=DT07189-RE:exon:1335;Parent=DT07189-RE,DT07189-RF,DT07189-RB,DT07189-RA,DT07189-RD;
jcf7180002374983_pilon	maker	exon	215802	216262	.	-	.	ID=DT07189-RC:exon:1334;Parent=DT07189-RC,DT07189-RE,DT07189-RF,DT07189-RB,DT07189-RA,DT07189-RD;
jcf7180002374983_pilon	maker	exon	216348	216488	.	-	.	ID=DT07189-RC:exon:1333;Parent=DT07189-RC,DT07189-RE,DT07189-RF,DT07189-RB,DT07189-RA,DT07189-RD;
jcf7180002374983_pilon	maker	exon	216552	217050	.	-	.	ID=DT07189-RC:exon:1332;Parent=DT07189-RC;
jcf7180002374983_pilon	maker	exon	218097	218425	.	-	.	ID=DT07189-RC:exon:1331;Parent=DT07189-RC,DT07189-RE;
jcf7180002374983_pilon	maker	exon	219226	219328	.	-	.	ID=DT07189-RC:exon:1330;Parent=DT07189-RC,DT07189-RE;
jcf7180002374983_pilon	maker	exon	219424	219635	.	-	.	ID=DT07189-RC:exon:1329;Parent=DT07189-RC,DT07189-RE;
jcf7180002374983_pilon	maker	exon	222054	222188	.	-	.	ID=DT07189-RC:exon:1328;Parent=DT07189-RC,DT07189-RE,DT07189-RF,DT07189-RA;
jcf7180002374983_pilon	maker	exon	224094	224266	.	-	.	ID=DT07189-RC:exon:1327;Parent=DT07189-RC,DT07189-RE,DT07189-RF,DT07189-RB,DT07189-RA,DT07189-RD;
jcf7180002374983_pilon	maker	exon	224358	224599	.	-	.	ID=DT07189-RC:exon:1326;Parent=DT07189-RC,DT07189-RE,DT07189-RF,DT07189-RB,DT07189-RA,DT07189-RD;
jcf7180002374983_pilon	maker	exon	226702	227080	.	-	.	ID=DT07189-RC:exon:1325;Parent=DT07189-RC,DT07189-RE,DT07189-RF,DT07189-RD;
jcf7180002374983_pilon	maker	exon	266425	268246	.	-	.	ID=DT07191-RB:exon:1345;Parent=DT07191-RB;
jcf7180002374983_pilon	maker	exon	266425	267326	.	-	.	ID=DT07191-RA:exon:1344;Parent=DT07191-RA;
jcf7180002374983_pilon	maker	exon	268187	268246	.	-	.	ID=DT07191-RA:exon:1343;Parent=DT07191-RA;
jcf7180002374983_pilon	maker	exon	268654	268710	.	-	.	ID=DT07191-RA:exon:1342;Parent=DT07191-RA,DT07191-RB;
jcf7180002374983_pilon	maker	exon	269082	269237	.	-	.	ID=DT07191-RA:exon:1341;Parent=DT07191-RA,DT07191-RB;
jcf7180002374983_pilon	maker	exon	272267	272321	.	-	.	ID=DT07191-RA:exon:1340;Parent=DT07191-RA,DT07191-RB;
jcf7180002374983_pilon	maker	exon	274601	274738	.	-	.	ID=DT07191-RA:exon:1339;Parent=DT07191-RA,DT07191-RB;
jcf7180002374983_pilon	maker	exon	139429	140213	.	-	.	ID=DT07184-RC:exon:1374;Parent=DT07184-RC,DT07184-RD;
jcf7180002374983_pilon	maker	exon	142355	142629	.	-	.	ID=DT07184-RB:exon:1373;Parent=DT07184-RB,DT07184-RD;
jcf7180002374983_pilon	maker	exon	136783	137361	.	-	.	ID=DT07184-RA:exon:1372;Parent=DT07184-RA,DT07184-RB,DT07184-RC,DT07184-RD;
jcf7180002374983_pilon	maker	exon	137455	137507	.	-	.	ID=DT07184-RA:exon:1371;Parent=DT07184-RA,DT07184-RB,DT07184-RC,DT07184-RD;
jcf7180002374983_pilon	maker	exon	139429	140215	.	-	.	ID=DT07184-RA:exon:1370;Parent=DT07184-RA,DT07184-RB;
jcf7180002374983_pilon	maker	exon	141654	141702	.	-	.	ID=DT07184-RA:exon:1369;Parent=DT07184-RA,DT07184-RB;
jcf7180002374983_pilon	maker	exon	141950	142105	.	-	.	ID=DT07184-RA:exon:1368;Parent=DT07184-RA,DT07184-RB,DT07184-RC,DT07184-RD;
jcf7180002374983_pilon	maker	exon	142170	142257	.	-	.	ID=DT07184-RA:exon:1367;Parent=DT07184-RA,DT07184-RB,DT07184-RC,DT07184-RD;
jcf7180002374983_pilon	maker	exon	142355	142443	.	-	.	ID=DT07184-RA:exon:1366;Parent=DT07184-RA,DT07184-RC;
jcf7180002374983_pilon	maker	exon	142522	142629	.	-	.	ID=DT07184-RA:exon:1365;Parent=DT07184-RA,DT07184-RC;
jcf7180002374983_pilon	maker	exon	144328	144414	.	-	.	ID=DT07184-RA:exon:1364;Parent=DT07184-RA,DT07184-RB,DT07184-RC,DT07184-RD;
jcf7180002374983_pilon	maker	exon	145895	145976	.	-	.	ID=DT07184-RA:exon:1363;Parent=DT07184-RA,DT07184-RB,DT07184-RC,DT07184-RD;
jcf7180002374983_pilon	maker	exon	146898	146986	.	-	.	ID=DT07184-RA:exon:1362;Parent=DT07184-RA,DT07184-RB,DT07184-RC,DT07184-RD;
jcf7180002374983_pilon	maker	exon	147097	147196	.	-	.	ID=DT07184-RA:exon:1361;Parent=DT07184-RA,DT07184-RB,DT07184-RC,DT07184-RD;
jcf7180002374983_pilon	maker	exon	147398	147536	.	-	.	ID=DT07184-RA:exon:1360;Parent=DT07184-RA,DT07184-RB,DT07184-RC,DT07184-RD;
jcf7180002374983_pilon	maker	exon	148990	149086	.	-	.	ID=DT07184-RA:exon:1359;Parent=DT07184-RA,DT07184-RB,DT07184-RC,DT07184-RD;
jcf7180002374983_pilon	maker	exon	149181	149298	.	-	.	ID=DT07184-RA:exon:1358;Parent=DT07184-RA,DT07184-RB,DT07184-RC,DT07184-RD;
jcf7180002374983_pilon	maker	exon	149375	149525	.	-	.	ID=DT07184-RA:exon:1357;Parent=DT07184-RA,DT07184-RB,DT07184-RC,DT07184-RD;
jcf7180002374983_pilon	maker	exon	149537	149571	.	-	.	ID=DT07184-RA:exon:1356;Parent=DT07184-RA,DT07184-RB,DT07184-RC,DT07184-RD;
jcf7180002374983_pilon	maker	exon	151389	151489	.	-	.	ID=DT07184-RA:exon:1355;Parent=DT07184-RA,DT07184-RB,DT07184-RC,DT07184-RD;
jcf7180002374983_pilon	maker	exon	153710	153797	.	-	.	ID=DT07184-RA:exon:1354;Parent=DT07184-RA,DT07184-RB,DT07184-RC,DT07184-RD;
jcf7180002374983_pilon	maker	exon	153884	154006	.	-	.	ID=DT07184-RA:exon:1353;Parent=DT07184-RA,DT07184-RB,DT07184-RC,DT07184-RD;
jcf7180002374983_pilon	maker	exon	155280	155367	.	-	.	ID=DT07184-RA:exon:1352;Parent=DT07184-RA,DT07184-RB,DT07184-RC,DT07184-RD;
jcf7180002374983_pilon	maker	exon	155459	155599	.	-	.	ID=DT07184-RA:exon:1351;Parent=DT07184-RA,DT07184-RB,DT07184-RC,DT07184-RD;
jcf7180002374983_pilon	maker	exon	156880	157015	.	-	.	ID=DT07184-RA:exon:1350;Parent=DT07184-RA,DT07184-RB,DT07184-RC,DT07184-RD;
jcf7180002374983_pilon	maker	exon	157260	157398	.	-	.	ID=DT07184-RA:exon:1349;Parent=DT07184-RA,DT07184-RB,DT07184-RC,DT07184-RD;
jcf7180002374983_pilon	maker	exon	158360	158423	.	-	.	ID=DT07184-RA:exon:1348;Parent=DT07184-RA,DT07184-RB,DT07184-RC,DT07184-RD;
jcf7180002374983_pilon	maker	exon	161922	162144	.	-	.	ID=DT07184-RA:exon:1347;Parent=DT07184-RA,DT07184-RB,DT07184-RC,DT07184-RD;
jcf7180002374983_pilon	maker	exon	162793	162926	.	-	.	ID=DT07184-RA:exon:1346;Parent=DT07184-RA,DT07184-RB,DT07184-RC,DT07184-RD;
jcf7180002374983_pilon	maker	exon	128671	129768	.	-	.	ID=DT07183-RA:exon:1375;Parent=DT07183-RA;
jcf7180002374983_pilon	maker	exon	190655	191337	.	-	.	ID=DT07187-RB:exon:1386;Parent=DT07187-RB;
jcf7180002374983_pilon	maker	exon	191427	191515	.	-	.	ID=DT07187-RB:exon:1385;Parent=DT07187-RB;
jcf7180002374983_pilon	maker	exon	192226	192341	.	-	.	ID=DT07187-RB:exon:1384;Parent=DT07187-RB;
jcf7180002374983_pilon	maker	exon	192415	192478	.	-	.	ID=DT07187-RB:exon:1383;Parent=DT07187-RB;
jcf7180002374983_pilon	maker	exon	192559	193093	.	-	.	ID=DT07187-RB:exon:1382;Parent=DT07187-RB;
jcf7180002374983_pilon	maker	exon	186616	187580	.	-	.	ID=DT07187-RA:exon:1381;Parent=DT07187-RA;
jcf7180002374983_pilon	maker	exon	187656	187744	.	-	.	ID=DT07187-RA:exon:1380;Parent=DT07187-RA;
jcf7180002374983_pilon	maker	exon	188599	188688	.	-	.	ID=DT07187-RA:exon:1379;Parent=DT07187-RA;
jcf7180002374983_pilon	maker	exon	189647	189672	.	-	.	ID=DT07187-RA:exon:1378;Parent=DT07187-RA;
jcf7180002374983_pilon	maker	exon	189980	190060	.	-	.	ID=DT07187-RA:exon:1377;Parent=DT07187-RA;
jcf7180002374983_pilon	maker	exon	190265	190661	.	-	.	ID=DT07187-RA:exon:1376;Parent=DT07187-RA;
jcf7180002374983_pilon	maker	exon	100648	100711	.	-	.	ID=DT07182-RA:exon:1391;Parent=DT07182-RA;
jcf7180002374983_pilon	maker	exon	104553	104683	.	-	.	ID=DT07182-RA:exon:1390;Parent=DT07182-RA;
jcf7180002374983_pilon	maker	exon	104784	104847	.	-	.	ID=DT07182-RA:exon:1389;Parent=DT07182-RA;
jcf7180002374983_pilon	maker	exon	107684	107848	.	-	.	ID=DT07182-RA:exon:1388;Parent=DT07182-RA;
jcf7180002374983_pilon	maker	exon	107996	108028	.	-	.	ID=DT07182-RA:exon:1387;Parent=DT07182-RA;
jcf7180002374983_pilon	maker	exon	199861	200064	.	-	.	ID=DT07188-RA:exon:1402;Parent=DT07188-RA;
jcf7180002374983_pilon	maker	exon	200772	200842	.	-	.	ID=DT07188-RA:exon:1401;Parent=DT07188-RA;
jcf7180002374983_pilon	maker	exon	203612	203753	.	-	.	ID=DT07188-RA:exon:1400;Parent=DT07188-RA;
jcf7180002374983_pilon	maker	exon	203833	203940	.	-	.	ID=DT07188-RA:exon:1399;Parent=DT07188-RA;
jcf7180002374983_pilon	maker	exon	204008	204201	.	-	.	ID=DT07188-RA:exon:1398;Parent=DT07188-RA;
jcf7180002374983_pilon	maker	exon	205947	206002	.	-	.	ID=DT07188-RA:exon:1397;Parent=DT07188-RA;
jcf7180002374983_pilon	maker	exon	206213	206372	.	-	.	ID=DT07188-RA:exon:1396;Parent=DT07188-RA;
jcf7180002374983_pilon	maker	exon	206761	206903	.	-	.	ID=DT07188-RA:exon:1395;Parent=DT07188-RA;
jcf7180002374983_pilon	maker	exon	207077	207293	.	-	.	ID=DT07188-RA:exon:1394;Parent=DT07188-RA;
jcf7180002374983_pilon	maker	exon	209431	209542	.	-	.	ID=DT07188-RA:exon:1393;Parent=DT07188-RA;
jcf7180002374983_pilon	maker	exon	211774	212133	.	-	.	ID=DT07188-RA:exon:1392;Parent=DT07188-RA;
jcf7180002374983_pilon	maker	exon	572551	572700	.	+	.	ID=DT07209-RA:exon:1403;Parent=DT07209-RA,DT07209-RB;
jcf7180002374983_pilon	maker	exon	573221	575868	.	+	.	ID=DT07209-RA:exon:1404;Parent=DT07209-RA;
jcf7180002374983_pilon	maker	exon	575899	577823	.	+	.	ID=DT07209-RA:exon:1405;Parent=DT07209-RA;
jcf7180002374983_pilon	maker	exon	573221	577823	.	+	.	ID=DT07209-RB:exon:1406;Parent=DT07209-RB;
jcf7180002374983_pilon	maker	exon	638108	638285	.	+	.	ID=DT07214-RA:exon:1407;Parent=DT07214-RA;
jcf7180002374983_pilon	maker	exon	638643	638795	.	+	.	ID=DT07214-RA:exon:1408;Parent=DT07214-RA;
jcf7180002374983_pilon	maker	exon	639446	639543	.	+	.	ID=DT07214-RA:exon:1409;Parent=DT07214-RA,DT07214-RB;
jcf7180002374983_pilon	maker	exon	639656	639789	.	+	.	ID=DT07214-RA:exon:1410;Parent=DT07214-RA,DT07214-RB;
jcf7180002374983_pilon	maker	exon	640351	640418	.	+	.	ID=DT07214-RA:exon:1411;Parent=DT07214-RA,DT07214-RB;
jcf7180002374983_pilon	maker	exon	640499	641349	.	+	.	ID=DT07214-RA:exon:1412;Parent=DT07214-RA,DT07214-RB;
jcf7180002374983_pilon	maker	exon	638635	638795	.	+	.	ID=DT07214-RB:exon:1413;Parent=DT07214-RB;
jcf7180002374983_pilon	maker	exon	500061	500092	.	+	.	ID=DT07200-RA:exon:1414;Parent=DT07200-RA;
jcf7180002374983_pilon	maker	exon	500462	500562	.	+	.	ID=DT07200-RA:exon:1415;Parent=DT07200-RA;
jcf7180002374983_pilon	maker	exon	502053	502193	.	+	.	ID=DT07200-RA:exon:1416;Parent=DT07200-RA;
jcf7180002374983_pilon	maker	exon	502255	502353	.	+	.	ID=DT07200-RA:exon:1417;Parent=DT07200-RA;
jcf7180002374983_pilon	maker	exon	502420	502480	.	+	.	ID=DT07200-RA:exon:1418;Parent=DT07200-RA;
jcf7180002374983_pilon	maker	exon	502675	503942	.	+	.	ID=DT07200-RA:exon:1419;Parent=DT07200-RA;
jcf7180002374983_pilon	maker	exon	503964	504515	.	+	.	ID=DT07200-RA:exon:1420;Parent=DT07200-RA;
jcf7180002374983_pilon	maker	exon	645737	645918	.	+	.	ID=DT07216-RA:exon:1421;Parent=DT07216-RA;
jcf7180002374983_pilon	maker	exon	652323	652328	.	+	.	ID=DT07216-RA:exon:1422;Parent=DT07216-RA;
jcf7180002374983_pilon	maker	exon	655491	655651	.	+	.	ID=DT07216-RA:exon:1423;Parent=DT07216-RA;
jcf7180002374983_pilon	maker	exon	657951	658108	.	+	.	ID=DT07216-RA:exon:1424;Parent=DT07216-RA;
jcf7180002374983_pilon	maker	exon	621917	621992	.	+	.	ID=DT07213-RA:exon:1425;Parent=DT07213-RA;
jcf7180002374983_pilon	maker	exon	622430	622867	.	+	.	ID=DT07213-RA:exon:1426;Parent=DT07213-RA;
jcf7180002374983_pilon	maker	exon	624872	624987	.	+	.	ID=DT07213-RA:exon:1427;Parent=DT07213-RA;
jcf7180002374983_pilon	maker	exon	625066	625194	.	+	.	ID=DT07213-RA:exon:1428;Parent=DT07213-RA;
jcf7180002374983_pilon	maker	exon	626189	626262	.	+	.	ID=DT07213-RA:exon:1429;Parent=DT07213-RA;
jcf7180002374983_pilon	maker	exon	626339	626501	.	+	.	ID=DT07213-RA:exon:1430;Parent=DT07213-RA;
jcf7180002374983_pilon	maker	exon	628428	628517	.	+	.	ID=DT07213-RA:exon:1431;Parent=DT07213-RA;
jcf7180002374983_pilon	maker	exon	628615	628697	.	+	.	ID=DT07213-RA:exon:1432;Parent=DT07213-RA;
jcf7180002374983_pilon	maker	exon	628774	628841	.	+	.	ID=DT07213-RA:exon:1433;Parent=DT07213-RA;
jcf7180002374983_pilon	maker	exon	628912	628997	.	+	.	ID=DT07213-RA:exon:1434;Parent=DT07213-RA;
jcf7180002374983_pilon	maker	exon	631122	631260	.	+	.	ID=DT07213-RA:exon:1435;Parent=DT07213-RA;
jcf7180002374983_pilon	maker	exon	631331	631435	.	+	.	ID=DT07213-RA:exon:1436;Parent=DT07213-RA;
jcf7180002374983_pilon	maker	exon	631511	631621	.	+	.	ID=DT07213-RA:exon:1437;Parent=DT07213-RA;
jcf7180002374983_pilon	maker	exon	631704	631789	.	+	.	ID=DT07213-RA:exon:1438;Parent=DT07213-RA;
jcf7180002374983_pilon	maker	exon	631868	631975	.	+	.	ID=DT07213-RA:exon:1439;Parent=DT07213-RA;
jcf7180002374983_pilon	maker	exon	632042	632155	.	+	.	ID=DT07213-RA:exon:1440;Parent=DT07213-RA;
jcf7180002374983_pilon	maker	exon	634394	634499	.	+	.	ID=DT07213-RA:exon:1441;Parent=DT07213-RA;
jcf7180002374983_pilon	maker	exon	634573	634745	.	+	.	ID=DT07213-RA:exon:1442;Parent=DT07213-RA;
jcf7180002374983_pilon	maker	exon	634821	634943	.	+	.	ID=DT07213-RA:exon:1443;Parent=DT07213-RA;
jcf7180002374983_pilon	maker	exon	636112	637226	.	+	.	ID=DT07213-RA:exon:1444;Parent=DT07213-RA;
jcf7180002374983_pilon	maker	exon	550590	551633	.	+	.	ID=DT07204-RA:exon:1445;Parent=DT07204-RA;
jcf7180002374983_pilon	maker	exon	599206	599370	.	+	.	ID=DT07211-RA:exon:1446;Parent=DT07211-RA;
jcf7180002374983_pilon	maker	exon	601236	601458	.	+	.	ID=DT07211-RA:exon:1447;Parent=DT07211-RA;
jcf7180002374983_pilon	maker	exon	603469	603597	.	+	.	ID=DT07211-RA:exon:1448;Parent=DT07211-RA;
jcf7180002374983_pilon	maker	exon	606256	606369	.	+	.	ID=DT07211-RA:exon:1449;Parent=DT07211-RA;
jcf7180002374983_pilon	maker	exon	606638	606837	.	+	.	ID=DT07211-RA:exon:1450;Parent=DT07211-RA;
jcf7180002374983_pilon	maker	exon	608119	608211	.	+	.	ID=DT07211-RA:exon:1451;Parent=DT07211-RA;
jcf7180002374983_pilon	maker	exon	608288	608956	.	+	.	ID=DT07211-RA:exon:1452;Parent=DT07211-RA;
jcf7180002374983_pilon	maker	exon	359126	359247	.	+	.	ID=DT07195-RA:exon:1453;Parent=DT07195-RA;
jcf7180002374983_pilon	maker	exon	359387	359502	.	+	.	ID=DT07195-RA:exon:1454;Parent=DT07195-RA;
jcf7180002374983_pilon	maker	exon	359639	359723	.	+	.	ID=DT07195-RA:exon:1455;Parent=DT07195-RA;
jcf7180002374983_pilon	maker	exon	360532	360611	.	+	.	ID=DT07195-RA:exon:1456;Parent=DT07195-RA;
jcf7180002374983_pilon	maker	exon	361083	361163	.	+	.	ID=DT07195-RA:exon:1457;Parent=DT07195-RA;
jcf7180002374983_pilon	maker	exon	361283	361399	.	+	.	ID=DT07195-RA:exon:1458;Parent=DT07195-RA;
jcf7180002374983_pilon	maker	exon	361504	361584	.	+	.	ID=DT07195-RA:exon:1459;Parent=DT07195-RA;
jcf7180002374983_pilon	maker	exon	361663	361748	.	+	.	ID=DT07195-RA:exon:1460;Parent=DT07195-RA;
jcf7180002374983_pilon	maker	exon	361878	361935	.	+	.	ID=DT07195-RA:exon:1461;Parent=DT07195-RA;
jcf7180002374983_pilon	maker	exon	362039	362134	.	+	.	ID=DT07195-RA:exon:1462;Parent=DT07195-RA;
jcf7180002374983_pilon	maker	exon	363104	363185	.	+	.	ID=DT07195-RA:exon:1463;Parent=DT07195-RA;
jcf7180002374983_pilon	maker	exon	363261	363300	.	+	.	ID=DT07195-RA:exon:1464;Parent=DT07195-RA;
jcf7180002374983_pilon	maker	exon	363850	364001	.	+	.	ID=DT07195-RA:exon:1465;Parent=DT07195-RA;
jcf7180002374983_pilon	maker	exon	365003	365088	.	+	.	ID=DT07195-RA:exon:1466;Parent=DT07195-RA;
jcf7180002374983_pilon	maker	exon	365403	365540	.	+	.	ID=DT07195-RA:exon:1467;Parent=DT07195-RA;
jcf7180002374983_pilon	maker	exon	365617	365719	.	+	.	ID=DT07195-RA:exon:1468;Parent=DT07195-RA;
jcf7180002374983_pilon	maker	exon	365971	366095	.	+	.	ID=DT07195-RA:exon:1469;Parent=DT07195-RA;
jcf7180002374983_pilon	maker	exon	366178	366263	.	+	.	ID=DT07195-RA:exon:1470;Parent=DT07195-RA;
jcf7180002374983_pilon	maker	exon	367465	367518	.	+	.	ID=DT07195-RA:exon:1471;Parent=DT07195-RA;
jcf7180002374983_pilon	maker	exon	367597	367637	.	+	.	ID=DT07195-RA:exon:1472;Parent=DT07195-RA;
jcf7180002374983_pilon	maker	exon	367714	367800	.	+	.	ID=DT07195-RA:exon:1473;Parent=DT07195-RA;
jcf7180002374983_pilon	maker	exon	367880	367950	.	+	.	ID=DT07195-RA:exon:1474;Parent=DT07195-RA;
jcf7180002374983_pilon	maker	exon	369689	369761	.	+	.	ID=DT07195-RA:exon:1475;Parent=DT07195-RA;
jcf7180002374983_pilon	maker	exon	369835	369984	.	+	.	ID=DT07195-RA:exon:1476;Parent=DT07195-RA;
jcf7180002374983_pilon	maker	exon	371023	371131	.	+	.	ID=DT07195-RA:exon:1477;Parent=DT07195-RA;
jcf7180002374983_pilon	maker	exon	371203	371323	.	+	.	ID=DT07195-RA:exon:1478;Parent=DT07195-RA;
jcf7180002374983_pilon	maker	exon	371650	371758	.	+	.	ID=DT07195-RA:exon:1479;Parent=DT07195-RA;
jcf7180002374983_pilon	maker	exon	373232	373290	.	+	.	ID=DT07195-RA:exon:1480;Parent=DT07195-RA;
jcf7180002374983_pilon	maker	exon	374425	374490	.	+	.	ID=DT07195-RA:exon:1481;Parent=DT07195-RA;
jcf7180002374983_pilon	maker	exon	565075	565143	.	+	.	ID=DT07207-RA:exon:1482;Parent=DT07207-RA;
jcf7180002374983_pilon	maker	exon	565289	565378	.	+	.	ID=DT07207-RA:exon:1483;Parent=DT07207-RA;
jcf7180002374983_pilon	maker	exon	565463	565553	.	+	.	ID=DT07207-RA:exon:1484;Parent=DT07207-RA;
jcf7180002374983_pilon	maker	exon	614740	614746	.	-	.	ID=DT07212-RA:exon:1494;Parent=DT07212-RA;
jcf7180002374983_pilon	maker	exon	613716	614273	.	-	.	ID=DT07212-RC:exon:1493;Parent=DT07212-RC,DT07212-RA;
jcf7180002374983_pilon	maker	exon	614510	614626	.	-	.	ID=DT07212-RC:exon:1492;Parent=DT07212-RC,DT07212-RA;
jcf7180002374983_pilon	maker	exon	613716	615501	.	-	.	ID=DT07212-RB:exon:1491;Parent=DT07212-RB;
jcf7180002374983_pilon	maker	exon	615522	615959	.	-	.	ID=DT07212-RB:exon:1490;Parent=DT07212-RB;
jcf7180002374983_pilon	maker	exon	617742	617912	.	-	.	ID=DT07212-RB:exon:1489;Parent=DT07212-RB,DT07212-RC;
jcf7180002374983_pilon	maker	exon	618115	618169	.	-	.	ID=DT07212-RB:exon:1488;Parent=DT07212-RB,DT07212-RC;
jcf7180002374983_pilon	maker	exon	618312	618440	.	-	.	ID=DT07212-RB:exon:1487;Parent=DT07212-RB,DT07212-RC;
jcf7180002374983_pilon	maker	exon	618521	618867	.	-	.	ID=DT07212-RB:exon:1486;Parent=DT07212-RB,DT07212-RC;
jcf7180002374983_pilon	maker	exon	620290	620558	.	-	.	ID=DT07212-RB:exon:1485;Parent=DT07212-RB,DT07212-RC;
jcf7180002374983_pilon	maker	exon	419797	419921	.	-	.	ID=DT07198-RA:exon:1496;Parent=DT07198-RA;
jcf7180002374983_pilon	maker	exon	418794	418962	.	-	.	ID=DT07198-RA:exon:1495;Parent=DT07198-RA;
jcf7180002374983_pilon	maker	exon	552541	552766	.	-	.	ID=DT07205-RA:exon:1499;Parent=DT07205-RA;
jcf7180002374983_pilon	maker	exon	554353	554456	.	-	.	ID=DT07205-RA:exon:1498;Parent=DT07205-RA;
jcf7180002374983_pilon	maker	exon	554661	554949	.	-	.	ID=DT07205-RA:exon:1497;Parent=DT07205-RA;
jcf7180002374983_pilon	maker	exon	555547	556375	.	-	.	ID=DT07206-RA:exon:1509;Parent=DT07206-RA;
jcf7180002374983_pilon	maker	exon	559880	560124	.	-	.	ID=DT07206-RA:exon:1508;Parent=DT07206-RA;
jcf7180002374983_pilon	maker	exon	560328	560448	.	-	.	ID=DT07206-RA:exon:1507;Parent=DT07206-RA;
jcf7180002374983_pilon	maker	exon	560722	560913	.	-	.	ID=DT07206-RA:exon:1506;Parent=DT07206-RA;
jcf7180002374983_pilon	maker	exon	560987	561030	.	-	.	ID=DT07206-RA:exon:1505;Parent=DT07206-RA;
jcf7180002374983_pilon	maker	exon	561544	561654	.	-	.	ID=DT07206-RA:exon:1504;Parent=DT07206-RA;
jcf7180002374983_pilon	maker	exon	563202	563300	.	-	.	ID=DT07206-RA:exon:1503;Parent=DT07206-RA;
jcf7180002374983_pilon	maker	exon	563382	563488	.	-	.	ID=DT07206-RA:exon:1502;Parent=DT07206-RA;
jcf7180002374983_pilon	maker	exon	563564	563670	.	-	.	ID=DT07206-RA:exon:1501;Parent=DT07206-RA;
jcf7180002374983_pilon	maker	exon	563997	564252	.	-	.	ID=DT07206-RA:exon:1500;Parent=DT07206-RA;
jcf7180002374983_pilon	maker	exon	293162	293980	.	-	.	ID=DT07193-RA:exon:1542;Parent=DT07193-RA;
jcf7180002374983_pilon	maker	exon	297797	297913	.	-	.	ID=DT07193-RA:exon:1541;Parent=DT07193-RA;
jcf7180002374983_pilon	maker	exon	300389	300478	.	-	.	ID=DT07193-RA:exon:1540;Parent=DT07193-RA;
jcf7180002374983_pilon	maker	exon	300591	300691	.	-	.	ID=DT07193-RA:exon:1539;Parent=DT07193-RA;
jcf7180002374983_pilon	maker	exon	300782	300860	.	-	.	ID=DT07193-RA:exon:1538;Parent=DT07193-RA;
jcf7180002374983_pilon	maker	exon	301677	301795	.	-	.	ID=DT07193-RA:exon:1537;Parent=DT07193-RA;
jcf7180002374983_pilon	maker	exon	303760	303865	.	-	.	ID=DT07193-RA:exon:1536;Parent=DT07193-RA;
jcf7180002374983_pilon	maker	exon	307410	307509	.	-	.	ID=DT07193-RA:exon:1535;Parent=DT07193-RA;
jcf7180002374983_pilon	maker	exon	310702	310813	.	-	.	ID=DT07193-RA:exon:1534;Parent=DT07193-RA;
jcf7180002374983_pilon	maker	exon	312528	312650	.	-	.	ID=DT07193-RA:exon:1533;Parent=DT07193-RA;
jcf7180002374983_pilon	maker	exon	313125	313222	.	-	.	ID=DT07193-RA:exon:1532;Parent=DT07193-RA;
jcf7180002374983_pilon	maker	exon	315869	316016	.	-	.	ID=DT07193-RA:exon:1531;Parent=DT07193-RA;
jcf7180002374983_pilon	maker	exon	316096	316184	.	-	.	ID=DT07193-RA:exon:1530;Parent=DT07193-RA;
jcf7180002374983_pilon	maker	exon	316259	316372	.	-	.	ID=DT07193-RA:exon:1529;Parent=DT07193-RA;
jcf7180002374983_pilon	maker	exon	319479	319583	.	-	.	ID=DT07193-RA:exon:1528;Parent=DT07193-RA;
jcf7180002374983_pilon	maker	exon	319663	319716	.	-	.	ID=DT07193-RA:exon:1527;Parent=DT07193-RA;
jcf7180002374983_pilon	maker	exon	320055	320190	.	-	.	ID=DT07193-RA:exon:1526;Parent=DT07193-RA;
jcf7180002374983_pilon	maker	exon	321254	321360	.	-	.	ID=DT07193-RA:exon:1525;Parent=DT07193-RA;
jcf7180002374983_pilon	maker	exon	322174	322302	.	-	.	ID=DT07193-RA:exon:1524;Parent=DT07193-RA;
jcf7180002374983_pilon	maker	exon	324333	324479	.	-	.	ID=DT07193-RA:exon:1523;Parent=DT07193-RA;
jcf7180002374983_pilon	maker	exon	324649	324936	.	-	.	ID=DT07193-RA:exon:1522;Parent=DT07193-RA;
jcf7180002374983_pilon	maker	exon	327066	327174	.	-	.	ID=DT07193-RA:exon:1521;Parent=DT07193-RA;
jcf7180002374983_pilon	maker	exon	331170	331287	.	-	.	ID=DT07193-RA:exon:1520;Parent=DT07193-RA;
jcf7180002374983_pilon	maker	exon	333634	333790	.	-	.	ID=DT07193-RA:exon:1519;Parent=DT07193-RA;
jcf7180002374983_pilon	maker	exon	335159	335328	.	-	.	ID=DT07193-RA:exon:1518;Parent=DT07193-RA;
jcf7180002374983_pilon	maker	exon	336068	336185	.	-	.	ID=DT07193-RA:exon:1517;Parent=DT07193-RA;
jcf7180002374983_pilon	maker	exon	336263	336434	.	-	.	ID=DT07193-RA:exon:1516;Parent=DT07193-RA;
jcf7180002374983_pilon	maker	exon	337223	337359	.	-	.	ID=DT07193-RA:exon:1515;Parent=DT07193-RA;
jcf7180002374983_pilon	maker	exon	337438	337597	.	-	.	ID=DT07193-RA:exon:1514;Parent=DT07193-RA;
jcf7180002374983_pilon	maker	exon	338501	338625	.	-	.	ID=DT07193-RA:exon:1513;Parent=DT07193-RA;
jcf7180002374983_pilon	maker	exon	339967	340163	.	-	.	ID=DT07193-RA:exon:1512;Parent=DT07193-RA;
jcf7180002374983_pilon	maker	exon	341866	341962	.	-	.	ID=DT07193-RA:exon:1511;Parent=DT07193-RA;
jcf7180002374983_pilon	maker	exon	351548	352146	.	-	.	ID=DT07193-RA:exon:1510;Parent=DT07193-RA;
jcf7180002374983_pilon	maker	exon	567222	568576	.	-	.	ID=DT07208-RA:exon:1550;Parent=DT07208-RA,DT07208-RB;
jcf7180002374983_pilon	maker	exon	569561	569710	.	-	.	ID=DT07208-RA:exon:1549;Parent=DT07208-RA,DT07208-RB;
jcf7180002374983_pilon	maker	exon	569799	569981	.	-	.	ID=DT07208-RA:exon:1548;Parent=DT07208-RA,DT07208-RB;
jcf7180002374983_pilon	maker	exon	570059	570098	.	-	.	ID=DT07208-RA:exon:1547;Parent=DT07208-RA,DT07208-RB;
jcf7180002374983_pilon	maker	exon	570638	570736	.	-	.	ID=DT07208-RA:exon:1546;Parent=DT07208-RA,DT07208-RB;
jcf7180002374983_pilon	maker	exon	570803	570867	.	-	.	ID=DT07208-RA:exon:1545;Parent=DT07208-RA,DT07208-RB;
jcf7180002374983_pilon	maker	exon	571337	571417	.	-	.	ID=DT07208-RA:exon:1544;Parent=DT07208-RA;
jcf7180002374983_pilon	maker	exon	571502	572237	.	-	.	ID=DT07208-RA:exon:1543;Parent=DT07208-RA,DT07208-RB;
jcf7180002374983_pilon	maker	exon	374656	376000	.	-	.	ID=DT07196-RA:exon:1566;Parent=DT07196-RA;
jcf7180002374983_pilon	maker	exon	376089	376185	.	-	.	ID=DT07196-RA:exon:1565;Parent=DT07196-RA;
jcf7180002374983_pilon	maker	exon	377108	377147	.	-	.	ID=DT07196-RA:exon:1564;Parent=DT07196-RA;
jcf7180002374983_pilon	maker	exon	378803	378912	.	-	.	ID=DT07196-RA:exon:1563;Parent=DT07196-RA;
jcf7180002374983_pilon	maker	exon	379028	379200	.	-	.	ID=DT07196-RA:exon:1562;Parent=DT07196-RA;
jcf7180002374983_pilon	maker	exon	379277	379378	.	-	.	ID=DT07196-RA:exon:1561;Parent=DT07196-RA;
jcf7180002374983_pilon	maker	exon	379903	379953	.	-	.	ID=DT07196-RA:exon:1560;Parent=DT07196-RA;
jcf7180002374983_pilon	maker	exon	380032	380073	.	-	.	ID=DT07196-RA:exon:1559;Parent=DT07196-RA;
jcf7180002374983_pilon	maker	exon	381670	381785	.	-	.	ID=DT07196-RA:exon:1558;Parent=DT07196-RA;
jcf7180002374983_pilon	maker	exon	381978	382255	.	-	.	ID=DT07196-RA:exon:1557;Parent=DT07196-RA;
jcf7180002374983_pilon	maker	exon	383862	383937	.	-	.	ID=DT07196-RA:exon:1556;Parent=DT07196-RA;
jcf7180002374983_pilon	maker	exon	384024	384200	.	-	.	ID=DT07196-RA:exon:1555;Parent=DT07196-RA;
jcf7180002374983_pilon	maker	exon	387280	387394	.	-	.	ID=DT07196-RA:exon:1554;Parent=DT07196-RA;
jcf7180002374983_pilon	maker	exon	395117	395219	.	-	.	ID=DT07196-RA:exon:1553;Parent=DT07196-RA;
jcf7180002374983_pilon	maker	exon	397722	397878	.	-	.	ID=DT07196-RA:exon:1552;Parent=DT07196-RA;
jcf7180002374983_pilon	maker	exon	402028	402238	.	-	.	ID=DT07196-RA:exon:1551;Parent=DT07196-RA;
jcf7180002374983_pilon	maker	exon	536587	536788	.	-	.	ID=DT07203-RF:exon:1580;Parent=DT07203-RF;
jcf7180002374983_pilon	maker	exon	532094	532615	.	-	.	ID=DT07203-RE:exon:1579;Parent=DT07203-RE;
jcf7180002374983_pilon	maker	exon	527905	529419	.	-	.	ID=DT07203-RB:exon:1578;Parent=DT07203-RB,DT07203-RA;
jcf7180002374983_pilon	maker	exon	530417	532494	.	-	.	ID=DT07203-RC:exon:1577;Parent=DT07203-RC,DT07203-RD;
jcf7180002374983_pilon	maker	exon	534743	534790	.	-	.	ID=DT07203-RC:exon:1576;Parent=DT07203-RC,DT07203-RB,DT07203-RE;
jcf7180002374983_pilon	maker	exon	536598	536788	.	-	.	ID=DT07203-RC:exon:1575;Parent=DT07203-RC,DT07203-RB,DT07203-RE,DT07203-RD,DT07203-RA;
jcf7180002374983_pilon	maker	exon	537001	537133	.	-	.	ID=DT07203-RC:exon:1574;Parent=DT07203-RC,DT07203-RB,DT07203-RE,DT07203-RD,DT07203-RA,DT07203-RF;
jcf7180002374983_pilon	maker	exon	537219	537387	.	-	.	ID=DT07203-RC:exon:1573;Parent=DT07203-RC,DT07203-RB,DT07203-RE,DT07203-RD,DT07203-RA,DT07203-RF;
jcf7180002374983_pilon	maker	exon	538833	538929	.	-	.	ID=DT07203-RC:exon:1572;Parent=DT07203-RC,DT07203-RB,DT07203-RE,DT07203-RD,DT07203-RA,DT07203-RF;
jcf7180002374983_pilon	maker	exon	539866	540027	.	-	.	ID=DT07203-RC:exon:1571;Parent=DT07203-RC,DT07203-RB,DT07203-RE,DT07203-RD,DT07203-RA,DT07203-RF;
jcf7180002374983_pilon	maker	exon	541657	541843	.	-	.	ID=DT07203-RC:exon:1570;Parent=DT07203-RC,DT07203-RB,DT07203-RE,DT07203-RD,DT07203-RA,DT07203-RF;
jcf7180002374983_pilon	maker	exon	542202	542397	.	-	.	ID=DT07203-RC:exon:1569;Parent=DT07203-RC,DT07203-RB,DT07203-RE,DT07203-RD,DT07203-RA,DT07203-RF;
jcf7180002374983_pilon	maker	exon	544739	544853	.	-	.	ID=DT07203-RC:exon:1568;Parent=DT07203-RC,DT07203-RB,DT07203-RE,DT07203-RD,DT07203-RA,DT07203-RF;
jcf7180002374983_pilon	maker	exon	547016	547115	.	-	.	ID=DT07203-RC:exon:1567;Parent=DT07203-RC,DT07203-RB,DT07203-RE,DT07203-RD,DT07203-RA,DT07203-RF;
jcf7180002374983_pilon	maker	exon	523702	523807	.	-	.	ID=DT07202-RA:exon:1592;Parent=DT07202-RA;
jcf7180002374983_pilon	maker	exon	518787	518880	.	-	.	ID=DT07202-RD:exon:1591;Parent=DT07202-RD,DT07202-RC;
jcf7180002374983_pilon	maker	exon	515006	515392	.	-	.	ID=DT07202-RE:exon:1590;Parent=DT07202-RE,DT07202-RD;
jcf7180002374983_pilon	maker	exon	513911	515386	.	-	.	ID=DT07202-RB:exon:1589;Parent=DT07202-RB,DT07202-RA,DT07202-RC;
jcf7180002374983_pilon	maker	exon	517033	517099	.	-	.	ID=DT07202-RB:exon:1588;Parent=DT07202-RB,DT07202-RE,DT07202-RD,DT07202-RA,DT07202-RC;
jcf7180002374983_pilon	maker	exon	521013	521106	.	-	.	ID=DT07202-RB:exon:1587;Parent=DT07202-RB,DT07202-RE,DT07202-RA;
jcf7180002374983_pilon	maker	exon	521292	521403	.	-	.	ID=DT07202-RB:exon:1586;Parent=DT07202-RB,DT07202-RE,DT07202-RD,DT07202-RA,DT07202-RC;
jcf7180002374983_pilon	maker	exon	521766	521871	.	-	.	ID=DT07202-RB:exon:1585;Parent=DT07202-RB,DT07202-RE,DT07202-RD,DT07202-RC;
jcf7180002374983_pilon	maker	exon	523718	523807	.	-	.	ID=DT07202-RB:exon:1584;Parent=DT07202-RB,DT07202-RE,DT07202-RD;
jcf7180002374983_pilon	maker	exon	524250	524303	.	-	.	ID=DT07202-RB:exon:1583;Parent=DT07202-RB,DT07202-RE,DT07202-RD,DT07202-RA,DT07202-RC;
jcf7180002374983_pilon	maker	exon	525512	525570	.	-	.	ID=DT07202-RB:exon:1582;Parent=DT07202-RB,DT07202-RE,DT07202-RD,DT07202-RA,DT07202-RC;
jcf7180002374983_pilon	maker	exon	526430	526643	.	-	.	ID=DT07202-RB:exon:1581;Parent=DT07202-RB,DT07202-RE,DT07202-RD,DT07202-RA,DT07202-RC;
jcf7180002374983_pilon	maker	exon	505083	505289	.	-	.	ID=DT07201-RA:exon:1598;Parent=DT07201-RA;
jcf7180002374983_pilon	maker	exon	507779	507831	.	-	.	ID=DT07201-RA:exon:1597;Parent=DT07201-RA;
jcf7180002374983_pilon	maker	exon	508123	508240	.	-	.	ID=DT07201-RA:exon:1596;Parent=DT07201-RA;
jcf7180002374983_pilon	maker	exon	509551	509654	.	-	.	ID=DT07201-RA:exon:1595;Parent=DT07201-RA;
jcf7180002374983_pilon	maker	exon	509827	509974	.	-	.	ID=DT07201-RA:exon:1594;Parent=DT07201-RA;
jcf7180002374983_pilon	maker	exon	511902	512497	.	-	.	ID=DT07201-RA:exon:1593;Parent=DT07201-RA;
jcf7180002374983_pilon	maker	exon	642005	642958	.	-	.	ID=DT07215-RA:exon:1599;Parent=DT07215-RA;
jcf7180002374983_pilon	maker	exon	482650	483227	.	-	.	ID=DT07199-RB:exon:1614;Parent=DT07199-RB,DT07199-RA;
jcf7180002374983_pilon	maker	exon	484566	484648	.	-	.	ID=DT07199-RB:exon:1613;Parent=DT07199-RB,DT07199-RA;
jcf7180002374983_pilon	maker	exon	484772	484919	.	-	.	ID=DT07199-RB:exon:1612;Parent=DT07199-RB,DT07199-RA;
jcf7180002374983_pilon	maker	exon	485151	485299	.	-	.	ID=DT07199-RB:exon:1611;Parent=DT07199-RB,DT07199-RA;
jcf7180002374983_pilon	maker	exon	485780	486004	.	-	.	ID=DT07199-RB:exon:1610;Parent=DT07199-RB,DT07199-RA;
jcf7180002374983_pilon	maker	exon	486128	486287	.	-	.	ID=DT07199-RB:exon:1609;Parent=DT07199-RB,DT07199-RA;
jcf7180002374983_pilon	maker	exon	486356	486438	.	-	.	ID=DT07199-RB:exon:1608;Parent=DT07199-RB,DT07199-RA;
jcf7180002374983_pilon	maker	exon	488849	488988	.	-	.	ID=DT07199-RB:exon:1607;Parent=DT07199-RB,DT07199-RA;
jcf7180002374983_pilon	maker	exon	489092	489185	.	-	.	ID=DT07199-RB:exon:1606;Parent=DT07199-RB,DT07199-RA;
jcf7180002374983_pilon	maker	exon	489394	489492	.	-	.	ID=DT07199-RB:exon:1605;Parent=DT07199-RB,DT07199-RA;
jcf7180002374983_pilon	maker	exon	490678	490737	.	-	.	ID=DT07199-RB:exon:1604;Parent=DT07199-RB,DT07199-RA;
jcf7180002374983_pilon	maker	exon	490814	490907	.	-	.	ID=DT07199-RB:exon:1603;Parent=DT07199-RB,DT07199-RA;
jcf7180002374983_pilon	maker	exon	491085	491188	.	-	.	ID=DT07199-RB:exon:1602;Parent=DT07199-RB,DT07199-RA;
jcf7180002374983_pilon	maker	exon	492004	492177	.	-	.	ID=DT07199-RB:exon:1601;Parent=DT07199-RB;
jcf7180002374983_pilon	maker	exon	498383	498524	.	-	.	ID=DT07199-RB:exon:1600;Parent=DT07199-RB,DT07199-RA;
jcf7180002374983_pilon	maker	exon	580705	580800	.	-	.	ID=DT07210-RA:exon:1624;Parent=DT07210-RA,DT07210-RB;
jcf7180002374983_pilon	maker	exon	584270	584413	.	-	.	ID=DT07210-RA:exon:1623;Parent=DT07210-RA,DT07210-RB;
jcf7180002374983_pilon	maker	exon	585608	585770	.	-	.	ID=DT07210-RA:exon:1622;Parent=DT07210-RA,DT07210-RB;
jcf7180002374983_pilon	maker	exon	586142	586213	.	-	.	ID=DT07210-RA:exon:1621;Parent=DT07210-RA;
jcf7180002374983_pilon	maker	exon	586566	586654	.	-	.	ID=DT07210-RA:exon:1620;Parent=DT07210-RA,DT07210-RB;
jcf7180002374983_pilon	maker	exon	589313	589378	.	-	.	ID=DT07210-RA:exon:1619;Parent=DT07210-RA,DT07210-RB;
jcf7180002374983_pilon	maker	exon	589455	589544	.	-	.	ID=DT07210-RA:exon:1618;Parent=DT07210-RA,DT07210-RB;
jcf7180002374983_pilon	maker	exon	592054	592116	.	-	.	ID=DT07210-RA:exon:1617;Parent=DT07210-RA,DT07210-RB;
jcf7180002374983_pilon	maker	exon	594473	594615	.	-	.	ID=DT07210-RA:exon:1616;Parent=DT07210-RA,DT07210-RB;
jcf7180002374983_pilon	maker	exon	595030	595265	.	-	.	ID=DT07210-RA:exon:1615;Parent=DT07210-RA,DT07210-RB;
jcf7180002374983_pilon	maker	exon	414507	414559	.	-	.	ID=DT07197-RA:exon:1627;Parent=DT07197-RA;
jcf7180002374983_pilon	maker	exon	414221	414433	.	-	.	ID=DT07197-RA:exon:1626;Parent=DT07197-RA;
jcf7180002374983_pilon	maker	exon	411199	411352	.	-	.	ID=DT07197-RA:exon:1625;Parent=DT07197-RA;
jcf7180002374983_pilon	maker	exon	358229	358299	.	+	.	ID=DT07194-RA:exon:1628;Parent=DT07194-RA;
jcf7180002357703_pilon	maker	exon	138	341	.	-	.	ID=DT35695-RA:exon:81;Parent=DT35695-RA;
jcf7180002357703_pilon	maker	exon	31	69	.	-	.	ID=DT35695-RA:exon:80;Parent=DT35695-RA;
jcf7180002375004_pilon	maker	exon	80689	80709	.	+	.	ID=DT02341-RA:exon:1630;Parent=DT02341-RA;
jcf7180002375004_pilon	maker	exon	80805	80900	.	+	.	ID=DT02341-RA:exon:1631;Parent=DT02341-RA;
jcf7180002375004_pilon	maker	exon	86734	87045	.	+	.	ID=DT02341-RA:exon:1632;Parent=DT02341-RA;
jcf7180002375004_pilon	maker	exon	48229	48273	.	+	.	ID=DT02338-RA:exon:1633;Parent=DT02338-RA;
jcf7180002375004_pilon	maker	exon	48746	48912	.	+	.	ID=DT02338-RA:exon:1634;Parent=DT02338-RA;
jcf7180002375004_pilon	maker	exon	48992	49076	.	+	.	ID=DT02338-RA:exon:1635;Parent=DT02338-RA;
jcf7180002375004_pilon	maker	exon	58438	59006	.	+	.	ID=DT02338-RA:exon:1636;Parent=DT02338-RA;
jcf7180002375004_pilon	maker	exon	100377	101100	.	+	.	ID=DT02342-RA:exon:1637;Parent=DT02342-RA;
jcf7180002375004_pilon	maker	exon	102487	103185	.	+	.	ID=DT02342-RA:exon:1638;Parent=DT02342-RA;
jcf7180002375004_pilon	maker	exon	105303	106538	.	+	.	ID=DT02342-RA:exon:1639;Parent=DT02342-RA;
jcf7180002375004_pilon	maker	exon	61638	61783	.	+	.	ID=DT02339-RB:exon:1640;Parent=DT02339-RB,DT02339-RA;
jcf7180002375004_pilon	maker	exon	64239	64400	.	+	.	ID=DT02339-RB:exon:1641;Parent=DT02339-RB,DT02339-RA;
jcf7180002375004_pilon	maker	exon	64478	64635	.	+	.	ID=DT02339-RB:exon:1642;Parent=DT02339-RB,DT02339-RA;
jcf7180002375004_pilon	maker	exon	66419	66507	.	+	.	ID=DT02339-RB:exon:1643;Parent=DT02339-RB,DT02339-RA;
jcf7180002375004_pilon	maker	exon	66826	66893	.	+	.	ID=DT02339-RB:exon:1644;Parent=DT02339-RB,DT02339-RA;
jcf7180002375004_pilon	maker	exon	66970	67151	.	+	.	ID=DT02339-RB:exon:1645;Parent=DT02339-RB,DT02339-RA;
jcf7180002375004_pilon	maker	exon	68169	68289	.	+	.	ID=DT02339-RB:exon:1646;Parent=DT02339-RB,DT02339-RA;
jcf7180002375004_pilon	maker	exon	68465	68621	.	+	.	ID=DT02339-RB:exon:1647;Parent=DT02339-RB,DT02339-RA;
jcf7180002375004_pilon	maker	exon	69653	69800	.	+	.	ID=DT02339-RB:exon:1648;Parent=DT02339-RB,DT02339-RA;
jcf7180002375004_pilon	maker	exon	70373	70478	.	+	.	ID=DT02339-RB:exon:1649;Parent=DT02339-RB,DT02339-RA;
jcf7180002375004_pilon	maker	exon	70564	70693	.	+	.	ID=DT02339-RB:exon:1650;Parent=DT02339-RB,DT02339-RA;
jcf7180002375004_pilon	maker	exon	70896	71039	.	+	.	ID=DT02339-RB:exon:1651;Parent=DT02339-RB,DT02339-RA;
jcf7180002375004_pilon	maker	exon	71136	71231	.	+	.	ID=DT02339-RB:exon:1652;Parent=DT02339-RB,DT02339-RA;
jcf7180002375004_pilon	maker	exon	71464	75537	.	+	.	ID=DT02339-RB:exon:1653;Parent=DT02339-RB;
jcf7180002375004_pilon	maker	exon	75651	76469	.	+	.	ID=DT02339-RB:exon:1654;Parent=DT02339-RB;
jcf7180002375004_pilon	maker	exon	71464	76469	.	+	.	ID=DT02339-RA:exon:1655;Parent=DT02339-RA;
jcf7180002375004_pilon	maker	exon	40433	40619	.	+	.	ID=DT02337-RA:exon:1656;Parent=DT02337-RA,DT02337-RB;
jcf7180002375004_pilon	maker	exon	40897	41109	.	+	.	ID=DT02337-RA:exon:1657;Parent=DT02337-RA,DT02337-RB;
jcf7180002375004_pilon	maker	exon	44503	44686	.	+	.	ID=DT02337-RA:exon:1658;Parent=DT02337-RA,DT02337-RB;
jcf7180002375004_pilon	maker	exon	46094	46249	.	+	.	ID=DT02337-RA:exon:1659;Parent=DT02337-RA,DT02337-RB;
jcf7180002375004_pilon	maker	exon	46323	46429	.	+	.	ID=DT02337-RA:exon:1660;Parent=DT02337-RA;
jcf7180002375004_pilon	maker	exon	46530	47298	.	+	.	ID=DT02337-RA:exon:1661;Parent=DT02337-RA,DT02337-RB;
jcf7180002375004_pilon	maker	exon	46346	46409	.	+	.	ID=DT02337-RB:exon:1662;Parent=DT02337-RB;
jcf7180002375004_pilon	maker	exon	224398	224786	.	+	.	ID=DT02345-RA:exon:1663;Parent=DT02345-RA;
jcf7180002375004_pilon	maker	exon	228885	229412	.	+	.	ID=DT02345-RA:exon:1664;Parent=DT02345-RA;
jcf7180002375004_pilon	maker	exon	229555	229719	.	+	.	ID=DT02345-RA:exon:1665;Parent=DT02345-RA;
jcf7180002375004_pilon	maker	exon	230964	232129	.	+	.	ID=DT02345-RA:exon:1666;Parent=DT02345-RA;
jcf7180002375004_pilon	maker	exon	33083	33176	.	+	.	ID=DT02336-RA:exon:1667;Parent=DT02336-RA;
jcf7180002375004_pilon	maker	exon	33552	33680	.	+	.	ID=DT02336-RA:exon:1668;Parent=DT02336-RA;
jcf7180002375004_pilon	maker	exon	33758	33913	.	+	.	ID=DT02336-RA:exon:1669;Parent=DT02336-RA;
jcf7180002375004_pilon	maker	exon	35050	35193	.	+	.	ID=DT02336-RA:exon:1670;Parent=DT02336-RA;
jcf7180002375004_pilon	maker	exon	35566	35704	.	+	.	ID=DT02336-RA:exon:1671;Parent=DT02336-RA;
jcf7180002375004_pilon	maker	exon	36553	36680	.	+	.	ID=DT02336-RA:exon:1672;Parent=DT02336-RA;
jcf7180002375004_pilon	maker	exon	36854	36912	.	+	.	ID=DT02336-RA:exon:1673;Parent=DT02336-RA;
jcf7180002375004_pilon	maker	exon	36996	37131	.	+	.	ID=DT02336-RA:exon:1674;Parent=DT02336-RA;
jcf7180002375004_pilon	maker	exon	37717	37764	.	+	.	ID=DT02336-RA:exon:1675;Parent=DT02336-RA;
jcf7180002375004_pilon	maker	exon	37949	38047	.	+	.	ID=DT02336-RA:exon:1676;Parent=DT02336-RA;
jcf7180002375004_pilon	maker	exon	38485	39276	.	+	.	ID=DT02336-RA:exon:1677;Parent=DT02336-RA;
jcf7180002375004_pilon	maker	exon	10149	10301	.	+	.	ID=DT02333-RA:exon:1678;Parent=DT02333-RA;
jcf7180002375004_pilon	maker	exon	10955	11139	.	+	.	ID=DT02333-RA:exon:1679;Parent=DT02333-RA;
jcf7180002375004_pilon	maker	exon	11204	11349	.	+	.	ID=DT02333-RA:exon:1680;Parent=DT02333-RA;
jcf7180002375004_pilon	maker	exon	12960	13172	.	+	.	ID=DT02333-RA:exon:1681;Parent=DT02333-RA;
jcf7180002375004_pilon	maker	exon	13383	13498	.	+	.	ID=DT02333-RA:exon:1682;Parent=DT02333-RA;
jcf7180002375004_pilon	maker	exon	15387	15499	.	+	.	ID=DT02333-RA:exon:1683;Parent=DT02333-RA;
jcf7180002375004_pilon	maker	exon	15578	15750	.	+	.	ID=DT02333-RA:exon:1684;Parent=DT02333-RA;
jcf7180002375004_pilon	maker	exon	15820	16695	.	+	.	ID=DT02333-RA:exon:1685;Parent=DT02333-RA;
jcf7180002375004_pilon	maker	exon	1284	1300	.	+	.	ID=DT02332-RA:exon:1686;Parent=DT02332-RA;
jcf7180002375004_pilon	maker	exon	1407	1465	.	+	.	ID=DT02332-RA:exon:1687;Parent=DT02332-RA;
jcf7180002375004_pilon	maker	exon	2537	2701	.	+	.	ID=DT02332-RA:exon:1688;Parent=DT02332-RA;
jcf7180002375004_pilon	maker	exon	6473	6589	.	+	.	ID=DT02332-RA:exon:1689;Parent=DT02332-RA;
jcf7180002375004_pilon	maker	exon	6672	6716	.	+	.	ID=DT02332-RA:exon:1690;Parent=DT02332-RA;
jcf7180002375004_pilon	maker	exon	7855	7950	.	+	.	ID=DT02332-RA:exon:1691;Parent=DT02332-RA;
jcf7180002375004_pilon	maker	exon	8018	8119	.	+	.	ID=DT02332-RA:exon:1692;Parent=DT02332-RA;
jcf7180002375004_pilon	maker	exon	8212	8245	.	+	.	ID=DT02332-RA:exon:1693;Parent=DT02332-RA;
jcf7180002375004_pilon	maker	exon	8355	8425	.	+	.	ID=DT02332-RA:exon:1694;Parent=DT02332-RA;
jcf7180002375004_pilon	maker	exon	8528	9598	.	+	.	ID=DT02332-RA:exon:1695;Parent=DT02332-RA;
jcf7180002375004_pilon	maker	exon	16258	19494	.	-	.	ID=DT02334-RA:exon:1713;Parent=DT02334-RA;
jcf7180002375004_pilon	maker	exon	19606	19685	.	-	.	ID=DT02334-RA:exon:1712;Parent=DT02334-RA;
jcf7180002375004_pilon	maker	exon	20069	20304	.	-	.	ID=DT02334-RA:exon:1711;Parent=DT02334-RA;
jcf7180002375004_pilon	maker	exon	21676	21768	.	-	.	ID=DT02334-RA:exon:1710;Parent=DT02334-RA;
jcf7180002375004_pilon	maker	exon	22098	22366	.	-	.	ID=DT02334-RA:exon:1709;Parent=DT02334-RA;
jcf7180002375004_pilon	maker	exon	22476	22510	.	-	.	ID=DT02334-RA:exon:1708;Parent=DT02334-RA;
jcf7180002375004_pilon	maker	exon	22714	23119	.	-	.	ID=DT02334-RA:exon:1707;Parent=DT02334-RA;
jcf7180002375004_pilon	maker	exon	23217	23326	.	-	.	ID=DT02334-RA:exon:1706;Parent=DT02334-RA;
jcf7180002375004_pilon	maker	exon	23444	23566	.	-	.	ID=DT02334-RA:exon:1705;Parent=DT02334-RA;
jcf7180002375004_pilon	maker	exon	24149	24239	.	-	.	ID=DT02334-RA:exon:1704;Parent=DT02334-RA;
jcf7180002375004_pilon	maker	exon	25219	25380	.	-	.	ID=DT02334-RA:exon:1703;Parent=DT02334-RA;
jcf7180002375004_pilon	maker	exon	25465	25589	.	-	.	ID=DT02334-RA:exon:1702;Parent=DT02334-RA;
jcf7180002375004_pilon	maker	exon	26408	26472	.	-	.	ID=DT02334-RA:exon:1701;Parent=DT02334-RA;
jcf7180002375004_pilon	maker	exon	27304	27576	.	-	.	ID=DT02334-RA:exon:1700;Parent=DT02334-RA;
jcf7180002375004_pilon	maker	exon	27852	27901	.	-	.	ID=DT02334-RA:exon:1699;Parent=DT02334-RA;
jcf7180002375004_pilon	maker	exon	29129	29198	.	-	.	ID=DT02334-RA:exon:1698;Parent=DT02334-RA;
jcf7180002375004_pilon	maker	exon	29398	29491	.	-	.	ID=DT02334-RA:exon:1697;Parent=DT02334-RA;
jcf7180002375004_pilon	maker	exon	29919	30207	.	-	.	ID=DT02334-RA:exon:1696;Parent=DT02334-RA;
jcf7180002375004_pilon	maker	exon	79968	80094	.	-	.	ID=DT02340-RA:exon:1718;Parent=DT02340-RA;
jcf7180002375004_pilon	maker	exon	76933	77050	.	-	.	ID=DT02340-RA:exon:1717;Parent=DT02340-RA;
jcf7180002375004_pilon	maker	exon	75642	76539	.	-	.	ID=DT02340-RA:exon:1716;Parent=DT02340-RA;
jcf7180002375004_pilon	maker	exon	73822	75524	.	-	.	ID=DT02340-RA:exon:1715;Parent=DT02340-RA;
jcf7180002375004_pilon	maker	exon	71472	71511	.	-	.	ID=DT02340-RA:exon:1714;Parent=DT02340-RA;
jcf7180002375004_pilon	maker	exon	151911	151964	.	-	.	ID=DT02344-RA:exon:1721;Parent=DT02344-RA;
jcf7180002375004_pilon	maker	exon	150249	150392	.	-	.	ID=DT02344-RA:exon:1720;Parent=DT02344-RA;
jcf7180002375004_pilon	maker	exon	146123	146233	.	-	.	ID=DT02344-RA:exon:1719;Parent=DT02344-RA;
jcf7180002375004_pilon	maker	exon	125386	126356	.	-	.	ID=DT02343-RA:exon:1724;Parent=DT02343-RA;
jcf7180002375004_pilon	maker	exon	127242	128368	.	-	.	ID=DT02343-RA:exon:1723;Parent=DT02343-RA;
jcf7180002375004_pilon	maker	exon	129253	129386	.	-	.	ID=DT02343-RA:exon:1722;Parent=DT02343-RA;
jcf7180002375004_pilon	maker	exon	32043	32115	.	+	.	ID=DT02335-RA:exon:1725;Parent=DT02335-RA;
jcf7180002375004_pilon	maker	exon	258274	258566	.	+	.	ID=DT02347-RA:exon:1726;Parent=DT02347-RA;
jcf7180002375004_pilon	maker	exon	262732	267171	.	+	.	ID=DT02347-RA:exon:1727;Parent=DT02347-RA;
jcf7180002375004_pilon	maker	exon	267256	267344	.	+	.	ID=DT02347-RA:exon:1728;Parent=DT02347-RA;
jcf7180002375004_pilon	maker	exon	268572	268643	.	+	.	ID=DT02347-RA:exon:1729;Parent=DT02347-RA;
jcf7180002375004_pilon	maker	exon	268735	268881	.	+	.	ID=DT02347-RA:exon:1730;Parent=DT02347-RA;
jcf7180002375004_pilon	maker	exon	268960	269091	.	+	.	ID=DT02347-RA:exon:1731;Parent=DT02347-RA;
jcf7180002375004_pilon	maker	exon	269302	269380	.	+	.	ID=DT02347-RA:exon:1732;Parent=DT02347-RA;
jcf7180002375004_pilon	maker	exon	270004	270173	.	+	.	ID=DT02347-RA:exon:1733;Parent=DT02347-RA;
jcf7180002375004_pilon	maker	exon	244034	244086	.	+	.	ID=DT02346-RA:exon:1734;Parent=DT02346-RA,DT02346-RB;
jcf7180002375004_pilon	maker	exon	244760	244883	.	+	.	ID=DT02346-RA:exon:1735;Parent=DT02346-RA;
jcf7180002375004_pilon	maker	exon	245009	245467	.	+	.	ID=DT02346-RA:exon:1736;Parent=DT02346-RA,DT02346-RC,DT02346-RB;
jcf7180002375004_pilon	maker	exon	245551	245732	.	+	.	ID=DT02346-RA:exon:1737;Parent=DT02346-RA,DT02346-RC,DT02346-RB;
jcf7180002375004_pilon	maker	exon	246898	247042	.	+	.	ID=DT02346-RA:exon:1738;Parent=DT02346-RA,DT02346-RC,DT02346-RB;
jcf7180002375004_pilon	maker	exon	247107	247281	.	+	.	ID=DT02346-RA:exon:1739;Parent=DT02346-RA,DT02346-RC,DT02346-RB;
jcf7180002375004_pilon	maker	exon	247364	247521	.	+	.	ID=DT02346-RA:exon:1740;Parent=DT02346-RA,DT02346-RC,DT02346-RB;
jcf7180002375004_pilon	maker	exon	251317	251461	.	+	.	ID=DT02346-RA:exon:1741;Parent=DT02346-RA,DT02346-RC,DT02346-RB;
jcf7180002375004_pilon	maker	exon	251741	251872	.	+	.	ID=DT02346-RA:exon:1742;Parent=DT02346-RA,DT02346-RC,DT02346-RB;
jcf7180002375004_pilon	maker	exon	253711	253822	.	+	.	ID=DT02346-RA:exon:1743;Parent=DT02346-RA,DT02346-RC,DT02346-RB;
jcf7180002375004_pilon	maker	exon	253895	254009	.	+	.	ID=DT02346-RA:exon:1744;Parent=DT02346-RA,DT02346-RC,DT02346-RB;
jcf7180002375004_pilon	maker	exon	256218	256901	.	+	.	ID=DT02346-RA:exon:1745;Parent=DT02346-RA,DT02346-RC,DT02346-RB;
jcf7180002375004_pilon	maker	exon	244034	244883	.	+	.	ID=DT02346-RC:exon:1746;Parent=DT02346-RC;
jcf7180002375004_pilon	maker	exon	394744	395217	.	+	.	ID=DT02356-RA:exon:1747;Parent=DT02356-RA;
jcf7180002375004_pilon	maker	exon	475238	475240	.	+	.	ID=DT02358-RA:exon:1748;Parent=DT02358-RA;
jcf7180002375004_pilon	maker	exon	476212	476369	.	+	.	ID=DT02358-RA:exon:1749;Parent=DT02358-RA;
jcf7180002375004_pilon	maker	exon	477772	477794	.	+	.	ID=DT02358-RA:exon:1750;Parent=DT02358-RA;
jcf7180002375004_pilon	maker	exon	482999	483097	.	+	.	ID=DT02358-RA:exon:1751;Parent=DT02358-RA;
jcf7180002375004_pilon	maker	exon	483961	484180	.	+	.	ID=DT02358-RA:exon:1752;Parent=DT02358-RA;
jcf7180002375004_pilon	maker	exon	486666	486724	.	+	.	ID=DT02358-RA:exon:1753;Parent=DT02358-RA;
jcf7180002375004_pilon	maker	exon	491225	491325	.	+	.	ID=DT02358-RA:exon:1754;Parent=DT02358-RA;
jcf7180002375004_pilon	maker	exon	352550	353662	.	-	.	ID=DT02354-RA:exon:1757;Parent=DT02354-RA;
jcf7180002375004_pilon	maker	exon	356378	356491	.	-	.	ID=DT02354-RA:exon:1756;Parent=DT02354-RA;
jcf7180002375004_pilon	maker	exon	361843	362016	.	-	.	ID=DT02354-RA:exon:1755;Parent=DT02354-RA;
jcf7180002375004_pilon	maker	exon	281155	281590	.	-	.	ID=DT02352-RA:exon:1762;Parent=DT02352-RA;
jcf7180002375004_pilon	maker	exon	281673	281814	.	-	.	ID=DT02352-RA:exon:1761;Parent=DT02352-RA;
jcf7180002375004_pilon	maker	exon	282399	282569	.	-	.	ID=DT02352-RA:exon:1760;Parent=DT02352-RA;
jcf7180002375004_pilon	maker	exon	282804	282938	.	-	.	ID=DT02352-RA:exon:1759;Parent=DT02352-RA;
jcf7180002375004_pilon	maker	exon	283313	283832	.	-	.	ID=DT02352-RA:exon:1758;Parent=DT02352-RA;
jcf7180002375004_pilon	maker	exon	285547	285746	.	-	.	ID=DT02353-RA:exon:1770;Parent=DT02353-RA;
jcf7180002375004_pilon	maker	exon	289032	289095	.	-	.	ID=DT02353-RA:exon:1769;Parent=DT02353-RA;
jcf7180002375004_pilon	maker	exon	293121	293182	.	-	.	ID=DT02353-RA:exon:1768;Parent=DT02353-RA;
jcf7180002375004_pilon	maker	exon	294013	294192	.	-	.	ID=DT02353-RA:exon:1767;Parent=DT02353-RA;
jcf7180002375004_pilon	maker	exon	294262	294405	.	-	.	ID=DT02353-RA:exon:1766;Parent=DT02353-RA;
jcf7180002375004_pilon	maker	exon	296093	296236	.	-	.	ID=DT02353-RA:exon:1765;Parent=DT02353-RA;
jcf7180002375004_pilon	maker	exon	296367	296561	.	-	.	ID=DT02353-RA:exon:1764;Parent=DT02353-RA;
jcf7180002375004_pilon	maker	exon	303628	304073	.	-	.	ID=DT02353-RA:exon:1763;Parent=DT02353-RA;
jcf7180002375004_pilon	maker	exon	272776	273128	.	-	.	ID=DT02350-RA:exon:1775;Parent=DT02350-RA;
jcf7180002375004_pilon	maker	exon	275005	275082	.	-	.	ID=DT02350-RA:exon:1774;Parent=DT02350-RA;
jcf7180002375004_pilon	maker	exon	276143	276246	.	-	.	ID=DT02350-RA:exon:1773;Parent=DT02350-RA;
jcf7180002375004_pilon	maker	exon	276361	276469	.	-	.	ID=DT02350-RA:exon:1772;Parent=DT02350-RA;
jcf7180002375004_pilon	maker	exon	278126	278468	.	-	.	ID=DT02350-RA:exon:1771;Parent=DT02350-RA;
jcf7180002375004_pilon	maker	exon	393546	393873	.	-	.	ID=DT02355-RB:exon:1789;Parent=DT02355-RB;
jcf7180002375004_pilon	maker	exon	382599	382784	.	-	.	ID=DT02355-RA:exon:1788;Parent=DT02355-RA,DT02355-RB;
jcf7180002375004_pilon	maker	exon	385790	385910	.	-	.	ID=DT02355-RA:exon:1787;Parent=DT02355-RA,DT02355-RB;
jcf7180002375004_pilon	maker	exon	388671	388805	.	-	.	ID=DT02355-RA:exon:1786;Parent=DT02355-RA,DT02355-RB;
jcf7180002375004_pilon	maker	exon	390047	390119	.	-	.	ID=DT02355-RA:exon:1785;Parent=DT02355-RA,DT02355-RB;
jcf7180002375004_pilon	maker	exon	390283	390447	.	-	.	ID=DT02355-RA:exon:1784;Parent=DT02355-RA,DT02355-RB;
jcf7180002375004_pilon	maker	exon	390517	390597	.	-	.	ID=DT02355-RA:exon:1783;Parent=DT02355-RA,DT02355-RB;
[truncated: 271,328 more rows]
